# Supplementary material
Source: publisher site journal article supplement (https://www.dovepress.com/article/495855)
Supplement: Supplementary file 1 [file get_supplementary_file.php]

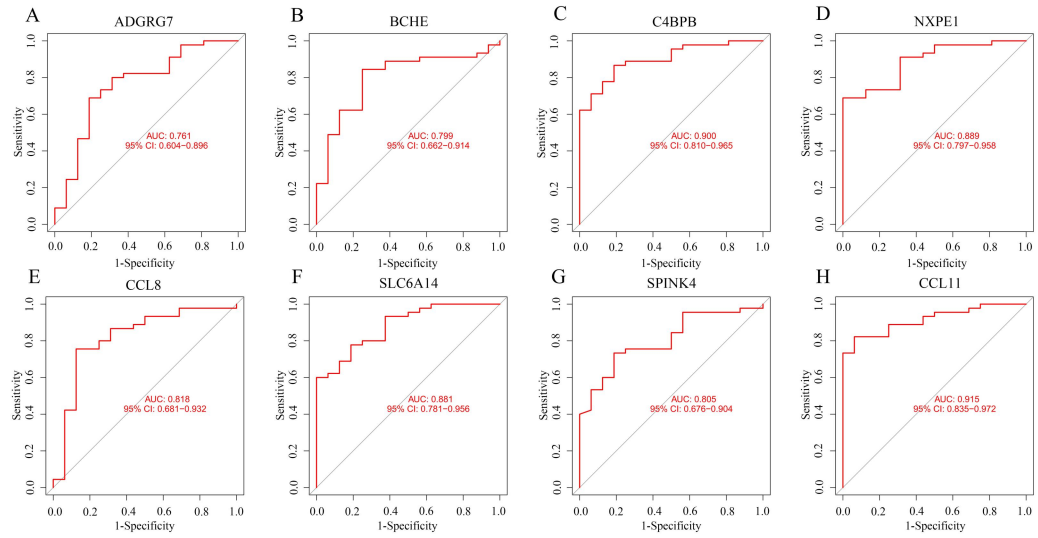

**Figure S1. CCL11, C4BPB, SLC6A14, CCL8, SPINK4, ADGRG7, NXPE1, and BCHE corresponding receiver operating characteristic curves. ROC curve AUC values for each gene are: ADGRG7(AUC=0.751), BCHE((AUC=0.799), C4BPB (AUC=0.9), NXPE1 (AUC=0.889), CCL8 (AUC=0.818), SLC6A14 (AUC=0.881), , SPINK4 (AUC=0.805), CCL11 (AUC=0.915),**

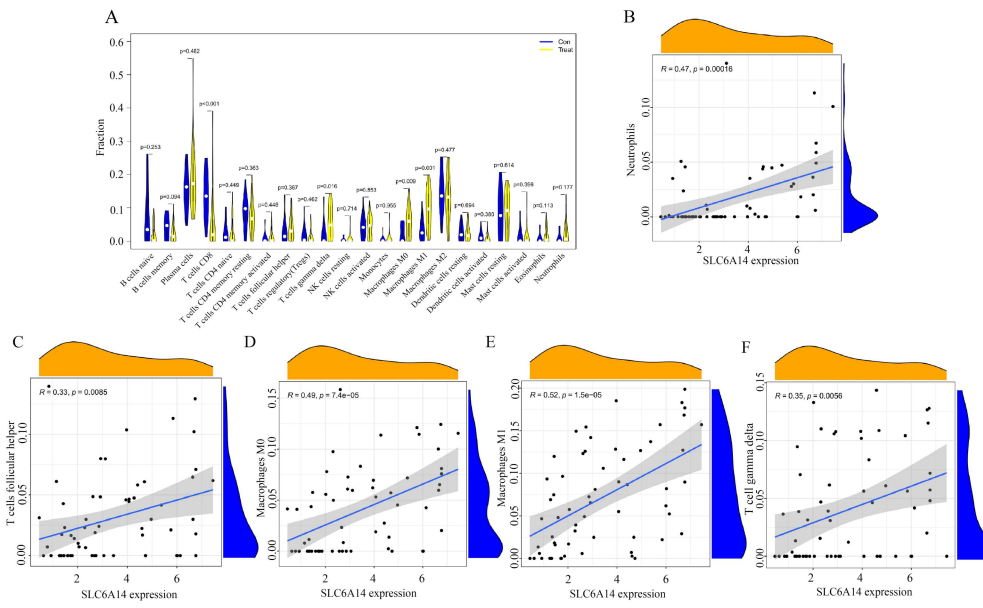

**Figure S2. Correlation between SLC6A14 and the degree of immune cell infiltration in Crohn's disease.** a) Cibersort to evaluate the differences in immune infiltration levels between CD patient samples and normal samples; b) Subsequent correlation analysis further revealed significant positive correlations between SLC6A14 and Neutrophils, Tfh cell, M0, M1, and  $\gamma\delta$  T cells.

**Table S1. The primers for RT-PCR.**

| Gene         | f-prime (5'→3')         | r-prime(5'→3')            |
|--------------|-------------------------|---------------------------|
| h-SLC6A14    | AGCAAAGAGGTGGATATTCTG   | CACCAATGACCAGATAAAATATTGC |
| m-SLC6A14    | GCTTGCTGGTTTGTTCATCACTC | TACACCAGCCAAGAGCAACTCC    |
| INFG         | AGGAACTGGCAAAGGATGGT    | GTTGCTGATGGCCTGATTGT      |
| LAG-3        | CTACAACCTACCGCGTCATTT   | GCTCCAGACCCAGAACCTT       |
| CXCR3        | GCCTTCCTGCTGGCTTGTAT    | TAGCTGCAGTACACGCAGAG      |
| TNF $\alpha$ | GGTGCCTATGTCTCAGCCTCTT  | GCCATAGAACTGATGAGAGGGAG   |
| FASLG        | GCCCATTTAACAGGCAAGTCC   | GCAGGACAATTCCATAGGTGTC    |
| GAPDH        | CAACAGCAACTCCCACTCTTC   | GGTCCAGGGTT TCTTACTCCTT   |

**Table S2. Gene Set Enrichment Analysis of CD Related Genes based on immune-related signaling pathways from MSigDB**

| ID                                                            | setSize | enrichment | NES      | pvalue   | p.adjust | qvalues  | rank |
|---------------------------------------------------------------|---------|------------|----------|----------|----------|----------|------|
| GSE10325_BCELL_VS_MYELOID_DN                                  | 161     | 0.66117    | 2.358703 | 1.00E-10 | 2.81E-09 | 1.64E-09 | 1889 |
| GSE10325_CD4_TCELL_VS_BCELL_UP                                | 160     | 0.645      | 2.30383  | 1.00E-10 | 2.81E-09 | 1.64E-09 | 2054 |
| GSE10325_CD4_TCELL_VS_MYELOID_DN                              | 164     | 0.68933    | 2.464455 | 1.00E-10 | 2.81E-09 | 1.64E-09 | 1613 |
| GSE10325_LUPUS_CD4_TCELL_VS_LUPUS_BCELL_DN                    | 145     | 0.67344    | 2.372063 | 1.00E-10 | 2.81E-09 | 1.64E-09 | 1643 |
| GSE10325_LUPUS_CD4_TCELL_VS_LUPUS_BCELL_UP                    | 164     | 0.62564    | 2.236727 | 1.00E-10 | 2.81E-09 | 1.64E-09 | 2054 |
| GSE10325_LUPUS_CD4_TCELL_VS_LUPUS_MYELOID_D                   | 165     | 0.67343    | 2.412071 | 1.00E-10 | 2.81E-09 | 1.64E-09 | 1825 |
| GSE10325_MYELOID_VS_LUPUS_MYELOID_DN                          | 170     | 0.64134    | 2.305326 | 1.00E-10 | 2.81E-09 | 1.64E-09 | 1383 |
| GSE11057_CD4_EFF_MEM_VS_PBMC_DN                               | 160     | 0.61834    | 2.208611 | 1.00E-10 | 2.81E-09 | 1.64E-09 | 2681 |
| GSE11057_PBMC_VS_MEM_CD4_TCELL_UP                             | 168     | 0.62403    | 2.245641 | 1.00E-10 | 2.81E-09 | 1.64E-09 | 1562 |
| GSE12845_PRE_GC_VS_DARKZONE_GC_TONSIL_BCELL_UP                | 149     | 0.64938    | 2.295474 | 1.00E-10 | 2.81E-09 | 1.64E-09 | 1929 |
| GSE13484_3H_UNSTIM_VS_YF17D_VACCINE_STIM_PBMC_C_DN            | 175     | 0.6201     | 2.245612 | 1.00E-10 | 2.81E-09 | 1.64E-09 | 2398 |
| GSE13484_UNSTIM_VS_YF17D_VACCINE_STIM_PBMC_DN                 | 163     | 0.67099    | 2.392903 | 1.00E-10 | 2.81E-09 | 1.64E-09 | 1504 |
| GSE13485_CTRL_VS_DAY3_YF17D_VACCINE_PBMC_DN                   | 154     | 0.66448    | 2.365656 | 1.00E-10 | 2.81E-09 | 1.64E-09 | 1934 |
| GSE13485_CTRL_VS_DAY7_YF17D_VACCINE_PBMC_DN                   | 167     | 0.69649    | 2.504955 | 1.00E-10 | 2.81E-09 | 1.64E-09 | 1504 |
| GSE13485_DAY1_VS_DAY7_YF17D_VACCINE_PBMC_DN                   | 168     | 0.65754    | 2.36621  | 1.00E-10 | 2.81E-09 | 1.64E-09 | 1504 |
| GSE13485_DAY3_VS_DAY7_YF17D_VACCINE_PBMC_DN                   | 149     | 0.68019    | 2.404394 | 1.00E-10 | 2.81E-09 | 1.64E-09 | 1509 |
| GSE13485_PRE_VS_POST_YF17D_VACCINATION_PBMC_DN                | 162     | 0.65091    | 2.321    | 1.00E-10 | 2.81E-09 | 1.64E-09 | 1428 |
| GSE14000_UNSTIM_VS_4H_LPS_DC_DN                               | 154     | 0.6691     | 2.382109 | 1.00E-10 | 2.81E-09 | 1.64E-09 | 1374 |
| GSE14000_UNSTIM_VS_4H_LPS_DC_TRANSLATED_RNA_DN                | 160     | 0.68933    | 2.462171 | 1.00E-10 | 2.81E-09 | 1.64E-09 | 1374 |
| GSE1432_1H_VS_24H_IFNG_MICROGLIA_DN                           | 160     | 0.67876    | 2.424408 | 1.00E-10 | 2.81E-09 | 1.64E-09 | 2634 |
| GSE1432_1H_VS_6H_IFNG_MICROGLIA_DN                            | 161     | 0.62758    | 2.23886  | 1.00E-10 | 2.81E-09 | 1.64E-09 | 1475 |
| GSE1432_CTRL_VS_IFNG_24H_MICROGLIA_DN                         | 164     | 0.71274    | 2.548141 | 1.00E-10 | 2.81E-09 | 1.64E-09 | 1436 |
| GSE1432_CTRL_VS_IFNG_6H_MICROGLIA_DN                          | 160     | 0.69921    | 2.497467 | 1.00E-10 | 2.81E-09 | 1.64E-09 | 1703 |
| GSE14415_INDUCED_TREG_VS_FOXP3_KO_INDUCED_TREG_IL2_CULTURE_UP | 145     | 0.63608    | 2.240453 | 1.00E-10 | 2.81E-09 | 1.64E-09 | 2103 |
| GSE1460_INTRATHYMIC_T_PROGENITOR_VS_CD4_THYMOCYTE_DN          | 171     | 0.62243    | 2.245141 | 1.00E-10 | 2.81E-09 | 1.64E-09 | 1381 |

|                                                                                        |     |         |          |          |          |          |      |
|----------------------------------------------------------------------------------------|-----|---------|----------|----------|----------|----------|------|
| GSE14769_UNSTIM_VS_120MIN_LPS_BMDM_DN                                                  | 166 | 0.63732 | 2.287298 | 1.00E-10 | 2.81E-09 | 1.64E-09 | 1888 |
| GSE14769_UNSTIM_VS_80MIN_LPS_BMDM_DN                                                   | 158 | 0.65541 | 2.332453 | 1.00E-10 | 2.81E-09 | 1.64E-09 | 1888 |
| GSE15767_MED_VS_SCS_MAC_LN_UP                                                          | 160 | 0.62301 | 2.225299 | 1.00E-10 | 2.81E-09 | 1.64E-09 | 2096 |
| GSE16755_CTRL_VS_IFNA_TREATED_MAC_DN                                                   | 160 | 0.69001 | 2.464605 | 1.00E-10 | 2.81E-09 | 1.64E-09 | 1710 |
| GSE17301_ACD3_ACD28_VS_ACD3_ACD28_AND_IFNA5_STIM_CD8_TCELL_DN                          | 168 | 0.69996 | 2.518881 | 1.00E-10 | 2.81E-09 | 1.64E-09 | 1926 |
| GSE17974_IL4_AND_ANTI_IL12_VS_UNTREATED_48H_ACT_CD4_TCELL_DN                           | 147 | 0.67871 | 2.394038 | 1.00E-10 | 2.81E-09 | 1.64E-09 | 1134 |
| GSE17974_IL4_AND_ANTI_IL12_VS_UNTREATED_72H_ACT_CD4_TCELL_DN                           | 155 | 0.65818 | 2.341717 | 1.00E-10 | 2.81E-09 | 1.64E-09 | 1381 |
| GSE18281_CORTICAL_VS_MEDULLARY_THYMOCYTE_UP                                            | 167 | 0.67221 | 2.417629 | 1.00E-10 | 2.81E-09 | 1.64E-09 | 2467 |
| GSE18281_SUBCAPSULAR_VS_CENTRAL_CORTICAL_REGION_OF_THYMUS_DN                           | 164 | 0.66    | 2.359596 | 1.00E-10 | 2.81E-09 | 1.64E-09 | 1868 |
| GSE18791_CTRL_VS_NEWCASTLE_VIRUS_DC_10H_DN                                             | 158 | 0.62187 | 2.213087 | 1.00E-10 | 2.81E-09 | 1.64E-09 | 1924 |
| GSE18791_CTRL_VS_NEWCASTLE_VIRUS_DC_6H_DN                                              | 161 | 0.62417 | 2.226697 | 1.00E-10 | 2.81E-09 | 1.64E-09 | 1751 |
| GSE18791_CTRL_VS_NEWCASTLE_VIRUS_DC_8H_DN                                              | 160 | 0.65073 | 2.324294 | 1.00E-10 | 2.81E-09 | 1.64E-09 | 1559 |
| GSE18791_UNSTIM_VS_NEWCASTLE_VIRUS_DC_10H_DN                                           | 158 | 0.6684  | 2.378671 | 1.00E-10 | 2.81E-09 | 1.64E-09 | 1509 |
| GSE19198_CTRL_VS_IL21_TREATED_TCELL_24H_UP                                             | 162 | 0.64313 | 2.293245 | 1.00E-10 | 2.81E-09 | 1.64E-09 | 1409 |
| GSE19888_ADENOSINE_A3R_ACT_VS_TCELL_MEMBRANES_ACT_IN_MAST_CELL_UP                      | 153 | 0.65583 | 2.327179 | 1.00E-10 | 2.81E-09 | 1.64E-09 | 2101 |
| GSE19888_ADENOSINE_A3R_INH_PRETREAT_AND_ACT_BY_A3R_VS_TCELL_MEMBRANES_ACT_MAST_CELL_UP | 161 | 0.68528 | 2.444711 | 1.00E-10 | 2.81E-09 | 1.64E-09 | 1308 |
| GSE19888_ADENOSINE_A3R_INH_VS_ACT_WITH_INHIBITOR_PRETREATMENT_IN_MAST_CELL_UP          | 156 | 0.65537 | 2.332656 | 1.00E-10 | 2.81E-09 | 1.64E-09 | 1224 |
| GSE19888_CTRL_VS_TCELL_MEMBRANES_ACT_MAST_CELL_PRETREAT_A3R_INH_DN                     | 166 | 0.65985 | 2.368139 | 1.00E-10 | 2.81E-09 | 1.64E-09 | 1563 |
| GSE21360_PRIMARY_VS_TERTIARY_MEMORY_CD8_TCELL_DN                                       | 166 | 0.67884 | 2.436299 | 1.00E-10 | 2.81E-09 | 1.64E-09 | 1334 |
| GSE21360_SECONDARY_VS_QUATERNARY_MEMORY_CD8_TCELL_UP                                   | 149 | 0.66122 | 2.337343 | 1.00E-10 | 2.81E-09 | 1.64E-09 | 1718 |
| GSE21360_TERTIARY_VS_QUATERNARY_MEMORY_CD8_TCELL_DN                                    | 148 | 0.62286 | 2.192005 | 1.00E-10 | 2.81E-09 | 1.64E-09 | 1707 |
| GSE21670_STAT3_KO_VS_WT_CD4_TCELL_TGFB_IL6_TREATED_DN                                  | 169 | 0.62317 | 2.240312 | 1.00E-10 | 2.81E-09 | 1.64E-09 | 1770 |

|                                                                           |     |         |          |          |          |          |      |
|---------------------------------------------------------------------------|-----|---------|----------|----------|----------|----------|------|
| GSE22140_GERMFREE_VS_SPF_ARTHRITIC_MOUSE_CD4_TCELL_DN                     | 151 | 0.67677 | 2.397434 | 1.00E-10 | 2.81E-09 | 1.64E-09 | 865  |
| GSE22140_GERMFREE_VS_SPF_ARTHRITIC_MOUSE_CD4_TCELL_UP                     | 160 | 0.61586 | 2.199743 | 1.00E-10 | 2.81E-09 | 1.64E-09 | 2017 |
| GSE22140_GERMFREE_VS_SPF_MOUSE_CD4_TCELL_UP                               | 164 | 0.66735 | 2.385872 | 1.00E-10 | 2.81E-09 | 1.64E-09 | 1334 |
| GSE22196_HEALTHY_VS_OBESE_MOUSE_SKIN_GAMMA_DELTA_TCELL_UP                 | 155 | 0.62523 | 2.224474 | 1.00E-10 | 2.81E-09 | 1.64E-09 | 1499 |
| GSE22601_IMMATURE_CD4_SINGLE_POSITIVE_VS_CD8_SINGLE_POSITIVE_THYMOCYTE_DN | 163 | 0.62739 | 2.237395 | 1.00E-10 | 2.81E-09 | 1.64E-09 | 2862 |
| GSE22886_CTRL_VS_LPS_24H_DC_DN                                            | 160 | 0.66087 | 2.360508 | 1.00E-10 | 2.81E-09 | 1.64E-09 | 2012 |
| GSE22886_DAY0_VS_DAY1_MONOCYTE_IN_CULTURE_DN                              | 159 | 0.67091 | 2.389793 | 1.00E-10 | 2.81E-09 | 1.64E-09 | 1365 |
| GSE22886_DAY1_VS_DAY7_MONOCYTE_IN_CULTURE_UP                              | 163 | 0.63005 | 2.246904 | 1.00E-10 | 2.81E-09 | 1.64E-09 | 1561 |
| GSE22886_NAIVE_BCELL_VS_MONOCYTE_DN                                       | 163 | 0.64128 | 2.286937 | 1.00E-10 | 2.81E-09 | 1.64E-09 | 2147 |
| GSE22886_NAIVE_BCELL_VS_NEUTROPHIL_DN                                     | 173 | 0.70232 | 2.538644 | 1.00E-10 | 2.81E-09 | 1.64E-09 | 1505 |
| GSE22886_NAIVE_CD4_TCELL_VS_MONOCYTE_DN                                   | 162 | 0.68769 | 2.452152 | 1.00E-10 | 2.81E-09 | 1.64E-09 | 1825 |
| GSE22886_NAIVE_CD8_TCELL_VS_MONOCYTE_DN                                   | 166 | 0.71783 | 2.576232 | 1.00E-10 | 2.81E-09 | 1.64E-09 | 1745 |
| GSE22886_NAIVE_CD8_TCELL_VS_NEUTROPHIL_DN                                 | 159 | 0.63811 | 2.272944 | 1.00E-10 | 2.81E-09 | 1.64E-09 | 1838 |
| GSE22886_NAIVE_TCELL_VS_MONOCYTE_DN                                       | 167 | 0.67401 | 2.424123 | 1.00E-10 | 2.81E-09 | 1.64E-09 | 2287 |
| GSE22935_WT_VS_MYD88_KO_MACROPHAGE_48H_MB_OVIS_BCG_STIM_DN                | 165 | 0.60663 | 2.172804 | 1.00E-10 | 2.81E-09 | 1.64E-09 | 2014 |
| GSE22935_WT_VS_MYD88_KO_MACROPHAGE_UP                                     | 166 | 0.64508 | 2.315121 | 1.00E-10 | 2.81E-09 | 1.64E-09 | 2209 |
| GSE24634_IL4_VS_CTRL_TREATED_NAIVE_CD4_TCELL_DAY10_DN                     | 167 | 0.64639 | 2.324767 | 1.00E-10 | 2.81E-09 | 1.64E-09 | 1563 |
| GSE24634_IL4_VS_CTRL_TREATED_NAIVE_CD4_TCELL_DAY3_DN                      | 164 | 0.75711 | 2.706752 | 1.00E-10 | 2.81E-09 | 1.64E-09 | 1450 |
| GSE24634_IL4_VS_CTRL_TREATED_NAIVE_CD4_TCELL_DAY5_UP                      | 168 | 0.61093 | 2.198482 | 1.00E-10 | 2.81E-09 | 1.64E-09 | 2287 |
| GSE24634_TEFF_VS_TCONV_DAY10_IN_CULTURE_DN                                | 178 | 0.63526 | 2.312047 | 1.00E-10 | 2.81E-09 | 1.64E-09 | 2157 |
| GSE24634_TEFF_VS_TCONV_DAY3_IN_CULTURE_DN                                 | 157 | 0.71409 | 2.543325 | 1.00E-10 | 2.81E-09 | 1.64E-09 | 1317 |
| GSE24634_TEFF_VS_TCONV_DAY7_IN_CULTURE_DN                                 | 163 | 0.67466 | 2.405967 | 1.00E-10 | 2.81E-09 | 1.64E-09 | 1945 |
| GSE24634_TREG_VS_TCONV_POST_DAY10_IL4_CONVERSION_DN                       | 174 | 0.69034 | 2.494652 | 1.00E-10 | 2.81E-09 | 1.64E-09 | 1416 |

|                                                                         |     |         |          |          |          |          |      |
|-------------------------------------------------------------------------|-----|---------|----------|----------|----------|----------|------|
| GSE24634_TREG_VS_TCONV_POST_DAY3_IL4_CONVERSION_DN                      | 169 | 0.66153 | 2.378248 | 1.00E-10 | 2.81E-09 | 1.64E-09 | 1776 |
| GSE24634_TREG_VS_TCONV_POST_DAY5_IL4_CONVERSION_DN                      | 160 | 0.63018 | 2.250914 | 1.00E-10 | 2.81E-09 | 1.64E-09 | 1457 |
| GSE24634_TREG_VS_TCONV_POST_DAY7_IL4_CONVERSION_DN                      | 166 | 0.69228 | 2.484545 | 1.00E-10 | 2.81E-09 | 1.64E-09 | 1936 |
| GSE25085_FETAL_BM_VS_ADULT_BM_SP4_THYMIC_IMPLANT_UP                     | 163 | 0.60691 | 2.164375 | 1.00E-10 | 2.81E-09 | 1.64E-09 | 1999 |
| GSE25123_CTRL_VS_ROSIGLITAZONE_STIM_PPARG_KO_MACROPHAGE_UP              | 157 | 0.62491 | 2.225716 | 1.00E-10 | 2.81E-09 | 1.64E-09 | 1708 |
| GSE25123_IL4_VS_IL4_AND_ROSIGLITAZONE_STIM_PPARG_KO_MACROPHAGE_DAY10_DN | 146 | 0.65969 | 2.329574 | 1.00E-10 | 2.81E-09 | 1.64E-09 | 1945 |
| GSE25123_WT_VS_PPARG_KO_MACROPHAGE_UP                                   | 158 | 0.70697 | 2.515959 | 1.00E-10 | 2.81E-09 | 1.64E-09 | 1873 |
| GSE26343_UNSTIM_VS_LPS_STIM_NFAT5_KO_MACROPHAGE_DN                      | 161 | 0.69666 | 2.485307 | 1.00E-10 | 2.81E-09 | 1.64E-09 | 2287 |
| GSE2706_2H_VS_8H_R848_STIM_DC_DN                                        | 163 | 0.64569 | 2.302675 | 1.00E-10 | 2.81E-09 | 1.64E-09 | 1924 |
| GSE2706_R848_VS_R848_AND_LPS_2H_STIM_DC_DN                              | 148 | 0.67766 | 2.384869 | 1.00E-10 | 2.81E-09 | 1.64E-09 | 1383 |
| GSE2706_UNSTIM_VS_2H_LPS_AND_R848_DC_DN                                 | 147 | 0.70299 | 2.479694 | 1.00E-10 | 2.81E-09 | 1.64E-09 | 2081 |
| GSE2706_UNSTIM_VS_2H_LPS_DC_DN                                          | 148 | 0.66052 | 2.324539 | 1.00E-10 | 2.81E-09 | 1.64E-09 | 1933 |
| GSE2706_UNSTIM_VS_2H_R848_DC_DN                                         | 140 | 0.65404 | 2.2963   | 1.00E-10 | 2.81E-09 | 1.64E-09 | 2287 |
| GSE2706_UNSTIM_VS_8H_LPS_AND_R848_DC_DN                                 | 155 | 0.63046 | 2.2431   | 1.00E-10 | 2.81E-09 | 1.64E-09 | 1933 |
| GSE2706_UNSTIM_VS_8H_R848_DC_DN                                         | 150 | 0.71695 | 2.534307 | 1.00E-10 | 2.81E-09 | 1.64E-09 | 2023 |
| GSE29618_BCELL_VS_MDC_DAY7_FLU_VACCINE_DN                               | 168 | 0.61026 | 2.196069 | 1.00E-10 | 2.81E-09 | 1.64E-09 | 1513 |
| GSE29618_BCELL_VS_MDC_DN                                                | 171 | 0.6069  | 2.189103 | 1.00E-10 | 2.81E-09 | 1.64E-09 | 1569 |
| GSE29618_BCELL_VS_MONOCYTE_DN                                           | 172 | 0.61509 | 2.220005 | 1.00E-10 | 2.81E-09 | 1.64E-09 | 1733 |
| GSE29618_MONOCYTE_VS_MDC_DAY7_FLU_VACCINE_UP                            | 174 | 0.6521  | 2.356488 | 1.00E-10 | 2.81E-09 | 1.64E-09 | 2157 |
| GSE29618_MONOCYTE_VS_MDC_UP                                             | 169 | 0.68157 | 2.450261 | 1.00E-10 | 2.81E-09 | 1.64E-09 | 2125 |
| GSE29618_MONOCYTE_VS_PDC_DAY7_FLU_VACCINE_UP                            | 171 | 0.67266 | 2.426304 | 1.00E-10 | 2.81E-09 | 1.64E-09 | 1501 |
| GSE29618_MONOCYTE_VS_PDC_UP                                             | 172 | 0.69197 | 2.497474 | 1.00E-10 | 2.81E-09 | 1.64E-09 | 1416 |
| GSE29618_PDC_VS_MDC_DAY7_FLU_VACCINE_DN                                 | 169 | 0.68559 | 2.464739 | 1.00E-10 | 2.81E-09 | 1.64E-09 | 1720 |
| GSE29618_PDC_VS_MDC_DN                                                  | 168 | 0.70329 | 2.530864 | 1.00E-10 | 2.81E-09 | 1.64E-09 | 1696 |
| GSE32986_CURDLAN_HIGHDOSE_VS_GMCSF_AND_CURDLAN_HIGHDOSE_STIM_DC_DN      | 167 | 0.66063 | 2.375999 | 1.00E-10 | 2.81E-09 | 1.64E-09 | 2060 |

|                                                                                |     |         |          |          |          |          |      |
|--------------------------------------------------------------------------------|-----|---------|----------|----------|----------|----------|------|
| GSE34156_NOD2_LIGAND_VS_TLR1_TLR2_LIGAND_6H_TREATED_MONOCYTE_DN                | 156 | 0.67847 | 2.414872 | 1.00E-10 | 2.81E-09 | 1.64E-09 | 1733 |
| GSE34156_TLR1_TLR2_LIGAND_VS_NOD2_AND_TLR1_TLR2_LIGAND_24H_TREATED_MONOCYTE_UP | 160 | 0.65822 | 2.351042 | 1.00E-10 | 2.81E-09 | 1.64E-09 | 1733 |
| GSE34156_UNTREATED_VS_24H_NOD2_LIGAND_TREATED_MONOCYTE_DN                      | 155 | 0.66821 | 2.377384 | 1.00E-10 | 2.81E-09 | 1.64E-09 | 1745 |
| GSE34156_UNTREATED_VS_6H_TLR1_TLR2_LIGAND_TREATED_MONOCYTE_UP                  | 155 | 0.64896 | 2.308913 | 1.00E-10 | 2.81E-09 | 1.64E-09 | 1745 |
| GSE34392_ST2_KO_VS_WT_DAY8_LCMV_EFFECTOR_CD8_TCELL_DN                          | 163 | 0.61065 | 2.17772  | 1.00E-10 | 2.81E-09 | 1.64E-09 | 1935 |
| GSE3565_CTRL_VS_LPS_INJECTED_DUSP1_KO_SPLENOCYTES_UP                           | 146 | 0.64587 | 2.280772 | 1.00E-10 | 2.81E-09 | 1.64E-09 | 2061 |
| GSE35685_CD34POS_CD10NEG_CD62LPOS_VS_CD34POS_CD10POS_BONE_MARROW_DN            | 156 | 0.63117 | 2.246523 | 1.00E-10 | 2.81E-09 | 1.64E-09 | 2044 |
| GSE360_CTRL_VS_M_TUBERCULOSIS_DC_DN                                            | 152 | 0.66818 | 2.367838 | 1.00E-10 | 2.81E-09 | 1.64E-09 | 1504 |
| GSE360_HIGH_DOSE_B_MALAYI_VS_M_TUBERCULOSIS_DC_DN                              | 162 | 0.70154 | 2.501541 | 1.00E-10 | 2.81E-09 | 1.64E-09 | 2226 |
| GSE360_HIGH_DOSE_B_MALAYI_VS_M_TUBERCULOSIS_MAC_DN                             | 159 | 0.65246 | 2.324085 | 1.00E-10 | 2.81E-09 | 1.64E-09 | 682  |
| GSE360_LOW_DOSE_B_MALAYI_VS_M_TUBERCULOSIS_DC_DN                               | 157 | 0.681   | 2.425476 | 1.00E-10 | 2.81E-09 | 1.64E-09 | 1487 |
| GSE360_L_DONOVANI_VS_M_TUBERCULOSIS_DC_DN                                      | 166 | 0.61703 | 2.214479 | 1.00E-10 | 2.81E-09 | 1.64E-09 | 1520 |
| GSE360_L_DONOVANI_VS_M_TUBERCULOSIS_MAC_DN                                     | 173 | 0.66243 | 2.39443  | 1.00E-10 | 2.81E-09 | 1.64E-09 | 1707 |
| GSE360_T_GONDII_VS_B_MALAYI_HIGH_DOSE_DC_UP                                    | 161 | 0.62025 | 2.212723 | 1.00E-10 | 2.81E-09 | 1.64E-09 | 1960 |
| GSE360_T_GONDII_VS_M_TUBERCULOSIS_DC_DN                                        | 162 | 0.63403 | 2.260817 | 1.00E-10 | 2.81E-09 | 1.64E-09 | 1450 |
| GSE36888_UNTREATED_VS_IL2_TREATED_STAT5_AB_KNOCKIN_TCELL_2H_UP                 | 160 | 0.69081 | 2.467458 | 1.00E-10 | 2.81E-09 | 1.64E-09 | 1534 |
| GSE36888_UNTREATED_VS_IL2_TREATED_TCELL_17H_DN                                 | 154 | 0.67972 | 2.419915 | 1.00E-10 | 2.81E-09 | 1.64E-09 | 1933 |
| GSE36888_UNTREATED_VS_IL2_TREATED_TCELL_6H_UP                                  | 145 | 0.65353 | 2.301937 | 1.00E-10 | 2.81E-09 | 1.64E-09 | 1867 |
| GSE37301_HEMATOPOIETIC_STEM_CELL_VS_CD4_TCELL_UP                               | 145 | 0.67331 | 2.371609 | 1.00E-10 | 2.81E-09 | 1.64E-09 | 1455 |
| GSE37533_PPARG1_FOXP3_VS_FOXP3_TRANSDUCECD4_TCELL_DN                           | 173 | 0.65938 | 2.383435 | 1.00E-10 | 2.81E-09 | 1.64E-09 | 2565 |

|                                                                                        |     |         |          |          |          |          |      |
|----------------------------------------------------------------------------------------|-----|---------|----------|----------|----------|----------|------|
| GSE37533_PPARG1_FOXP3_VS_PPARG2_FOXP3_TRANSDU<br>CED_CD4_TCELL_PIOGLITAZONE_TREATED_DN | 170 | 0.65805 | 2.365407 | 1.00E-10 | 2.81E-09 | 1.64E-09 | 1654 |
| GSE37533_PPARG2_FOXP3_VS_FOXP3_TRANSDU<br>CED_CD4_TCELL_DN                             | 165 | 0.66684 | 2.388463 | 1.00E-10 | 2.81E-09 | 1.64E-09 | 1504 |
| GSE37533_UNTREATED_VS_PIOGLITAZONE_TREATED_<br>CD4_TCELL_PPARG1_AND_FOXP3_TRASDUCED_UP | 173 | 0.63534 | 2.296522 | 1.00E-10 | 2.81E-09 | 1.64E-09 | 1475 |
| GSE3982_CTRL_VS_LPS_48H_DC_DN                                                          | 158 | 0.65979 | 2.348059 | 1.00E-10 | 2.81E-09 | 1.64E-09 | 1751 |
| GSE3982_CTRL_VS_LPS_4H_MAC_DN                                                          | 158 | 0.63648 | 2.265076 | 1.00E-10 | 2.81E-09 | 1.64E-09 | 2227 |
| GSE40274_CTRL_VS_FOXP3_TRANSDU<br>CED_ACTIVATED_CD4_TCELL_DN                           | 163 | 0.61915 | 2.20802  | 1.00E-10 | 2.81E-09 | 1.64E-09 | 1619 |
| GSE40685_TREG_VS_FOXP3_KO_TREG_PRECURSOR_DN                                            | 158 | 0.70342 | 2.503315 | 1.00E-10 | 2.81E-09 | 1.64E-09 | 1383 |
| GSE40685_TREG_VS_FOXP3_KO_TREG_PRECURSOR_UP                                            | 154 | 0.67888 | 2.416912 | 1.00E-10 | 2.81E-09 | 1.64E-09 | 1984 |
| GSE41087_WT_VS_FOXP3_MUT_ANTI_CD3_CD28_STIM_<br>CD4_TCELL_UP                           | 159 | 0.63163 | 2.249872 | 1.00E-10 | 2.81E-09 | 1.64E-09 | 1709 |
| GSE41176_UNSTIM_VS_ANTI_IGM_STIM_BCELL_1H_UP                                           | 166 | 0.68142 | 2.445546 | 1.00E-10 | 2.81E-09 | 1.64E-09 | 1571 |
| GSE41176_UNSTIM_VS_ANTI_IGM_STIM_BCELL_3H_UP                                           | 172 | 0.69494 | 2.508204 | 1.00E-10 | 2.81E-09 | 1.64E-09 | 1933 |
| GSE41176_WT_VS_TAK1_KO_ANTI_IGM_STIM_BCELL_6<br>H_DN                                   | 163 | 0.66426 | 2.3689   | 1.00E-10 | 2.81E-09 | 1.64E-09 | 1707 |
| GSE41978_ID2_KO_VS_BIM_KO_KLRG1_LOW_EFFECTO<br>R_CD8_TCELL_UP                          | 161 | 0.67934 | 2.423534 | 1.00E-10 | 2.81E-09 | 1.64E-09 | 2039 |
| GSE42021_CD24HI_VS_CD24INT_TCONV_THYMUS_DN                                             | 158 | 0.65417 | 2.32805  | 1.00E-10 | 2.81E-09 | 1.64E-09 | 1418 |
| GSE42021_CD24HI_VS_CD24INT_TREG_THYMUS_DN                                              | 161 | 0.67728 | 2.416184 | 1.00E-10 | 2.81E-09 | 1.64E-09 | 2049 |
| GSE42021_CD24HI_VS_CD24LOW_TCONV_THYMUS_DN                                             | 159 | 0.72436 | 2.580182 | 1.00E-10 | 2.81E-09 | 1.64E-09 | 1609 |
| GSE42021_CD24INT_VS_CD24LOW_TCONV_THYMUS_UP                                            | 152 | 0.63945 | 2.265997 | 1.00E-10 | 2.81E-09 | 1.64E-09 | 2410 |
| GSE42021_TCONV_PLN_VS_CD24HI_TCONV_THYMUS_U<br>P                                       | 164 | 0.71053 | 2.540247 | 1.00E-10 | 2.81E-09 | 1.64E-09 | 1620 |
| GSE42021_TCONV_PLN_VS_TREG_PRECURSORS_THYM<br>US_DN                                    | 168 | 0.60768 | 2.186802 | 1.00E-10 | 2.81E-09 | 1.64E-09 | 1935 |
| GSE42021_TREG_PLN_VS_CD24INT_TREG_THYMUS_DN                                            | 166 | 0.70617 | 2.534397 | 1.00E-10 | 2.81E-09 | 1.64E-09 | 1559 |
| GSE42021_TREG_VS_TCONV_PLN_UP                                                          | 166 | 0.71588 | 2.569212 | 1.00E-10 | 2.81E-09 | 1.64E-09 | 1513 |
| GSE42088_UNINF_VS_LEISHMANIA_INF_DC_2H_UP                                              | 173 | 0.62574 | 2.261819 | 1.00E-10 | 2.81E-09 | 1.64E-09 | 1975 |
| GSE42724_NAIVE_BCELL_VS_PLASMABLAST_UP                                                 | 156 | 0.64824 | 2.307268 | 1.00E-10 | 2.81E-09 | 1.64E-09 | 2360 |
| GSE43863_NAIVE_VS_MEMORY_TH1_CD4_TCELL_D150_<br>LCMV_UP                                | 124 | 0.70346 | 2.436594 | 1.00E-10 | 2.81E-09 | 1.64E-09 | 1308 |
| GSE45365_NK_CELL_VS_BCELL_UP                                                           | 165 | 0.61861 | 2.21571  | 1.00E-10 | 2.81E-09 | 1.64E-09 | 1945 |

|                                                                       |     |         |          |          |          |          |      |
|-----------------------------------------------------------------------|-----|---------|----------|----------|----------|----------|------|
| GSE45365_NK_CELL_VS_CD11B_DC_DN                                       | 162 | 0.68583 | 2.445527 | 1.00E-10 | 2.81E-09 | 1.64E-09 | 1683 |
| GSE5589_LPS_AND_IL10_VS_LPS_AND_IL6_STIM_IL6_KO_MACROPHAGE_45MIN_UP   | 167 | 0.6534  | 2.349985 | 1.00E-10 | 2.81E-09 | 1.64E-09 | 1601 |
| GSE6269_HEALTHY_VS_STAPH_PNEUMO_INF_PBMC_D                            | 143 | 0.646   | 2.274306 | 1.00E-10 | 2.81E-09 | 1.64E-09 | 1424 |
| GSE7218_IGM_VS_IGG_SIGNAL_THROUGH_ANTIGEN_BCELL_DN                    | 143 | 0.71673 | 2.523317 | 1.00E-10 | 2.81E-09 | 1.64E-09 | 1862 |
| GSE7218_UNSTIM_VS_ANTIGEN_STIM_THROUGH_IGG_BCELL_DN                   | 139 | 0.74062 | 2.596625 | 1.00E-10 | 2.81E-09 | 1.64E-09 | 1918 |
| GSE7509_DC_VS_MONOCYTE_WITH_FCGRIIB_STIM_DN                           | 168 | 0.63083 | 2.270113 | 1.00E-10 | 2.81E-09 | 1.64E-09 | 1438 |
| GSE7509_UNSTIM_VS_FCGRIIB_STIM_DC_DN                                  | 148 | 0.68922 | 2.425537 | 1.00E-10 | 2.81E-09 | 1.64E-09 | 1997 |
| GSE7509_UNSTIM_VS_IFNA_STIM_IMMATURE_DC_DN                            | 140 | 0.71399 | 2.506747 | 1.00E-10 | 2.81E-09 | 1.64E-09 | 2136 |
| GSE7548_NAIVE_VS_DAY7_PCC_IMMUNIZATION_CD4_TCELL_DN                   | 168 | 0.62719 | 2.256986 | 1.00E-10 | 2.81E-09 | 1.64E-09 | 1308 |
| GSE8515_IL1_VS_IL6_4H_STIM_MAC_UP                                     | 176 | 0.63498 | 2.300243 | 1.00E-10 | 2.81E-09 | 1.64E-09 | 2173 |
| GSE8835_CD4_VS_CD8_TCELL_CLL_PATIENT_UP                               | 162 | 0.64517 | 2.300518 | 1.00E-10 | 2.81E-09 | 1.64E-09 | 1635 |
| GSE9006_HEALTHY_VS_TYPE_1_DIABETES_PBMC_AT_DX_DN                      | 163 | 0.61705 | 2.200537 | 1.00E-10 | 2.81E-09 | 1.64E-09 | 1429 |
| GSE9316_IL6_KO_VS_IFNG_KO_INVIVO_EXPANDED_CD4_TCELL_DN                | 171 | 0.66139 | 2.385646 | 1.00E-10 | 2.81E-09 | 1.64E-09 | 1734 |
| GSE9601_NFKB_INHIBITOR_VS_PI3K_INHIBITOR_TREATED_HCMV_INF_MONOCYTE_DN | 171 | 0.66696 | 2.405757 | 1.00E-10 | 2.81E-09 | 1.64E-09 | 1231 |
| GSE9960_HEALTHY_VS_GRAM_NEG_SEPSIS_PBMC_DN                            | 161 | 0.65483 | 2.33607  | 1.00E-10 | 2.81E-09 | 1.64E-09 | 2272 |
| GSE9988_ANTI_TREM1_AND_LPS_VS_VEHICLE_TREATED_MONOCYTES_UP            | 138 | 0.64406 | 2.254316 | 1.00E-10 | 2.81E-09 | 1.64E-09 | 2060 |
| GSE9988_ANTI_TREM1_VS_ANTI_TREM1_AND_LPS_MONOCYTE_DN                  | 140 | 0.70893 | 2.489001 | 1.00E-10 | 2.81E-09 | 1.64E-09 | 2287 |
| GSE9988_ANTI_TREM1_VS_LOW_LPS_MONOCYTE_DN                             | 154 | 0.70366 | 2.505143 | 1.00E-10 | 2.81E-09 | 1.64E-09 | 1960 |
| GSE9988_ANTI_TREM1_VS_LPS_MONOCYTE_DN                                 | 155 | 0.70575 | 2.510969 | 1.00E-10 | 2.81E-09 | 1.64E-09 | 2322 |
| GSE9988_LOW_LPS_VS_CTRL_TREATED_MONOCYTE_UP                           | 145 | 0.73783 | 2.598863 | 1.00E-10 | 2.81E-09 | 1.64E-09 | 1939 |
| GSE9988_LOW_LPS_VS_VEHICLE_TREATED_MONOCYTE_UP                        | 145 | 0.72713 | 2.561179 | 1.00E-10 | 2.81E-09 | 1.64E-09 | 1560 |
| GSE9988_LPS_VS_CTRL_TREATED_MONOCYTE_UP                               | 141 | 0.72377 | 2.545831 | 1.00E-10 | 2.81E-09 | 1.64E-09 | 2226 |
| GSE9988_LPS_VS_LPS_AND_ANTI_TREM1_MONOCYTE_UP                         | 163 | 0.62908 | 2.243429 | 1.00E-10 | 2.81E-09 | 1.64E-09 | 2287 |

|                                                                            |     |         |          |          |          |          |      |
|----------------------------------------------------------------------------|-----|---------|----------|----------|----------|----------|------|
| GSE9988_LPS_VS_VEHICLE_TREATED_MONOCYTE_UP                                 | 141 | 0.73473 | 2.584369 | 1.00E-10 | 2.81E-09 | 1.64E-09 | 1939 |
| HALLMARK_ALLOGRAFT_REJECTION                                               | 166 | 0.73712 | 2.645457 | 1.00E-10 | 2.81E-09 | 1.64E-09 | 1422 |
| HALLMARK_COMPLEMENT                                                        | 171 | 0.67908 | 2.449459 | 1.00E-10 | 2.81E-09 | 1.64E-09 | 1471 |
| HALLMARK_EPITHELIAL_MESENCHYMAL_TRANSITIO                                  | 186 | 0.71075 | 2.596607 | 1.00E-10 | 2.81E-09 | 1.64E-09 | 1904 |
| HALLMARK_IL6_JAK_STAT3_SIGNALING                                           | 75  | 0.77913 | 2.513309 | 1.00E-10 | 2.81E-09 | 1.64E-09 | 1428 |
| HALLMARK_INFLAMMATORY_RESPONSE                                             | 179 | 0.74451 | 2.713036 | 1.00E-10 | 2.81E-09 | 1.64E-09 | 1582 |
| HALLMARK_INTERFERON_ALPHA_RESPONSE                                         | 82  | 0.73457 | 2.398404 | 1.00E-10 | 2.81E-09 | 1.64E-09 | 1383 |
| HALLMARK_INTERFERON_GAMMA_RESPONSE                                         | 163 | 0.74508 | 2.657112 | 1.00E-10 | 2.81E-09 | 1.64E-09 | 1308 |
| HALLMARK_KRAS_SIGNALING_UP                                                 | 179 | 0.59879 | 2.182023 | 1.00E-10 | 2.81E-09 | 1.64E-09 | 1648 |
| HALLMARK_OXIDATIVE_PHOSPHORYLATION                                         | 171 | -0.6045 | -2.61346 | 1.00E-10 | 2.81E-09 | 1.64E-09 | 2730 |
| HALLMARK_TNFA_SIGNALING_VIA_NFKB                                           | 172 | 0.736   | 2.656381 | 1.00E-10 | 2.81E-09 | 1.64E-09 | 1245 |
| KAECH_NAIVE_VS_DAY15_EFF_CD8_TCELL_DN                                      | 162 | 0.64409 | 2.296669 | 1.00E-10 | 2.81E-09 | 1.64E-09 | 1125 |
| GSE42724_MEMORY_VS_B1_BCELL_DN                                             | 145 | 0.62463 | 2.200115 | 1.03E-10 | 2.89E-09 | 1.68E-09 | 1960 |
| GSE18791_CTRL_VS_NEWCASTLE_VIRUS_DC_12H_DN                                 | 150 | 0.62601 | 2.212843 | 1.06E-10 | 2.94E-09 | 1.71E-09 | 1924 |
| GSE22886_DC_VS_MONOCYTE_DN                                                 | 160 | 0.61548 | 2.198392 | 1.10E-10 | 3.03E-09 | 1.76E-09 | 2226 |
| GSE15330_MEGAKARYOCYTE_ERYTHROID_VS_GRANU<br>LOCYTE_MONOCYTE_PROGENITOR_UP | 155 | 0.62005 | 2.206067 | 1.16E-10 | 3.18E-09 | 1.85E-09 | 2073 |
| GSE42021_TREG_PLN_VS_CD24INT_TREG_THYMUS_UP                                | 171 | 0.59888 | 2.160192 | 1.27E-10 | 3.48E-09 | 2.03E-09 | 1939 |
| GSE3982_MEMORY_CD4_TCELL_VS_BCELL_UP                                       | 154 | 0.61571 | 2.192007 | 1.36E-10 | 3.69E-09 | 2.15E-09 | 1569 |
| GSE35825_UNTREATED_VS_IFNG_STIM_MACROPHAGE_<br>UP                          | 161 | 0.61446 | 2.192073 | 1.37E-10 | 3.69E-09 | 2.15E-09 | 1960 |
| GSE39556_CD8A_DC_VS_NK_CELL_DN                                             | 161 | 0.61405 | 2.190581 | 1.37E-10 | 3.69E-09 | 2.15E-09 | 1613 |
| GSE14000_UNSTIM_VS_16H_LPS_DC_TRANSLATED_RN<br>A_DN                        | 149 | 0.61902 | 2.188145 | 1.74E-10 | 4.66E-09 | 2.71E-09 | 2578 |
| GSE21670_STAT3_KO_VS_WT_CD4_TCELL_UP                                       | 162 | 0.60273 | 2.149199 | 1.85E-10 | 4.91E-09 | 2.86E-09 | 1917 |
| GSE42088_UNINF_VS_LEISHMANIA_INF_DC_8H_UP                                  | 167 | 0.5988  | 2.153608 | 1.89E-10 | 5.00E-09 | 2.91E-09 | 1380 |
| GSE27434_WT_VS_DNMT1_KO_TREG_DN                                            | 166 | 0.6079  | 2.181692 | 2.02E-10 | 5.31E-09 | 3.09E-09 | 1933 |
| GSE42021_TREG_PLN_VS_TREG_PRECURSORS_THYMUS<br>DN                          | 168 | 0.60004 | 2.15931  | 2.06E-10 | 5.38E-09 | 3.13E-09 | 1519 |
| GSE43955_1H_VS_20H_ACT_CD4_TCELL_WITH_TGFB_IL<br>6_DN                      | 171 | 0.59504 | 2.146336 | 2.10E-10 | 5.46E-09 | 3.18E-09 | 1894 |
| GSE9988_ANTI_TREM1_AND_LPS_VS_CTRL_TREATED_<br>MONOCYTES_UP                | 143 | 0.62625 | 2.204756 | 2.35E-10 | 6.08E-09 | 3.54E-09 | 2452 |
| GSE1112_HY_CD8AB_VS_HY_CD8AA_THYMOCYTE_RTO<br>C_CULTURE_UP                 | 138 | 0.62624 | 2.191952 | 2.53E-10 | 6.51E-09 | 3.79E-09 | 1926 |

|                                                                  |     |         |          |          |          |          |      |
|------------------------------------------------------------------|-----|---------|----------|----------|----------|----------|------|
| GSE14769_UNSTIM_VS_40MIN_LPS_BMDM_DN                             | 157 | 0.61414 | 2.187364 | 2.56E-10 | 6.55E-09 | 3.82E-09 | 2007 |
| GSE39864_WT_VS_GATA3_KO_TREG_UP                                  | 163 | 0.59937 | 2.137478 | 2.57E-10 | 6.55E-09 | 3.82E-09 | 1904 |
| GSE19888_ADENOSINE_A3R_INH_VS_TCELL_MEMBRANES_ACT_MAST_CELL_UP   | 150 | 0.61958 | 2.190128 | 2.60E-10 | 6.60E-09 | 3.84E-09 | 1792 |
| GSE32986_CURDLAN_LOWDOSE_VS_CURDLAN_HIGHDOSE_STIM_DC_DN          | 168 | 0.59831 | 2.153068 | 2.71E-10 | 6.85E-09 | 3.99E-09 | 1517 |
| GSE360_DC_VS_MAC_B_MALAYI_HIGH_DOSE_DN                           | 168 | 0.59807 | 2.152216 | 2.86E-10 | 7.19E-09 | 4.18E-09 | 1732 |
| GSE30971_WBP7_HET_VS_KO_MACROPHAGE_DN                            | 152 | 0.61691 | 2.18613  | 3.17E-10 | 7.93E-09 | 4.61E-09 | 1590 |
| GSE29617_CTRL_VS_DAY7_TIV_FLU_VACCINE_PBMC_2008_UP               | 158 | 0.61293 | 2.181262 | 3.20E-10 | 7.96E-09 | 4.63E-09 | 1966 |
| GSE24142_EARLY_THYMIC_PROGENITOR_VS_DN2_THYMOCYTE_UP             | 170 | 0.59474 | 2.137828 | 3.36E-10 | 8.32E-09 | 4.84E-09 | 2083 |
| GSE21670_UNTREATED_VS_IL6_TREATED_STAT3_KO_CD4_TCELL_UP          | 170 | 0.59402 | 2.135248 | 3.61E-10 | 8.83E-09 | 5.14E-09 | 2304 |
| GSE42088_UNINF_VS_LEISHMANIA_INF_DC_24H_DN                       | 172 | 0.58666 | 2.117399 | 3.62E-10 | 8.83E-09 | 5.14E-09 | 1975 |
| GSE18791_UNSTIM_VS_NEWCATSLE_VIRUS_DC_6H_DN                      | 152 | 0.61573 | 2.18195  | 3.62E-10 | 8.83E-09 | 5.14E-09 | 2430 |
| GSE6259_33D1_POS_DC_VS_CD4_TCELL_DN                              | 147 | 0.62417 | 2.201652 | 3.76E-10 | 9.12E-09 | 5.31E-09 | 2262 |
| GSE43863_DAY6_EFF_VS_DAY150_MEM_TH1_CD4_TCELL_DN                 | 162 | 0.59776 | 2.131465 | 4.06E-10 | 9.80E-09 | 5.70E-09 | 1953 |
| GSE35825_UNTREATED_VS_IFNA_STIM_MACROPHAGE_DN                    | 141 | 0.63003 | 2.216115 | 4.32E-10 | 1.04E-08 | 6.03E-09 | 1939 |
| GSE14386_UNTREATED_VS_IFNA_TREATED_ACT_PBMC_MS_PATIENT_DN        | 126 | 0.64244 | 2.227696 | 4.70E-10 | 1.12E-08 | 6.54E-09 | 1609 |
| GSE7348_UNSTIM_VS_LPS_STIM_MACROPHAGE_DN                         | 153 | 0.61398 | 2.178674 | 4.79E-10 | 1.14E-08 | 6.63E-09 | 1820 |
| GSE40274_CTRL_VS_FOXP3_AND_LEF1_TRANSDUCEDACTIVATED_CD4_TCELL_UP | 138 | 0.62154 | 2.175491 | 5.03E-10 | 1.19E-08 | 6.93E-09 | 1886 |
| GSE21360_NAIVE_VS_SECONDARY_MEMORY_CD8_TCELL_UP                  | 147 | 0.62191 | 2.19369  | 5.33E-10 | 1.25E-08 | 7.30E-09 | 1359 |
| GSE2706_R848_VS_LPS_8H_STIM_DC_DN                                | 146 | 0.61616 | 2.175868 | 5.52E-10 | 1.29E-08 | 7.53E-09 | 1960 |
| GSE46606_IRF4_KO_VS_WT_UNSTIM_BCELL_DN                           | 160 | 0.60389 | 2.157006 | 5.62E-10 | 1.31E-08 | 7.63E-09 | 1707 |
| GSE41867_MEMORY_VS_EXHAUSTED_CD8_TCELL_DAY30_LCMV_UP             | 170 | 0.59007 | 2.121047 | 6.07E-10 | 1.41E-08 | 8.20E-09 | 1681 |
| GSE23308_WT_VS_MINERALCORTICOID_REC_KO_MACROPHAGE_DN             | 173 | 0.58319 | 2.108013 | 6.38E-10 | 1.47E-08 | 8.58E-09 | 2570 |

|                                                                     |     |         |          |          |          |          |      |
|---------------------------------------------------------------------|-----|---------|----------|----------|----------|----------|------|
| GSE36527_CD69_NEG_VS_POS_TREG_CD62L_LOS_KLRG1_NEG_UP                | 165 | 0.59524 | 2.132021 | 6.52E-10 | 1.50E-08 | 8.73E-09 | 2347 |
| GSE6269_FLU_VS_STAPH_AUREUS_INF_PBMCDN                              | 143 | 0.61747 | 2.173856 | 6.64E-10 | 1.52E-08 | 8.85E-09 | 2135 |
| GSE36888_STAT5_AB_KNOCKIN_VS_WT_TCELL_IL2_TREATED_17H_DN            | 169 | 0.58975 | 2.120174 | 6.67E-10 | 1.52E-08 | 8.85E-09 | 1563 |
| GSE30971_CTRL_VS_LPS_STIM_MACROPHAGE_WBP7_KO_2H_UP                  | 147 | 0.62044 | 2.188495 | 6.75E-10 | 1.53E-08 | 8.91E-09 | 1924 |
| GSE35685_CD34POS_CD38NEG_VS_CD34POS_CD10POS_BONE_MARROW_DN          | 162 | 0.59439 | 2.119461 | 7.06E-10 | 1.59E-08 | 9.28E-09 | 2070 |
| GSE26495_NAIVE_VS_PD1LOW_CD8_TCELL_DN                               | 163 | 0.59297 | 2.114668 | 7.27E-10 | 1.63E-08 | 9.51E-09 | 2127 |
| GSE17974_IL4_AND_ANTI_IL12_VS_UNTREATED_24H_ACT_CD4_TCELL_DN        | 141 | 0.62587 | 2.20145  | 7.35E-10 | 1.64E-08 | 9.54E-09 | 1254 |
| GSE10325_LUPUS_BCELL_VS_LUPUS_MYELOID_DN                            | 166 | 0.601   | 2.15693  | 7.36E-10 | 1.64E-08 | 9.54E-09 | 2303 |
| GSE36826_WT_VS_IL1R_KO_SKIN_STAPH_AUREUS_INF_DN                     | 161 | 0.60422 | 2.155538 | 7.53E-10 | 1.67E-08 | 9.72E-09 | 2452 |
| GSE30971_WBP7_HET_VS_KO_MACROPHAGE_2H_LPS_STIM_DN                   | 157 | 0.60727 | 2.162872 | 7.93E-10 | 1.75E-08 | 1.02E-08 | 1918 |
| GSE10325_CD4_TCELL_VS_BCELL_DN                                      | 148 | 0.60662 | 2.134861 | 8.54E-10 | 1.88E-08 | 1.09E-08 | 1643 |
| GSE14769_UNSTIM_VS_60MIN_LPS_BMDM_DN                                | 156 | 0.60426 | 2.150737 | 8.74E-10 | 1.91E-08 | 1.11E-08 | 1888 |
| GSE34515_CD16_NEG_MONOCYTE_VS_DC_UP                                 | 160 | 0.5998  | 2.142384 | 9.29E-10 | 2.02E-08 | 1.18E-08 | 2395 |
| GSE4748_CTRL_VS_LPS_STIM_DC_3H_UP                                   | 163 | 0.59213 | 2.111665 | 9.38E-10 | 2.03E-08 | 1.18E-08 | 1427 |
| GSE3565_DUSP1_VS_WT_SPLENOCYTES_UP                                  | 133 | 0.62678 | 2.194924 | 9.55E-10 | 2.06E-08 | 1.20E-08 | 1914 |
| GSE1460_DP_VS_CD4_THYMOCYTE_DN                                      | 163 | 0.59177 | 2.110366 | 9.78E-10 | 2.10E-08 | 1.22E-08 | 1567 |
| GSE19198_1H_VS_6H_IL21_TREATED_TCELL_DN                             | 166 | 0.5993  | 2.150817 | 9.83E-10 | 2.10E-08 | 1.22E-08 | 1807 |
| GSE12366_GC_VS_NAIVE_BCELL_DN                                       | 138 | 0.6157  | 2.155064 | 1.06E-09 | 2.26E-08 | 1.32E-08 | 1609 |
| GSE26343_WT_VS_NFAT5_KO_MACROPHAGE_DN                               | 161 | 0.60185 | 2.147058 | 1.07E-09 | 2.26E-08 | 1.32E-08 | 1682 |
| GSE1740_UNSTIM_VS_IFNA_STIMULATED_MCSF_DERIVED_MACROPHAGE_DN        | 140 | 0.61538 | 2.160566 | 1.07E-09 | 2.26E-08 | 1.32E-08 | 1926 |
| GSE23502_BM_VS_COLON_TUMOR_MYELOID_DERIVED_SUPPRESSOR_CELL_UP       | 159 | 0.59919 | 2.134325 | 1.07E-09 | 2.26E-08 | 1.32E-08 | 1543 |
| GSE29618_BCELL_VS_PDC_UP                                            | 148 | 0.60488 | 2.128729 | 1.12E-09 | 2.35E-08 | 1.37E-08 | 2553 |
| GSE19401_UNSTIM_VS_RETINOIC_ACID_AND_PAM2CSK4_STIM_FOLLICULAR_DC_DN | 168 | 0.58987 | 2.122713 | 1.16E-09 | 2.41E-08 | 1.40E-08 | 1520 |
| GSE23568_CTRL_TRANSDUCED_VS_WT_CD8_TCELL_UP                         | 170 | 0.586   | 2.106419 | 1.20E-09 | 2.49E-08 | 1.45E-08 | 2212 |
| GSE2706_UNSTIM_VS_8H_LPS_DC_DN                                      | 149 | 0.60696 | 2.145531 | 1.21E-09 | 2.51E-08 | 1.46E-08 | 2509 |

|                                                                                       |     |         |          |          |          |          |      |
|---------------------------------------------------------------------------------------|-----|---------|----------|----------|----------|----------|------|
| GSE15330_LYMPHOID_MULTIPOTENT_VS_MEGAKARYO<br>CYTE_ERYTHROID_PROGENITOR_IKAROS_KO_DN  | 150 | 0.60939 | 2.154085 | 1.24E-09 | 2.54E-08 | 1.48E-08 | 1169 |
| GSE13946_CTRL_VS_DSS_COLITIS_GD_TCELL_FROM_C<br>OLON_UP                               | 153 | 0.60583 | 2.149757 | 1.33E-09 | 2.74E-08 | 1.59E-08 | 2103 |
| GSE2770_TGFB_AND_IL4_ACT_VS_ACT_CD4_TCELL_2H<br>_DN                                   | 165 | 0.58936 | 2.110937 | 1.37E-09 | 2.80E-08 | 1.63E-08 | 2598 |
| GSE360_DC_VS_MAC_M_TUBERCULOSIS_UP                                                    | 159 | 0.59686 | 2.126021 | 1.38E-09 | 2.80E-08 | 1.63E-08 | 1461 |
| GSE22140_HEALTHY_VS_ARTHRITIC_GERMFREE_MOUS<br>E_CD4_TCELL_DN                         | 169 | 0.58496 | 2.102946 | 1.38E-09 | 2.80E-08 | 1.63E-08 | 1662 |
| GSE13484_12H_UNSTIM_VS_YF17D_VACCINE_STIM_PB<br>MC_DN                                 | 171 | 0.58053 | 2.093979 | 1.41E-09 | 2.84E-08 | 1.65E-08 | 2074 |
| GSE360_L_MAJOR_VS_B_MALAYI_HIGH_DOSE_MAC_UP                                           | 161 | 0.60009 | 2.14078  | 1.51E-09 | 3.04E-08 | 1.77E-08 | 1313 |
| GSE25088_ROSIGLITAZONE_VS_IL4_AND_ROSIGLITAZO<br>NE_STIM_STAT6_KO_MACROPHAGE_DAY10_DN | 151 | 0.60517 | 2.143798 | 1.55E-09 | 3.10E-08 | 1.81E-08 | 2503 |
| GSE25088_IL4_VS_IL4_AND_ROSIGLITAZONE_STIM_STA<br>T6_KO_MACROPHAGE_DAY10_DN           | 153 | 0.60396 | 2.143106 | 1.65E-09 | 3.30E-08 | 1.92E-08 | 2060 |
| GSE27859_MACROPHAGE_VS_DC_UP                                                          | 142 | 0.61322 | 2.154191 | 1.81E-09 | 3.60E-08 | 2.10E-08 | 2272 |
| GSE42021_CD24HI_TREG_VS_CD24HI_TCONV_THYMUS_<br>DN                                    | 162 | 0.58909 | 2.100574 | 1.82E-09 | 3.60E-08 | 2.10E-08 | 1933 |
| GSE10325_CD4_TCELL_VS_MYELOID_UP                                                      | 161 | 0.59859 | 2.135428 | 1.84E-09 | 3.61E-08 | 2.10E-08 | 2208 |
| GSE39556_UNTREATED_VS_3H_POLYIC_INJ_MOUSE_CD<br>8A_DC_UP                              | 169 | 0.58114 | 2.08924  | 2.00E-09 | 3.91E-08 | 2.28E-08 | 1725 |
| GSE2935_UV_INACTIVATED_VS_LIVE_SENDAI_VIRUS_I<br>NF_MACROPHAGE_DN                     | 146 | 0.60739 | 2.144879 | 2.05E-09 | 3.99E-08 | 2.32E-08 | 2103 |
| GSE35825_IFNA_VS_IFNG_STIM_MACROPHAGE_UP                                              | 136 | 0.61651 | 2.157319 | 2.05E-09 | 3.99E-08 | 2.32E-08 | 1837 |
| HALLMARK_IL2_STAT5_SIGNALING                                                          | 174 | 0.57348 | 2.072377 | 2.07E-09 | 4.01E-08 | 2.34E-08 | 2763 |
| GSE6259_FLT3L_INDUCED_33D1_POS_DC_VS_CD4_TCEL<br>L_UP                                 | 149 | 0.60369 | 2.133961 | 2.15E-09 | 4.15E-08 | 2.41E-08 | 1876 |
| GSE21063_WT_VS_NFATC1_KO_3H_ANTI_IGM_STIM_BC<br>ELL_DN                                | 160 | 0.59332 | 2.119235 | 2.31E-09 | 4.44E-08 | 2.58E-08 | 1501 |
| GSE22886_NAIVE_CD4_TCELL_VS_NEUTROPHIL_DN                                             | 161 | 0.59718 | 2.130402 | 2.44E-09 | 4.67E-08 | 2.72E-08 | 1554 |
| GSE36891_POLYIC_TLR3_VS_PAM_TLR2_STIM_PERITON<br>EAL_MACROPHAGE_UP                    | 120 | 0.63084 | 2.181243 | 2.45E-09 | 4.68E-08 | 2.73E-08 | 1958 |
| GSE29618_BCELL_VS_MONOCYTE_DAY7_FLU_VACCINE<br>_DN                                    | 173 | 0.57406 | 2.075016 | 2.58E-09 | 4.89E-08 | 2.85E-08 | 1893 |

|                                                                      |     |         |          |          |          |          |      |
|----------------------------------------------------------------------|-----|---------|----------|----------|----------|----------|------|
| GSE9650_NAIVE_VS_MEMORY_CD8_TCELL_DN                                 | 163 | 0.58574 | 2.08887  | 2.65E-09 | 5.02E-08 | 2.92E-08 | 1534 |
| GSE3039_NKT_CELL_VS_ALPHAALPHA_CD8_TCELL_DN                          | 154 | 0.59646 | 2.123481 | 2.81E-09 | 5.31E-08 | 3.09E-08 | 1675 |
| GSE9988_LOW_LPS_VS_ANTI_TREM1_AND_LPS_MONOCYTE_UP                    | 161 | 0.59618 | 2.12683  | 2.84E-09 | 5.34E-08 | 3.11E-08 | 2287 |
| GSE38681_WT_VS_LYL1_KO_LYMPHOID_PRIMED_MULTIPOTENT_PROGENITOR_DN     | 163 | 0.58438 | 2.084008 | 3.18E-09 | 5.95E-08 | 3.46E-08 | 2347 |
| GSE11057_NAIVE_VS_EFF_MEMORY_CD4_TCELL_DN                            | 161 | 0.5949  | 2.122296 | 3.33E-09 | 6.18E-08 | 3.60E-08 | 1676 |
| GSE26495_NAIVE_VS_PD1HIGH_CD8_TCELL_DN                               | 156 | 0.59598 | 2.121262 | 3.33E-09 | 6.18E-08 | 3.60E-08 | 2363 |
| GSE43863_DAY6_EFF_VS_DAY150_MEM_LY6C_INT_CXR5POS_CD4_TCELL_DN        | 164 | 0.59333 | 2.12124  | 3.45E-09 | 6.38E-08 | 3.71E-08 | 1671 |
| GSE3920_IFNA_VS_IFNG_TREATED_FIBROBLAST_UP                           | 140 | 0.60708 | 2.131413 | 3.59E-09 | 6.63E-08 | 3.86E-08 | 1557 |
| GSE42021_CD24HI_VS_CD24LOW_TREG_THYMUS_DN                            | 166 | 0.5883  | 2.111344 | 4.05E-09 | 7.44E-08 | 4.33E-08 | 2430 |
| GSE3565_CTRL_VS_LPS_INJECTED_SPLENOCYTES_UP                          | 144 | 0.60467 | 2.129666 | 4.07E-09 | 7.45E-08 | 4.34E-08 | 2103 |
| GSE9509_LPS_VS_LPS_AND_IL10_STIM_IL10_KO_MACROPHAGE_10MIN_UP         | 164 | 0.59093 | 2.112651 | 4.50E-09 | 8.20E-08 | 4.77E-08 | 1582 |
| GSE17721_0.5H_VS_24H_CPG_BMDC_DN                                     | 155 | 0.59639 | 2.12189  | 4.56E-09 | 8.28E-08 | 4.82E-08 | 1501 |
| GSE5589_LPS_VS_LPS_AND_IL10_STIM_IL10_KO_MACROPHAGE_45MIN_DN         | 167 | 0.57835 | 2.080055 | 4.59E-09 | 8.28E-08 | 4.82E-08 | 1606 |
| GSE7768_OVA_ALONE_VS_OVA_WITH_LPS_IMMUNIZED_MOUSE_WHOLE_SPLEEN_6H_DN | 139 | 0.60652 | 2.126488 | 4.59E-09 | 8.28E-08 | 4.82E-08 | 2423 |
| GSE29617_CTRL_VS_TIV_FLU_VACCINE_PBMC_2008_UP                        | 140 | 0.60466 | 2.122901 | 4.83E-09 | 8.68E-08 | 5.05E-08 | 3021 |
| GSE19401_NAIVE_VS_IMMUNIZED_MOUSE_PLN_FOLLICULAR_DC_UP               | 162 | 0.58144 | 2.073286 | 5.25E-09 | 9.39E-08 | 5.47E-08 | 1249 |
| GSE30083_SP3_VS_SP4_THYMOCYTE_DN                                     | 166 | 0.58451 | 2.097767 | 6.38E-09 | 1.13E-07 | 6.60E-08 | 1774 |
| GSE33424_CD161_INT_VS_NEG_CD8_TCELL_UP                               | 162 | 0.57929 | 2.065602 | 6.38E-09 | 1.13E-07 | 6.60E-08 | 1383 |
| GSE9960_HEALTHY_VS_GRAM_POS_SEPSIS_PBMC_DN                           | 144 | 0.60135 | 2.11795  | 6.54E-09 | 1.16E-07 | 6.74E-08 | 1534 |
| GSE2706_2H_VS_8H_LPS_STIM_DC_DN                                      | 145 | 0.59408 | 2.092527 | 6.72E-09 | 1.18E-07 | 6.88E-08 | 2536 |
| GSE2706_2H_VS_8H_R848_AND_LPS_STIM_DC_DN                             | 150 | 0.59656 | 2.108748 | 6.72E-09 | 1.18E-07 | 6.88E-08 | 1924 |
| GSE7852_TREG_VS_TCONV_LN_UP                                          | 149 | 0.59362 | 2.098376 | 6.95E-09 | 1.22E-07 | 7.09E-08 | 1417 |
| GSE7509_DC_VS_MONOCYTE_DN                                            | 148 | 0.58995 | 2.076175 | 7.10E-09 | 1.24E-07 | 7.21E-08 | 1927 |
| GSE18791_UNSTIM_VS_NEWCASTLE_VIRUS_DC_18H_D                          | 138 | 0.59998 | 2.100023 | 7.12E-09 | 1.24E-07 | 7.21E-08 | 1439 |
| GSE36888_UNTREATED_VS_IL2_TREATED_STAT5_AB_KNOCKIN_TCELL_17H_UP      | 140 | 0.59994 | 2.106359 | 7.56E-09 | 1.31E-07 | 7.62E-08 | 1948 |
| GSE18791_CTRL_VS_NEWCASTLE_VIRUS_DC_16H_DN                           | 151 | 0.59398 | 2.104154 | 8.06E-09 | 1.39E-07 | 8.10E-08 | 1924 |

|                                                                                     |     |         |          |          |          |          |      |
|-------------------------------------------------------------------------------------|-----|---------|----------|----------|----------|----------|------|
| GSE3920_UNTREATED_VS_IFNA_TREATED_ENDOTHELIAL_CELL_UP                               | 158 | 0.59072 | 2.102225 | 8.22E-09 | 1.41E-07 | 8.22E-08 | 2068 |
| GSE37534_UNTREATED_VS_ROSIGLITAZONE_TREATED_CD4_TCELL_PPARG1_AND_FOXP3_TRASDUCED_DN | 159 | 0.58436 | 2.081498 | 8.23E-09 | 1.41E-07 | 8.22E-08 | 2190 |
| GSE2706_R848_VS_LPS_2H_STIM_DC_DN                                                   | 133 | 0.60935 | 2.133891 | 9.75E-09 | 1.67E-07 | 9.70E-08 | 1389 |
| GSE21546_WT_VS_SAP1A_KO_DP_THYMOCYTES_UP                                            | 153 | 0.58975 | 2.092703 | 1.00E-08 | 1.71E-07 | 9.93E-08 | 2192 |
| GSE13484_UNSTIM_VS_3H_YF17D_VACCINE_STIM_PBM_C_DN                                   | 160 | 0.58183 | 2.078184 | 1.06E-08 | 1.80E-07 | 1.05E-07 | 1550 |
| GSE17301_CTRL_VS_48H_ACD3_ACD28_STIM_CD8_TCELL_DN                                   | 165 | 0.57481 | 2.058851 | 1.11E-08 | 1.88E-07 | 1.10E-07 | 1845 |
| GSE14415_INDUCED_TREG_VS_FOXP3_KO_INDUCED_TREG_DN                                   | 155 | 0.588   | 2.09204  | 1.13E-08 | 1.90E-07 | 1.11E-07 | 2103 |
| GSE22886_NAIVE_CD8_TCELL_VS_DC_DN                                                   | 170 | 0.571   | 2.052497 | 1.14E-08 | 1.91E-07 | 1.11E-07 | 1868 |
| GSE22589_HEALTHY_VS_HIV_INFECTED_DC_DN                                              | 162 | 0.57418 | 2.047407 | 1.17E-08 | 1.96E-07 | 1.14E-07 | 2229 |
| GSE45365_HEALTHY_VS_MCMV_INFECTION_CD8A_DC_DN                                       | 167 | 0.57086 | 2.053131 | 1.18E-08 | 1.97E-07 | 1.14E-07 | 2319 |
| GSE9988_ANTI_TREM1_VS_CTRL_TREATED_MONOCYTES_UP                                     | 156 | 0.58783 | 2.092243 | 1.18E-08 | 1.97E-07 | 1.14E-07 | 2545 |
| GSE41867_NAIVE_VS_DAY30_LCMV_CLONE13_EXHAUSTED_CD8_TCELL_UP                         | 149 | 0.58941 | 2.083496 | 1.20E-08 | 1.99E-07 | 1.16E-07 | 2226 |
| GSE7460_TCONV_VS_TREG_LN_DN                                                         | 160 | 0.58002 | 2.071724 | 1.31E-08 | 2.16E-07 | 1.26E-07 | 1417 |
| GSE30971_WBP7_HET_VS_KO_MACROPHAGE_2H_LPS_STIM_UP                                   | 160 | 0.57991 | 2.071343 | 1.32E-08 | 2.18E-07 | 1.27E-07 | 1445 |
| GSE13522_WT_VS_IFNAR_KO_SKING_T_CRUZI_Y_STRAIN_INF_UP                               | 163 | 0.57392 | 2.046707 | 1.33E-08 | 2.19E-07 | 1.27E-07 | 1967 |
| GSE6259_FLT3L_INDUCED_DEC205_POS_DC_VS_CD8_TCELL_DN                                 | 144 | 0.59554 | 2.097498 | 1.46E-08 | 2.39E-07 | 1.39E-07 | 1997 |
| KAECH_NAIVE_VS_MEMORY_CD8_TCELL_DN                                                  | 165 | 0.5729  | 2.052006 | 1.55E-08 | 2.53E-07 | 1.47E-07 | 1534 |
| GSE22886_DAY0_VS_DAY7_MONOCYTE_IN_CULTURE_UP                                        | 160 | 0.57809 | 2.064856 | 1.65E-08 | 2.67E-07 | 1.56E-07 | 2226 |
| GSE360_T_GONDII_VS_M_TUBERCULOSIS_MAC_DN                                            | 155 | 0.58502 | 2.081421 | 1.68E-08 | 2.72E-07 | 1.58E-07 | 1399 |
| GSE24142_EARLY_THYMIC_PROGENITOR_VS_DN2_THYMOCYTE_FETAL_UP                          | 168 | 0.57381 | 2.064908 | 1.72E-08 | 2.78E-07 | 1.62E-07 | 2334 |
| GSE30971_CTRL_VS_LPS_STIM_MACROPHAGE_WBP7_KO_4H_DN                                  | 151 | 0.58775 | 2.082095 | 1.74E-08 | 2.79E-07 | 1.63E-07 | 2419 |

|                                                                               |     |         |          |          |          |          |      |
|-------------------------------------------------------------------------------|-----|---------|----------|----------|----------|----------|------|
| GSE24142_EARLY_THYMIC_PROGENITOR_VS_DN2_THY<br>MOCYTE_ADULT_UP                | 164 | 0.58152 | 2.079008 | 1.75E-08 | 2.80E-07 | 1.63E-07 | 1621 |
| GSE32034_LY6C_HIGH_VS_LOW_ROSIGLIZATONE_TREA<br>TED_MONOCYTE_DN               | 158 | 0.58504 | 2.082041 | 1.75E-08 | 2.80E-07 | 1.63E-07 | 2063 |
| GSE1460_INTRATHYMIC_T_PROGENITOR_VS_THYMIC_<br>STROMAL_CELL_DN                | 171 | 0.56056 | 2.021963 | 1.78E-08 | 2.84E-07 | 1.65E-07 | 2218 |
| GSE46606_IRF4MID_VS_WT_CD40L_IL2_IL5_DAY1_STIM<br>ULATED_BCELL_DN             | 162 | 0.56947 | 2.030617 | 1.86E-08 | 2.95E-07 | 1.72E-07 | 2341 |
| GSE18893_TCONV_VS_TREG_24H_TNF_STIM_UP                                        | 167 | -0.4679 | -2.01038 | 1.88E-08 | 2.97E-07 | 1.73E-07 | 3623 |
| GSE21360_PRIMARY_VS_QUATERNARY_MEMORY_CD8_<br>TCELL_UP                        | 153 | 0.58512 | 2.076271 | 1.91E-08 | 3.02E-07 | 1.76E-07 | 1601 |
| GSE11057_NAIVE_VS_MEMORY_CD4_TCELL_DN                                         | 160 | 0.57651 | 2.059202 | 1.94E-08 | 3.05E-07 | 1.78E-07 | 1487 |
| GSE26290_CTRL_VS_AKT_INHIBITOR_TREATED_ANTI_<br>CD3_AND_IL2_STIM_CD8_TCELL_DN | 160 | 0.57624 | 2.05823  | 2.01E-08 | 3.14E-07 | 1.83E-07 | 2402 |
| GSE23568_ID3_KO_VS_WT_CD8_TCELL_DN                                            | 164 | 0.58035 | 2.074823 | 2.05E-08 | 3.20E-07 | 1.86E-07 | 2148 |
| GSE30971_CTRL_VS_LPS_STIM_MACROPHAGE_WBP7_H<br>ET_2H_UP                       | 151 | 0.58598 | 2.075825 | 2.17E-08 | 3.37E-07 | 1.96E-07 | 1808 |
| GSE2405_0H_VS_3H_A_PHAGOCYTOPHILUM_STIM_NEU<br>TROPIL_UP                      | 158 | 0.58332 | 2.075919 | 2.24E-08 | 3.48E-07 | 2.03E-07 | 1868 |
| GSE43863_TFH_VS_LY6C_LOW_CXCR5NEG_EFFECTOR_<br>CD4_TCELL_UP                   | 162 | 0.56776 | 2.024504 | 2.32E-08 | 3.58E-07 | 2.09E-07 | 2706 |
| GSE2706_R848_VS_R848_AND_LPS_8H_STIM_DC_UP                                    | 138 | 0.58866 | 2.060417 | 2.78E-08 | 4.28E-07 | 2.49E-07 | 2205 |
| GSE9960_GRAM_NEG_VS_GRAM_POS_SEPSIS_PBMC_UP                                   | 140 | 0.58841 | 2.065871 | 3.09E-08 | 4.75E-07 | 2.76E-07 | 2272 |
| GSE24634_IL4_VS_CTRL_TREATED_NAIVE_CD4_TCELL_<br>DAY5_DN                      | 153 | 0.5814  | 2.063056 | 3.13E-08 | 4.79E-07 | 2.79E-07 | 1504 |
| GSE13411_PLASMA_CELL_VS_MEMORY_BCELL_DN                                       | 152 | 0.58129 | 2.059909 | 3.21E-08 | 4.91E-07 | 2.86E-07 | 2409 |
| GSE360_L_DONOVANI_VS_B_MALAYI_HIGH_DOSE_DC_<br>UP                             | 163 | 0.56539 | 2.016303 | 3.31E-08 | 5.04E-07 | 2.93E-07 | 2187 |
| GSE21670_STAT3_KO_VS_WT_CD4_TCELL_DN                                          | 157 | 0.58013 | 2.066224 | 3.32E-08 | 5.04E-07 | 2.93E-07 | 2073 |
| GSE43955_TH0_VS_TGFB_IL6_TH17_ACT_CD4_TCELL_4<br>H_UP                         | 159 | 0.57366 | 2.043402 | 3.33E-08 | 5.04E-07 | 2.93E-07 | 1653 |
| GSE17974_IL4_AND_ANTI_IL12_VS_UNTREATED_6H_AC<br>T_CD4_TCELL_DN               | 153 | 0.58009 | 2.058406 | 3.58E-08 | 5.41E-07 | 3.15E-07 | 1293 |
| GSE3039_NKT_CELL_VS_ALPHAALPHA_CD8_TCELL_UP                                   | 157 | 0.57952 | 2.06406  | 3.72E-08 | 5.58E-07 | 3.25E-07 | 2064 |

|                                                                                 |     |         |          |          |          |          |      |
|---------------------------------------------------------------------------------|-----|---------|----------|----------|----------|----------|------|
| GSE27241_CTRL_VS_DIGOXIN_TREATED_CD4_TCELL_I<br>N_TH17_POLARIZING_CONDITIONS_DN | 156 | 0.57733 | 2.054895 | 3.72E-08 | 5.58E-07 | 3.25E-07 | 2067 |
| GSE2128_CTRL_VS_MIMETOPE_NEGATIVE_SELECTION_<br>DP_THYMOCYTE_NOD_UP             | 165 | 0.56623 | 2.028093 | 3.77E-08 | 5.63E-07 | 3.28E-07 | 1648 |
| GSE360_DC_VS_MAC_M_TUBERCULOSIS_DN                                              | 153 | 0.57951 | 2.056368 | 3.78E-08 | 5.63E-07 | 3.28E-07 | 1238 |
| GSE21774_CD62L_POS_CD56_BRIGHT_VS_CD62L_NEG_C<br>D56_DIM_NK_CELL_UP             | 156 | 0.57726 | 2.054641 | 3.79E-08 | 5.63E-07 | 3.28E-07 | 1386 |
| GSE14699_DELETIONAL_TOLERANCE_VS_ACTIVATED_<br>CD8_TCELL_UP                     | 154 | 0.57481 | 2.046423 | 3.81E-08 | 5.65E-07 | 3.29E-07 | 1150 |
| GSE2405_S_AUREUS_VS_A_PHAGOCYTOPHILUM_NEUT<br>ROPHIL_UP                         | 160 | 0.57075 | 2.03861  | 4.10E-08 | 6.04E-07 | 3.51E-07 | 1945 |
| GSE39382_IL3_VS_IL3_IL33_TREATED_MAST_CELL_DN                                   | 160 | 0.57077 | 2.038706 | 4.10E-08 | 6.04E-07 | 3.51E-07 | 2418 |
| GSE23925_LIGHT_ZONE_VS_NAIVE_BCELL_UP                                           | 170 | 0.56075 | 2.015655 | 4.46E-08 | 6.55E-07 | 3.81E-07 | 1971 |
| GSE32034_LY6C_HIGH_VS_LOW_MONOCYTE_UP                                           | 163 | 0.56093 | 2.000404 | 4.59E-08 | 6.73E-07 | 3.92E-07 | 2216 |
| GSE22886_NAIVE_BCELL_VS_BM_PLASMA_CELL_DN                                       | 163 | 0.56034 | 1.998279 | 4.66E-08 | 6.81E-07 | 3.96E-07 | 2462 |
| GSE39820_CTRL_VS_IL1B_IL6_CD4_TCELL_DN                                          | 159 | 0.56991 | 2.030021 | 4.71E-08 | 6.86E-07 | 3.99E-07 | 2234 |
| GSE7460_TCONV_VS_TREG_THYMUS_DN                                                 | 167 | 0.55954 | 2.012413 | 4.90E-08 | 7.11E-07 | 4.14E-07 | 1721 |
| GSE22025_PROGESTERONE_VS_TGFB1_AND_PROGESTE<br>RONE_TREATED_CD4_TCELL_DN        | 167 | 0.55902 | 2.010541 | 5.03E-08 | 7.28E-07 | 4.24E-07 | 1561 |
| GSE7219_WT_VS_NIK_NFKB2_KO_DC_UP                                                | 156 | 0.57418 | 2.043676 | 5.37E-08 | 7.75E-07 | 4.51E-07 | 2333 |
| GSE4590_SMALL_VS_LARGE_PRE_BCELL_UP                                             | 153 | 0.57572 | 2.0429   | 5.56E-08 | 8.00E-07 | 4.66E-07 | 2104 |
| GSE360_DC_VS_MAC_T_GONDII_UP                                                    | 155 | 0.57431 | 2.043326 | 6.45E-08 | 9.26E-07 | 5.39E-07 | 2107 |
| GSE22935_WT_VS_MYD88_KO_MACROPHAGE_12H_MB<br>OVIS_BCG_STIM_DN                   | 170 | 0.55731 | 2.003281 | 6.86E-08 | 9.82E-07 | 5.72E-07 | 2229 |
| GSE2405_HEAT_KILLED_LYSATE_VS_LIVE_A_PHAGOC<br>YTOPHILUM_STIM_NEUTROPHIL_24H_UP | 172 | 0.54838 | 1.979238 | 6.92E-08 | 9.88E-07 | 5.75E-07 | 2017 |
| GSE4748_CTRL_VS_LPS_AND_CYANOBACTERIUM_LPSL<br>IKE_STIM_DC_3H_UP                | 167 | 0.55683 | 2.002654 | 6.98E-08 | 9.92E-07 | 5.78E-07 | 1548 |
| GSE46606_UNSTIM_VS_CD40L_IL2_IL5_3DAY_STIMULA<br>TED_IRF4MID_SORTED_BCELL_DN    | 169 | 0.55987 | 2.012753 | 7.00E-08 | 9.93E-07 | 5.78E-07 | 2548 |
| GSE11057_NAIVE_VS_CENT_MEMORY_CD4_TCELL_DN                                      | 162 | 0.56094 | 2.000199 | 7.23E-08 | 1.02E-06 | 5.96E-07 | 1689 |
| GSE14415_INDUCED_TREG_VS_FAILED_INDUCED_TREG<br>_DN                             | 147 | 0.58463 | 2.062208 | 7.46E-08 | 1.05E-06 | 6.12E-07 | 1675 |
| GSE41176_UNSTIM_VS_ANTI_IGM_STIM_TAK1_KO_BCE<br>LL_24H_DN                       | 158 | 0.57392 | 2.042434 | 7.47E-08 | 1.05E-06 | 6.12E-07 | 1683 |

|                                                                                     |     |         |          |          |          |          |      |
|-------------------------------------------------------------------------------------|-----|---------|----------|----------|----------|----------|------|
| GSE7548_DAY7_VS_DAY28_PCC_IMMUNIZATION_CD4_T<br>CELL_DN                             | 163 | 0.55635 | 1.984058 | 7.51E-08 | 1.05E-06 | 6.13E-07 | 795  |
| GSE36392_TYPE_2_MYELOID_VS_EOSINOPHIL_IL25_TRE<br>ATED_LUNG_DN                      | 153 | 0.57266 | 2.032047 | 8.00E-08 | 1.12E-06 | 6.51E-07 | 2422 |
| GSE14000_UNSTIM_VS_16H_LPS_DC_DN                                                    | 151 | 0.57302 | 2.029889 | 8.35E-08 | 1.16E-06 | 6.78E-07 | 2682 |
| GSE17721_POLYIC_VS_PAM3CSK4_1H_BMDC_DN                                              | 157 | 0.57269 | 2.039703 | 8.66E-08 | 1.20E-06 | 7.01E-07 | 2068 |
| GSE15930_STIM_VS_STIM_AND_IFNAB_48H_CD8_T_CEL<br>L_DN                               | 167 | 0.55442 | 1.993992 | 9.06E-08 | 1.26E-06 | 7.31E-07 | 1969 |
| GSE29618_PDC_VS_MDC_DAY7_FLU_VACCINE_UP                                             | 163 | 0.55461 | 1.977859 | 9.37E-08 | 1.30E-06 | 7.54E-07 | 2031 |
| GSE21379_WT_VS_SAP_KO_TFH_CD4_TCELL_UP                                              | 163 | 0.55444 | 1.977251 | 9.50E-08 | 1.31E-06 | 7.63E-07 | 1409 |
| GSE25123_WT_VS_PPARG_KO_MACROPHAGE_DN                                               | 152 | 0.57322 | 2.031304 | 9.91E-08 | 1.36E-06 | 7.93E-07 | 2122 |
| GSE3982_MEMORY_CD4_TCELL_VS_BCELL_DN                                                | 155 | 0.57022 | 2.028757 | 1.02E-07 | 1.40E-06 | 8.15E-07 | 1638 |
| GSE7852_TREG_VS_TCONV_THYMUS_UP                                                     | 169 | 0.55488 | 1.994813 | 1.04E-07 | 1.42E-06 | 8.28E-07 | 1802 |
| GSE3337_CTRL_VS_16H_IFNG_IN_CD8POS_DC_UP                                            | 160 | 0.56302 | 2.011004 | 1.11E-07 | 1.52E-06 | 8.83E-07 | 2476 |
| GSE32164_RESTING_DIFFERENTIATED_VS_ALTERNATI<br>VELY_ACT_M2_MACROPHAGE_DN           | 161 | 0.56567 | 2.01799  | 1.12E-07 | 1.52E-06 | 8.84E-07 | 2319 |
| GSE10325_BCELL_VS_LUPUS_BCELL_DN                                                    | 168 | 0.55777 | 2.007187 | 1.15E-07 | 1.56E-06 | 9.10E-07 | 2337 |
| GSE30971_CTRL_VS_LPS_STIM_MACROPHAGE_WBP7_K<br>O_4H_UP                              | 146 | 0.56996 | 2.012734 | 1.17E-07 | 1.59E-06 | 9.25E-07 | 1924 |
| GSE42021_TREG_PLN_VS_CD24LO_TREG_THYMUS_DN                                          | 157 | 0.57033 | 2.031323 | 1.22E-07 | 1.65E-06 | 9.60E-07 | 1513 |
| GSE3039_CD4_TCELL_VS_ALPHABETA_CD8_TCELL_UP                                         | 155 | 0.56859 | 2.022968 | 1.26E-07 | 1.69E-06 | 9.85E-07 | 1818 |
| GSE10325_CD4_TCELL_VS_LUPUS_CD4_TCELL_DN                                            | 155 | 0.56856 | 2.022852 | 1.27E-07 | 1.70E-06 | 9.92E-07 | 1586 |
| GSE8515_CTRL_VS_IL1_4H_STIM_MAC_DN                                                  | 162 | 0.55671 | 1.98511  | 1.29E-07 | 1.73E-06 | 1.01E-06 | 2162 |
| GSE23502_WT_VS_HDC_KO_MYELOID_DERIVED_SUPPR<br>ESSOR_CELL_BM_DN                     | 165 | 0.5554  | 1.989303 | 1.30E-07 | 1.73E-06 | 1.01E-06 | 2757 |
| GSE7852_LN_VS_FAT_TCONV_DN                                                          | 160 | 0.56086 | 2.003281 | 1.36E-07 | 1.81E-06 | 1.06E-06 | 1933 |
| GSE14000_4H_VS_16H_LPS_DC_TRANSLATED_RNA_UP                                         | 160 | 0.56004 | 2.000367 | 1.44E-07 | 1.91E-06 | 1.11E-06 | 1482 |
| GSE17721_PAM3CSK4_VS_GADIQUIMOD_1H_BMDC_UP                                          | 165 | 0.55362 | 1.982926 | 1.58E-07 | 2.09E-06 | 1.21E-06 | 1653 |
| GSE21546_SAP1A_KO_VS_SAP1A_KO_AND_ELK1_KO_A<br>NTI_CD3_STIM_DP_THYMOCYTES_DN        | 162 | 0.55511 | 1.979393 | 1.64E-07 | 2.16E-06 | 1.26E-06 | 1945 |
| GSE40274_CTRL_VS_XBP1_TRANSDUCEDED_ACTIVATED_<br>CD4_TCELL_UP                       | 134 | 0.58889 | 2.058355 | 1.65E-07 | 2.17E-06 | 1.26E-06 | 1530 |
| GSE5679_CTRL_VS_PPARG_LIGAND_ROSIGLITAZONE_A<br>ND_RARA_Agonist_AM580_TREATED_DC_UP | 155 | 0.56604 | 2.013885 | 1.65E-07 | 2.17E-06 | 1.26E-06 | 1402 |

|                                                                        |     |         |          |          |          |          |      |
|------------------------------------------------------------------------|-----|---------|----------|----------|----------|----------|------|
| GSE43863_DAY6_EFF_VS_DAY150_MEM_TH1_CD4_TCELL_UP                       | 174 | 0.53922 | 1.948583 | 1.68E-07 | 2.20E-06 | 1.28E-06 | 1675 |
| GSE32533_MIR17_KO_VS_MIR17_OVEREXPRESS_ACT_CD4_TCELL_UP                | 153 | 0.56553 | 2.006755 | 1.69E-07 | 2.20E-06 | 1.28E-06 | 1403 |
| GSE41176_UNSTIM_VS_ANTI_IGM_STIM_BCELL_1H_DN                           | 164 | 0.56126 | 2.006569 | 1.74E-07 | 2.26E-06 | 1.32E-06 | 1916 |
| GSE25085_FETAL_BM_VS_ADULT_BM_SP4_THYMIC_IMPLANT_DN                    | 159 | 0.56044 | 1.996305 | 1.74E-07 | 2.26E-06 | 1.32E-06 | 2096 |
| GSE29618_BCELL_VS_PDC_DAY7_FLU_VACCINE_UP                              | 154 | 0.56238 | 2.002157 | 1.75E-07 | 2.27E-06 | 1.32E-06 | 2548 |
| GSE43863_LY6C_INT_CXCR5POS_VS_LY6C_LOW_CXCR5_NEG_EFFECTOR_CD4_TCELL_DN | 167 | 0.54805 | 1.971103 | 1.77E-07 | 2.29E-06 | 1.33E-06 | 1986 |
| GSE22886_NAIVE_TCELL_VS_DC_DN                                          | 174 | 0.5387  | 1.946692 | 1.78E-07 | 2.30E-06 | 1.34E-06 | 2569 |
| GSE26890_CXCR1_NEG_VS_POS_EFFECTOR_CD8_TCELL_UP                        | 160 | 0.55899 | 1.996629 | 1.79E-07 | 2.30E-06 | 1.34E-06 | 1867 |
| GSE39110_UNTREATED_VS_IL2_TREATED_CD8_TCELL_DAY6_POST_IMMUNIZATION_UP  | 161 | 0.56063 | 2.00002  | 1.79E-07 | 2.30E-06 | 1.34E-06 | 1634 |
| GSE11057_CD4_CENT_MEM_VS_PBMC_DN                                       | 163 | 0.548   | 1.954286 | 1.80E-07 | 2.30E-06 | 1.34E-06 | 2519 |
| GSE33425_CD161_INT_VS_NEG_CD8_TCELL_DN                                 | 173 | 0.53831 | 1.945795 | 1.85E-07 | 2.36E-06 | 1.38E-06 | 1595 |
| GSE24634_IL4_VS_CTRL_TREATED_NAIVE_CD4_TCELL_DAY7_DN                   | 156 | 0.56368 | 2.00631  | 2.06E-07 | 2.62E-06 | 1.53E-06 | 1415 |
| GSE30971_WBP7_HET_VS_KO_MACROPHAGE_4H_LPS_STIM_UP                      | 151 | 0.56489 | 2.001103 | 2.11E-07 | 2.67E-06 | 1.56E-06 | 2352 |
| GSE30083_SP2_VS_SP4_THYMOCYTE_DN                                       | 164 | 0.56003 | 2.002173 | 2.14E-07 | 2.71E-06 | 1.58E-06 | 1893 |
| GSE2585_CTEC_VS_MTEC_THYMUS_DN                                         | 160 | 0.55786 | 1.992598 | 2.16E-07 | 2.72E-06 | 1.59E-06 | 1866 |
| GSE33424_CD161_HIGH_VS_NEG_CD8_TCELL_UP                                | 162 | 0.55247 | 1.969973 | 2.17E-07 | 2.74E-06 | 1.59E-06 | 2483 |
| GSE22886_NAIVE_VS_IGM_MEMORY_BCELL_DN                                  | 161 | 0.55908 | 1.99449  | 2.22E-07 | 2.79E-06 | 1.62E-06 | 1560 |
| GSE26030_TH1_VS_TH17_DAY5_POST_POLARIZATION_UP                         | 153 | 0.56264 | 1.996502 | 2.25E-07 | 2.81E-06 | 1.64E-06 | 1691 |
| GSE26488_CTRL_VS_PEPTIDE_INJECTION_OT2_THYMOCYTE_DN                    | 151 | 0.56388 | 1.997507 | 2.30E-07 | 2.87E-06 | 1.67E-06 | 2077 |
| GSE10325_LUPUS_CD4_TCELL_VS_LUPUS_MYELOID_UP                           | 155 | 0.56288 | 2.002635 | 2.40E-07 | 2.99E-06 | 1.74E-06 | 2098 |
| GSE17721_PAM3CSK4_VS_CPG_12H_BMDC_DN                                   | 159 | 0.55751 | 1.985861 | 2.46E-07 | 3.06E-06 | 1.78E-06 | 1579 |
| GSE9037_CTRL_VS_LPS_4H_STIM_IRAK4_KO_BMDM_D                            | 164 | 0.55869 | 1.997399 | 2.54E-07 | 3.15E-06 | 1.83E-06 | 1928 |
| GSE17721_0.5H_VS_4H_CPG_BMDC_DN                                        | 169 | 0.54742 | 1.967992 | 2.59E-07 | 3.20E-06 | 1.87E-06 | 2540 |
| GSE7219_UNSTIM_VS_LPS_AND_ANTI_CD40_STIM_NIK_NFKB2_KO_DC_DN            | 158 | 0.56312 | 2.004002 | 2.64E-07 | 3.26E-06 | 1.90E-06 | 1914 |

|                                                                                     |     |         |          |          |          |          |      |
|-------------------------------------------------------------------------------------|-----|---------|----------|----------|----------|----------|------|
| GSE36078_WT_VS_IL1R_KO_LUNG_DC_AFTER_AD5_INF_UP                                     | 162 | 0.54909 | 1.957946 | 3.08E-07 | 3.79E-06 | 2.21E-06 | 1646 |
| GSE25087_TREG_VS_TCONV_ADULT_UP                                                     | 149 | 0.56315 | 1.990667 | 3.12E-07 | 3.83E-06 | 2.23E-06 | 2181 |
| GSE7219_UNSTIM_VS_LPS_AND_ANTI_CD40_STIM_DC_DN                                      | 139 | 0.57386 | 2.011968 | 3.19E-07 | 3.91E-06 | 2.28E-06 | 2096 |
| GSE2770_TGFB_AND_IL4_VS_IL12_TREATED_ACT_CD4_TCELL_6H_UP                            | 154 | 0.5568  | 1.982293 | 3.25E-07 | 3.96E-06 | 2.31E-06 | 2672 |
| GSE43955_TH0_VS_TGFB_IL6_TH17_ACT_CD4_TCELL_30H_UP                                  | 169 | 0.54582 | 1.962256 | 3.25E-07 | 3.96E-06 | 2.31E-06 | 1559 |
| GSE39820_CTRL_VS_IL1B_IL6_IL23A_CD4_TCELL_DN                                        | 161 | 0.55493 | 1.979675 | 3.39E-07 | 4.12E-06 | 2.40E-06 | 2673 |
| GSE20727_ROS_INH_VS_ROS_INH_AND_DNFB_ALLERGEN_TREATED_DC_UP                         | 150 | 0.56339 | 1.991499 | 3.51E-07 | 4.25E-06 | 2.47E-06 | 2614 |
| GSE6259_33D1_POS_VS_DEC205_POS_FLT3L_INDUCED_SPLENIC_DC_UP                          | 148 | 0.55958 | 1.969291 | 3.64E-07 | 4.40E-06 | 2.56E-06 | 1542 |
| GSE2706_R848_VS_R848_AND_LPS_8H_STIM_DC_DN                                          | 146 | 0.56065 | 1.979848 | 3.77E-07 | 4.55E-06 | 2.65E-06 | 2485 |
| GSE41867_DAY6_VS_DAY15_LCMV_ARMSTRONG_EFFECTOR_CD8_TCELL_UP                         | 142 | 0.57061 | 2.004495 | 3.90E-07 | 4.70E-06 | 2.73E-06 | 1234 |
| GSE4748_CTRL_VS_CYANOBACTERIUM_LPSLIKE_STIM_DC_3H_DN                                | 172 | 0.53052 | 1.914776 | 3.95E-07 | 4.74E-06 | 2.76E-06 | 880  |
| GSE5589_IL6_KO_VS_IL10_KO_LPS_AND_IL10_STIM_MACROPHAGE_45MIN_UP                     | 162 | 0.54718 | 1.951105 | 3.99E-07 | 4.78E-06 | 2.78E-06 | 1943 |
| GSE46606_UNSTIM_VS_CD40L_IL2_IL5_1DAY_STIMULATED_IRF4_KO_BCELL_UP                   | 161 | 0.55294 | 1.972579 | 4.03E-07 | 4.82E-06 | 2.80E-06 | 1248 |
| GSE7219_UNSTIM_VS_LPS_AND_ANTI_CD40_STIM_NIK_NFKB2_KO_DC_UP                         | 149 | 0.56084 | 1.982497 | 4.15E-07 | 4.94E-06 | 2.88E-06 | 2113 |
| GSE37534_UNTREATED_VS_PIOGLITAZONE_TREATED_CD4_TCELL_PPARG1_AND_FOXP3_TRANSDUCED_DN | 162 | 0.54672 | 1.949468 | 4.37E-07 | 5.19E-06 | 3.02E-06 | 1917 |
| GSE21360_NAIVE_VS_PRIMARY_MEMORY_CD8_TCELL_UP                                       | 146 | 0.55908 | 1.974289 | 4.47E-07 | 5.31E-06 | 3.09E-06 | 1880 |
| GSE18791_CTRL_VS_NEWCASTLE_VIRUS_DC_4H_DN                                           | 151 | 0.55966 | 1.98256  | 4.61E-07 | 5.46E-06 | 3.18E-06 | 1559 |
| GSE16385_ROSIGLITAZONE_IL4_VS_IFNG_TNF_STIM_MACROPHAGE_UP                           | 164 | 0.55305 | 1.977205 | 4.73E-07 | 5.58E-06 | 3.25E-06 | 2241 |
| GSE17721_CTRL_VS_LPS_2H_BMDC_DN                                                     | 172 | 0.52857 | 1.90774  | 4.99E-07 | 5.88E-06 | 3.42E-06 | 1977 |
| GSE3982_DC_VS_CENT_MEMORY_CD4_TCELL_UP                                              | 173 | 0.52889 | 1.911744 | 5.29E-07 | 6.21E-06 | 3.62E-06 | 1403 |

|                                                                      |     |         |          |          |          |          |      |
|----------------------------------------------------------------------|-----|---------|----------|----------|----------|----------|------|
| GSE44955_MCSF_VS_MCSF_AND_IL27_STIM_MACROPHAGE_UP                    | 160 | 0.54994 | 1.964287 | 5.35E-07 | 6.27E-06 | 3.65E-06 | 1644 |
| HALLMARK_COAGULATION                                                 | 126 | 0.58583 | 2.031387 | 5.56E-07 | 6.50E-06 | 3.78E-06 | 1457 |
| GSE41867_DAY15_EFFECTOR_VS_DAY30_EXHAUSTED_CD8_TCELL_LCMV_CLONE13_UP | 160 | 0.54879 | 1.960176 | 5.72E-07 | 6.67E-06 | 3.88E-06 | 1919 |
| GSE2770_IL12_AND_TGFB_VS_IL4_TREATED_ACT_CD4_TCELL_48H_DN            | 135 | 0.57079 | 1.995253 | 5.80E-07 | 6.74E-06 | 3.93E-06 | 1801 |
| GSE360_L_MAJOR_VS_B_MALAYI_HIGH_DOSE_DC_UP                           | 165 | 0.54181 | 1.940626 | 6.48E-07 | 7.52E-06 | 4.38E-06 | 1982 |
| GSE22886_NAIVE_TCELL_VS_NEUTROPHIL_DN                                | 163 | 0.53715 | 1.915585 | 6.53E-07 | 7.56E-06 | 4.40E-06 | 2427 |
| GSE36891_UNSTIM_VS_POLYIC_TLR3_STIM_PERITONEAL_MACROPHAGE_UP         | 119 | 0.58188 | 2.008792 | 6.54E-07 | 7.56E-06 | 4.40E-06 | 2287 |
| GSE33292_WT_VS_TCF1_KO_DN3_THYMOCYTE_UP                              | 157 | 0.55804 | 1.987531 | 6.60E-07 | 7.61E-06 | 4.43E-06 | 1548 |
| GSE4535_BM_DERIVED_DC_VS_FOLLICULAR_DC_UP                            | 158 | 0.55408 | 1.971835 | 6.71E-07 | 7.72E-06 | 4.49E-06 | 2101 |
| GSE13306_RA_VS_UNTREATED_MEM_CD4_TCELL_UP                            | 160 | 0.546   | 1.950225 | 7.00E-07 | 8.04E-06 | 4.68E-06 | 1964 |
| GSE40274_FOXP3_VS_FOXP3_AND_PBX1_TRANSDUCEDED_ACTIVATED_CD4_TCELL_UP | 164 | 0.54861 | 1.961341 | 7.03E-07 | 8.05E-06 | 4.68E-06 | 1634 |
| GSE37416_0H_VS_6H_F_TULARENSIS_LVS_NEUTROPHIL_DN                     | 150 | 0.55746 | 1.970525 | 7.05E-07 | 8.05E-06 | 4.69E-06 | 2323 |
| GSE3982_DC_VS_BCELL_UP                                               | 171 | 0.5299  | 1.911383 | 7.22E-07 | 8.22E-06 | 4.79E-06 | 1475 |
| GSE360_CTRL_VS_L_MAJOR_DC_DN                                         | 162 | 0.54278 | 1.935431 | 7.27E-07 | 8.27E-06 | 4.81E-06 | 1534 |
| GSE43955_TGFB_IL6_VS_TGFB_IL6_IL23_TH17_ACT_CD4_TCELL_52H_DN         | 172 | 0.52381 | 1.890537 | 7.41E-07 | 8.40E-06 | 4.89E-06 | 1873 |
| GSE17721_LPS_VS_POLYIC_4H_BMDC_UP                                    | 161 | 0.5468  | 1.950687 | 7.46E-07 | 8.44E-06 | 4.91E-06 | 1691 |
| GSE36826_NORMAL_VS_STAPH_AUREUS_INF_SKIN_UP                          | 155 | 0.54974 | 1.955916 | 7.86E-07 | 8.87E-06 | 5.17E-06 | 1620 |
| GSE39556_UNTREATED_VS_3H_POLYIC_INJ_MOUSE_CD8A_DC_DN                 | 158 | 0.55265 | 1.96676  | 7.89E-07 | 8.89E-06 | 5.17E-06 | 2082 |
| GSE4590_LARGE_PRE_BCELL_VS_VPREB_POS_LARGE_PRE_BCELL_DN              | 155 | 0.54933 | 1.954435 | 7.97E-07 | 8.95E-06 | 5.21E-06 | 2262 |
| GSE45365_NK_CELL_VS_CD11B_DC_MCMV_INFECTION_DN                       | 158 | 0.55249 | 1.966203 | 8.00E-07 | 8.97E-06 | 5.22E-06 | 1693 |
| GSE5589_LPS_VS_LPS_AND_IL10_STIM_MACROPHAGE_180MIN_UP                | 157 | 0.55634 | 1.98149  | 8.10E-07 | 9.06E-06 | 5.27E-06 | 2208 |
| GSE3982_NEUTROPHIL_VS_CENT_MEMORY_CD4_TCELL_UP                       | 173 | 0.52376 | 1.893221 | 8.11E-07 | 9.06E-06 | 5.27E-06 | 2427 |

|                                                                                      |     |         |          |          |          |          |      |
|--------------------------------------------------------------------------------------|-----|---------|----------|----------|----------|----------|------|
| GSE9006_1MONTH_VS_4MONTH_POST_TYPE_1_DIABETES_DX_PBMC_UP                             | 152 | 0.55541 | 1.968203 | 8.80E-07 | 9.80E-06 | 5.71E-06 | 1416 |
| GSE36826_WT_VS_IL1R_KO_SKIN_UP                                                       | 166 | 0.54473 | 1.955003 | 8.87E-07 | 9.86E-06 | 5.74E-06 | 2092 |
| GSE21360_NAIVE_VS_SECONDARY_MEMORY_CD8_TCELL_LL_DN                                   | 148 | 0.55104 | 1.939246 | 9.40E-07 | 1.04E-05 | 6.07E-06 | 2240 |
| GSE12366_GC_VS_MEMORY_BCELL_DN                                                       | 146 | 0.5509  | 1.945399 | 9.43E-07 | 1.04E-05 | 6.07E-06 | 2633 |
| GSE42021_TREG_PLN_VS_CD24HI_TREG_THYMUS_UP                                           | 169 | 0.53536 | 1.924647 | 9.62E-07 | 1.06E-05 | 6.18E-06 | 2778 |
| KAECH_DAY15_EFF_VS_MEMORY_CD8_TCELL_UP                                               | 167 | 0.53285 | 1.916425 | 1.02E-06 | 1.12E-05 | 6.55E-06 | 1598 |
| GSE23321_CENTRAL_MEMORY_VS_NAIVE_CD8_TCELL_UP                                        | 166 | 0.54352 | 1.950631 | 1.05E-06 | 1.15E-05 | 6.69E-06 | 2206 |
| GSE36888_UNTREATED_VS_IL2_TREATED_STAT5_AB_KNOCKIN_TCELL_6H_UP                       | 150 | 0.5538  | 1.957573 | 1.07E-06 | 1.17E-05 | 6.80E-06 | 2119 |
| GSE360_T_GONDII_VS_B_MALAYI_LOW_DOSE_DC_UP                                           | 155 | 0.54711 | 1.946555 | 1.11E-06 | 1.21E-05 | 7.05E-06 | 2119 |
| GSE3982_BCELL_VS_CENTRAL_MEMORY_CD4_TCELL_UP                                         | 157 | 0.55134 | 1.963692 | 1.13E-06 | 1.24E-05 | 7.20E-06 | 1638 |
| GSE15330_HSC_VS_LYMPHOID_PRIMED_MULTIPOTENT_PROGENITOR_DN                            | 152 | 0.55306 | 1.959872 | 1.25E-06 | 1.36E-05 | 7.91E-06 | 2020 |
| GSE22886_NAIVE_CD4_TCELL_VS_DC_DN                                                    | 171 | 0.52418 | 1.890726 | 1.26E-06 | 1.37E-05 | 7.97E-06 | 2358 |
| GSE19923_WT_VS_HEB_AND_E2A_KO_DP_THYMOCYTE_DN                                        | 157 | 0.5496  | 1.957491 | 1.28E-06 | 1.39E-05 | 8.10E-06 | 2886 |
| GSE19888_ADENOSINE_A3R_INH_VS_INH_PRETREAT_AND_ACT_WITH_TCELL_MEMBRANES_MAST_CELL_UP | 153 | 0.54962 | 1.950294 | 1.31E-06 | 1.41E-05 | 8.22E-06 | 1976 |
| GSE43955_10H_VS_30H_ACT_CD4_TCELL_UP                                                 | 169 | 0.5326  | 1.914721 | 1.33E-06 | 1.44E-05 | 8.39E-06 | 1189 |
| GSE5542_UNTREATED_VS_IFNA_TREATED_EPITHELIAL_CELLS_6H_UP                             | 152 | 0.55283 | 1.959049 | 1.36E-06 | 1.46E-05 | 8.51E-06 | 1807 |
| GSE3400_UNTREATED_VS_IFNB_TREATED_MEF_DN                                             | 119 | 0.57376 | 1.980745 | 1.36E-06 | 1.46E-05 | 8.51E-06 | 1655 |
| GSE33292_DN3_THYMOCYTE_VS_TCF1_KO_TCELL_LYMPHOMA_UP                                  | 168 | 0.53538 | 1.92663  | 1.37E-06 | 1.47E-05 | 8.56E-06 | 1142 |
| GSE17721_POLYIC_VS_CPG_2H_BMDC_DN                                                    | 173 | 0.51841 | 1.873873 | 1.40E-06 | 1.50E-05 | 8.72E-06 | 1416 |
| GSE7852_THYMUS_VS_FAT_TCONV_DN                                                       | 162 | 0.5364  | 1.912699 | 1.42E-06 | 1.51E-05 | 8.82E-06 | 2594 |
| GSE22313_HEALTHY_VS_SLE_MOUSE_CD4_TCELL_DN                                           | 163 | 0.53164 | 1.895935 | 1.46E-06 | 1.56E-05 | 9.08E-06 | 1998 |
| GSE46606_UNSTIM_VS_CD40L_IL2_IL5_1DAY_STIMULATED_IRF4HIGH_SORTED_BCELL_DN            | 151 | 0.54831 | 1.942371 | 1.54E-06 | 1.63E-05 | 9.51E-06 | 2112 |
| GSE16385_ROSIGLITAZONE_IFNG_TNF_VS_IL4_STIM_MACROPHAGE_UP                            | 154 | 0.54091 | 1.925711 | 1.57E-06 | 1.67E-05 | 9.69E-06 | 2415 |

|                                                                     |     |         |          |          |          |          |      |
|---------------------------------------------------------------------|-----|---------|----------|----------|----------|----------|------|
| GSE2405_0H_VS_12H_A_PHAGOCYTOPHILUM_STIM_NEUTROPHIL_UP              | 159 | 0.53961 | 1.922104 | 1.67E-06 | 1.77E-05 | 1.03E-05 | 1530 |
| GSE43955_1H_VS_10H_ACT_CD4_TCELL_WITH_TGFB_IL6_DN                   | 163 | 0.5306  | 1.892247 | 1.68E-06 | 1.77E-05 | 1.03E-05 | 1648 |
| GSE18804_SPLEEN_MACROPHAGE_VS_BRAIN_TUMORAL_MACROPHAGE_UP           | 148 | 0.54454 | 1.916378 | 1.71E-06 | 1.81E-05 | 1.05E-05 | 1363 |
| GSE360_LOW_DOSE_B_MALAYI_VS_M_TUBERCULOSIS_MAC_DN                   | 166 | 0.53877 | 1.933595 | 1.72E-06 | 1.81E-05 | 1.05E-05 | 1283 |
| GSE22886_NAIVE_CD8_TCELL_VS_MONOCYTE_UP                             | 166 | 0.53842 | 1.932343 | 1.74E-06 | 1.82E-05 | 1.06E-05 | 2206 |
| GSE21546_UNSTIM_VS_ANTI_CD3_STIM_ELK1_KO_DP_THYMOCYTES_UP           | 135 | 0.56049 | 1.959234 | 1.74E-06 | 1.82E-05 | 1.06E-05 | 1505 |
| GSE17721_0.5H_VS_8H_CPG_BMDC_DN                                     | 151 | 0.54674 | 1.936798 | 1.80E-06 | 1.88E-05 | 1.09E-05 | 2287 |
| HALLMARK_UV_RESPONSE_DN                                             | 127 | 0.56846 | 1.972217 | 1.81E-06 | 1.89E-05 | 1.10E-05 | 1552 |
| GSE17721_PAM3CSK4_VS_CPG_4H_BMDC_DN                                 | 162 | 0.53413 | 1.904584 | 1.85E-06 | 1.93E-05 | 1.12E-05 | 2533 |
| GSE5542_UNTREATED_VS_IFNG_TREATED_EPITHELIAL_CELLS_6H_DN            | 153 | 0.54407 | 1.930613 | 1.89E-06 | 1.96E-05 | 1.14E-05 | 2471 |
| GSE34205_HEALTHY_VS_FLU_INF_INFANT_PBMC_DN                          | 159 | 0.53764 | 1.915089 | 1.89E-06 | 1.96E-05 | 1.14E-05 | 2547 |
| GSE24142_EARLY_THYMIC_PROGENITOR_VS_DN3_THYMOCYTE_ADULT_UP          | 160 | 0.53802 | 1.921707 | 1.90E-06 | 1.96E-05 | 1.14E-05 | 1621 |
| GSE41867_DAY6_EFFECTOR_VS_DAY30_EXHAUSTED_CD8_TCELL_LCMV_CLONE13_UP | 155 | 0.54248 | 1.930073 | 1.90E-06 | 1.96E-05 | 1.14E-05 | 1530 |
| GSE41176_WT_VS_TAK1_KO_ANTI_IGM_STIM_BCELL_3H_DN                    | 162 | 0.53347 | 1.902241 | 1.96E-06 | 2.02E-05 | 1.17E-05 | 1370 |
| GSE16385_ROSIGLITAZONE_IL4_VS_IL4_ALONE_STIM_MACROPHAGE_12H_UP      | 157 | 0.54498 | 1.941017 | 1.97E-06 | 2.03E-05 | 1.18E-05 | 1393 |
| GSE43955_TH0_VS_TGFB_IL6_TH17_ACT_CD4_TCELL_1H_UP                   | 166 | 0.53709 | 1.927584 | 2.10E-06 | 2.16E-05 | 1.26E-05 | 1291 |
| GSE13485_DAY1_VS_DAY3_YF17D_VACCINE_PBMC_DN                         | 160 | 0.53713 | 1.918554 | 2.12E-06 | 2.17E-05 | 1.26E-05 | 2351 |
| GSE45382_UNTREATED_VS_TGFB_TREATED_MACROPHAGES_UP                   | 163 | 0.52837 | 1.884294 | 2.20E-06 | 2.25E-05 | 1.31E-05 | 1591 |
| GSE1460_INTRATHYMIC_T_PROGENITOR_VS_DP_THYMOCYTE_DN                 | 154 | 0.53643 | 1.909756 | 2.25E-06 | 2.30E-05 | 1.34E-05 | 2274 |
| GSE14415_ACT_TCONV_VS_ACT_NATURAL_TREG_DN                           | 156 | 0.54164 | 1.927844 | 2.28E-06 | 2.32E-05 | 1.35E-05 | 1579 |
| GSE4984_UNTREATED_VS_GALECTIN1_TREATED_DC_UP                        | 151 | 0.5452  | 1.931334 | 2.30E-06 | 2.33E-05 | 1.36E-05 | 2236 |

|                                                                  |     |         |          |          |          |          |      |
|------------------------------------------------------------------|-----|---------|----------|----------|----------|----------|------|
| GSE7852_LN_VS_FAT_TREG_DN                                        | 159 | 0.53492 | 1.905378 | 2.41E-06 | 2.44E-05 | 1.42E-05 | 2422 |
| GSE11057_NAIVE_CD4_VS_PBMC_CD4_TCELL_DN                          | 166 | 0.53595 | 1.923459 | 2.43E-06 | 2.45E-05 | 1.43E-05 | 1892 |
| GSE21360_SECONDARY_VS_QUATERNARY_MEMORY_CD8_TCELL_DN             | 130 | 0.55564 | 1.939854 | 2.53E-06 | 2.55E-05 | 1.48E-05 | 1386 |
| GSE45365_NK_CELL_VS_CD8_TCELL_MCMV_INFECTIO<br>N_DN              | 152 | 0.54531 | 1.93242  | 2.60E-06 | 2.61E-05 | 1.52E-05 | 2021 |
| GSE36891_UNSTIM_VS_POLYIC_TLR3_STIM_PERITONEA<br>L_MACROPHAGE_DN | 170 | 0.52546 | 1.888772 | 2.68E-06 | 2.69E-05 | 1.57E-05 | 2208 |
| GSE11864_CSF1_PAM3CYS_VS_CSF1_IFNG_PAM3CYS_IN<br>_MAC_DN         | 146 | 0.53752 | 1.898161 | 2.84E-06 | 2.85E-05 | 1.66E-05 | 1764 |
| GSE360_L_DONOVANI_VS_B_MALAYI_LOW_DOSE_DC_<br>DN                 | 154 | 0.53387 | 1.90065  | 2.85E-06 | 2.86E-05 | 1.66E-05 | 1424 |
| GSE24026_PD1_LIGATION_VS_CTRL_IN_ACT_TCELL_LI<br>NE_UP           | 162 | 0.52925 | 1.887194 | 2.94E-06 | 2.93E-05 | 1.71E-05 | 1504 |
| GSE22886_CD8_TCELL_VS_BCELL_NAIVE_UP                             | 163 | 0.52523 | 1.873101 | 2.94E-06 | 2.93E-05 | 1.71E-05 | 2199 |
| GSE17721_LPS_VS_POLYIC_2H_BMDC_UP                                | 172 | 0.51088 | 1.843875 | 2.95E-06 | 2.93E-05 | 1.71E-05 | 2282 |
| GSE7548_DAY7_VS_DAY28_PCC_IMMUNIZATION_CD4_T<br>CELL_UP          | 157 | 0.54086 | 1.926355 | 2.97E-06 | 2.95E-05 | 1.71E-05 | 1889 |
| GSE42724_NAIVE_VS_MEMORY_BCELL_DN                                | 159 | 0.53356 | 1.900537 | 2.97E-06 | 2.95E-05 | 1.71E-05 | 1764 |
| GSE15735_2H_VS_12H_HDAC_INHIBITOR_TREATED_CD4<br>_TCELL_UP       | 156 | 0.53797 | 1.91477  | 3.06E-06 | 3.02E-05 | 1.76E-05 | 2339 |
| GSE19198_1H_VS_24H_IL21_TREATED_TCELL_DN                         | 159 | 0.53288 | 1.898119 | 3.06E-06 | 3.02E-05 | 1.76E-05 | 2850 |
| GSE24574_BCL6_HIGH_TFH_VS_TCONV_CD4_TCELL_DN                     | 162 | 0.52856 | 1.884727 | 3.11E-06 | 3.06E-05 | 1.78E-05 | 1927 |
| GSE360_L_DONOVANI_VS_L_MAJOR_MAC_DN                              | 156 | 0.53735 | 1.912576 | 3.28E-06 | 3.22E-05 | 1.87E-05 | 1100 |
| GSE19401_UNSTIM_VS_RETINOIC_ACID_STIM_FOLLICU<br>LAR_DC_DN       | 143 | 0.54979 | 1.935598 | 3.33E-06 | 3.26E-05 | 1.90E-05 | 1736 |
| GSE2770_IL12_AND_TGFB_ACT_VS_ACT_CD4_TCELL_6<br>H_DN             | 168 | 0.52595 | 1.892669 | 3.35E-06 | 3.28E-05 | 1.91E-05 | 2347 |
| GSE1460_CD4_THYMOCYTE_VS_THYMIC_STROMAL_CE<br>LL_DN              | 169 | 0.523   | 1.880197 | 3.41E-06 | 3.33E-05 | 1.94E-05 | 2117 |
| GSE360_L_DONOVANI_VS_B_MALAYI_LOW_DOSE_DC_<br>UP                 | 169 | 0.52279 | 1.879464 | 3.41E-06 | 3.33E-05 | 1.94E-05 | 2249 |
| GSE17721_LPS_VS_GARDIQUIMOD_2H_BMDC_UP                           | 167 | 0.5203  | 1.871301 | 3.53E-06 | 3.43E-05 | 2.00E-05 | 2763 |
| GSE22886_NAIVE_CD8_TCELL_VS_NKCELL_DN                            | 163 | 0.5233  | 1.866216 | 3.55E-06 | 3.45E-05 | 2.01E-05 | 2432 |
| GSE22886_NAIVE_CD4_TCELL_VS_MONOCYTE_UP                          | 157 | 0.53962 | 1.92192  | 3.58E-06 | 3.47E-05 | 2.02E-05 | 2061 |

|                                                                                     |     |         |          |          |          |          |      |
|-------------------------------------------------------------------------------------|-----|---------|----------|----------|----------|----------|------|
| GSE21670_UNTREATED_VS_TGFB_IL6_TREATED_CD4_T<br>CELL_UP                             | 152 | -0.4268 | -1.8101  | 3.66E-06 | 3.54E-05 | 2.06E-05 | 2988 |
| GSE15330_LYMPHOID_MULTIPOTENT_VS_PRO_BCELL_<br>DN                                   | 154 | 0.52874 | 1.8824   | 3.76E-06 | 3.63E-05 | 2.11E-05 | 1567 |
| GSE21774_CD62L_POS_CD56_DIM_VS_CD62L_NEG_CD56<br>_DIM_NK_CELL_UP                    | 160 | 0.52943 | 1.891025 | 3.82E-06 | 3.68E-05 | 2.14E-05 | 1229 |
| GSE25123_WT_VS_PPARG_KO_MACROPHAGE_IL4_STIM<br>_DN                                  | 171 | 0.51362 | 1.852658 | 3.94E-06 | 3.78E-05 | 2.20E-05 | 1472 |
| GSE13485_DAY7_VS_DAY21_YF17D_VACCINE_PBMC_UP                                        | 157 | 0.53725 | 1.913488 | 3.97E-06 | 3.79E-05 | 2.21E-05 | 1395 |
| GSE20366_TREG_VS_TCONV_DN                                                           | 169 | 0.52089 | 1.872624 | 3.97E-06 | 3.79E-05 | 2.21E-05 | 2385 |
| GSE9650_NAIVE_VS_EFF_CD8_TCELL_DN                                                   | 166 | 0.53046 | 1.903788 | 3.97E-06 | 3.79E-05 | 2.21E-05 | 2043 |
| GSE15735_CTRL_VS_HDAC_INHIBITOR_TREATED_CD4_<br>TCELL_2H_UP                         | 156 | 0.53541 | 1.905658 | 3.97E-06 | 3.79E-05 | 2.21E-05 | 2427 |
| GSE6269_E_COLI_VS_STREP_PNEUMO_INF_PBMC_DN                                          | 134 | 0.55505 | 1.940102 | 3.99E-06 | 3.79E-05 | 2.21E-05 | 1919 |
| GSE5679_CTRL_VS_PPARG_LIGAND_ROSIGLITAZONE_A<br>ND_RARA_AGONIST_AM580_TREATED_DC_DN | 168 | 0.52426 | 1.886588 | 3.99E-06 | 3.79E-05 | 2.21E-05 | 1310 |
| GSE17721_0.5H_VS_12H_CPG_BMDC_DN                                                    | 160 | 0.52886 | 1.888983 | 4.00E-06 | 3.79E-05 | 2.21E-05 | 2570 |
| GSE6259_CD4_TCELL_VS_CD8_TCELL_DN                                                   | 149 | 0.54162 | 1.914557 | 4.03E-06 | 3.81E-05 | 2.22E-05 | 1642 |
| GSE17974_2H_VS_72H_UNTREATED_IN_VITRO_CD4_TC<br>ELL_UP                              | 140 | 0.54366 | 1.908748 | 4.09E-06 | 3.85E-05 | 2.24E-05 | 2526 |
| GSE37301_CD4_TCELL_VS_GRANULOCYTE_MONOCYTE<br>_PROGENITOR_DN                        | 140 | 0.54373 | 1.909003 | 4.09E-06 | 3.85E-05 | 2.24E-05 | 2081 |
| GSE360_DC_VS_MAC_L_DONOVANI_UP                                                      | 158 | 0.53445 | 1.902003 | 4.14E-06 | 3.90E-05 | 2.27E-05 | 1975 |
| GSE40666_STAT1_KO_VS_STAT4_KO_CD8_TCELL_WITH<br>_IFNA_STIM_90MIN_DN                 | 116 | 0.56865 | 1.963951 | 4.15E-06 | 3.90E-05 | 2.27E-05 | 1881 |
| GSE29949_MICROGLIA_BRAIN_VS_CD8_POS_DC_SPLEE<br>N_UP                                | 172 | 0.50803 | 1.833586 | 4.18E-06 | 3.92E-05 | 2.28E-05 | 1692 |
| GSE24142_EARLY_THYMIC_PROGENITOR_VS_DN3_THY<br>MOCYTE_FETAL_UP                      | 165 | 0.52249 | 1.871447 | 4.35E-06 | 4.07E-05 | 2.37E-05 | 2569 |
| GSE45739_UNSTIM_VS_ACD3_ACD28_STIM_NRAS_KO_C<br>D4_TCELL_DN                         | 154 | 0.52704 | 1.876348 | 4.36E-06 | 4.07E-05 | 2.37E-05 | 2344 |
| GOLDRATH_NAIVE_VS_MEMORY_CD8_TCELL_DN                                               | 155 | 0.53424 | 1.900756 | 4.38E-06 | 4.09E-05 | 2.38E-05 | 1471 |
| GSE2128_C57BL6_VS_NOD_CD4CD8_DP_THYMOCYTE_U<br>P                                    | 158 | 0.53359 | 1.898908 | 4.40E-06 | 4.09E-05 | 2.38E-05 | 1887 |

|                                                                              |     |         |          |          |          |          |      |
|------------------------------------------------------------------------------|-----|---------|----------|----------|----------|----------|------|
| GSE17974_IL4_AND_ANTI_IL12_VS_UNTREATED_2H_AC<br>T_CD4_TCELL_UP              | 131 | 0.55146 | 1.922658 | 4.42E-06 | 4.10E-05 | 2.39E-05 | 1830 |
| GSE3920_IFNA_VS_IFNB_TREATED_ENDOTHELIAL_CEL<br>L_DN                         | 130 | 0.55041 | 1.921606 | 4.54E-06 | 4.21E-05 | 2.45E-05 | 1530 |
| GSE22886_CD4_TCELL_VS_BCELL_NAIVE_UP                                         | 165 | 0.52211 | 1.87009  | 4.56E-06 | 4.22E-05 | 2.46E-05 | 2458 |
| GSE6092_B_BURGDORFERI_VS_B_BURGDORFERI_AND_IF<br>NG_STIM_ENDOTHELIAL_CELL_DN | 151 | 0.5366  | 1.900875 | 4.62E-06 | 4.26E-05 | 2.48E-05 | 2010 |
| GSE9988_ANTI_TREM1_VS_VEHICLE_TREATED_MONOC<br>YTES_DN                       | 151 | 0.53641 | 1.900215 | 4.62E-06 | 4.26E-05 | 2.48E-05 | 2477 |
| GSE21670_IL6_VS_TGFB_AND_IL6_TREATED_CD4_TCEL<br>L_UP                        | 141 | 0.54649 | 1.922246 | 4.74E-06 | 4.36E-05 | 2.54E-05 | 2456 |
| GSE7460_FOXP3_MUT_VS_WT_ACT_TCONV_UP                                         | 162 | 0.52517 | 1.872625 | 4.77E-06 | 4.38E-05 | 2.55E-05 | 1997 |
| GSE3039_ALPHAALPHA_CD8_TCELL_VS_B2_BCELL_DN                                  | 167 | 0.51678 | 1.858633 | 4.86E-06 | 4.45E-05 | 2.59E-05 | 2721 |
| GSE28783_ANTI_MIR33_VS_UNTREATED_ATHEROSCLE<br>ROSIS_MACROPHAGE_DN           | 165 | 0.52095 | 1.865923 | 4.91E-06 | 4.49E-05 | 2.62E-05 | 1070 |
| GSE37301_MULTIPOTENT_PROGENITOR_VS_GRAN_MO<br>NO_PROGENITOR_DN               | 156 | 0.53309 | 1.897417 | 4.93E-06 | 4.50E-05 | 2.62E-05 | 2225 |
| GSE21678_WT_VS_FOXO1_FOXO3_KO_TREG_UP                                        | 148 | 0.53602 | 1.886376 | 4.96E-06 | 4.52E-05 | 2.63E-05 | 2495 |
| GSE37301_PRO_BCELL_VS_CD4_TCELL_DN                                           | 119 | 0.55568 | 1.91832  | 5.04E-06 | 4.59E-05 | 2.67E-05 | 1300 |
| GSE21670_UNTREATED_VS_TGFB_TREATED_STAT3_KO<br>_CD4_TCELL_DN                 | 155 | 0.53286 | 1.895857 | 5.08E-06 | 4.61E-05 | 2.69E-05 | 2368 |
| GSE22886_TCELL_VS_BCELL_NAIVE_UP                                             | 161 | 0.52942 | 1.888701 | 5.10E-06 | 4.62E-05 | 2.69E-05 | 1899 |
| GSE29618_BCELL_VS_MDC_UP                                                     | 145 | 0.53372 | 1.879923 | 5.10E-06 | 4.62E-05 | 2.69E-05 | 2933 |
| GSE2197_CPG_DNA_VS_UNTREATED_IN_DC_UP                                        | 162 | 0.52291 | 1.864575 | 5.47E-06 | 4.94E-05 | 2.87E-05 | 2723 |
| GSE3982_DC_VS_TH1_UP                                                         | 167 | 0.51432 | 1.849765 | 5.89E-06 | 5.31E-05 | 3.09E-05 | 1916 |
| GSE15330_HSC_VS_LYMPHOID_PRIMED_MULTIPOTENT<br>_PROGENITOR_UP                | 167 | 0.51415 | 1.849149 | 5.97E-06 | 5.38E-05 | 3.13E-05 | 2012 |
| GSE29618_BCELL_VS_PDC_DN                                                     | 165 | 0.51762 | 1.853986 | 6.13E-06 | 5.50E-05 | 3.20E-05 | 2235 |
| GSE14699_NAIVE_VS_DELETIONAL_TOLERANCE_CD8_T<br>CELL_DN                      | 158 | 0.52963 | 1.884832 | 6.14E-06 | 5.51E-05 | 3.20E-05 | 2060 |
| GSE5589_LPS_VS_LPS_AND_IL10_STIM_MACROPHAGE_<br>45MIN_UP                     | 156 | 0.52987 | 1.885946 | 6.15E-06 | 5.51E-05 | 3.20E-05 | 1933 |
| GSE5455_HEALTHY_VS_TUMOR_BEARING_MOUSE_SPL<br>EEN_MONOCYTE_24H_INCUBATION_DN | 162 | 0.52131 | 1.858892 | 6.17E-06 | 5.51E-05 | 3.21E-05 | 2266 |

|                                                                        |     |         |          |          |          |          |      |
|------------------------------------------------------------------------|-----|---------|----------|----------|----------|----------|------|
| GSE22886_DAY0_VS_DAY1_MONOCYTE_IN_CULTURE_UP                           | 165 | 0.51683 | 1.851171 | 6.48E-06 | 5.76E-05 | 3.35E-05 | 2548 |
| GSE3982_NEUTROPHIL_VS_BCELL_UP                                         | 165 | 0.51673 | 1.850794 | 6.48E-06 | 5.76E-05 | 3.35E-05 | 2576 |
| GSE13522_CTRL_VS_T_CRUZI_Y_STRAIN_INF_SKIN_IFNAR_KO_UP                 | 164 | 0.52484 | 1.876353 | 6.49E-06 | 5.76E-05 | 3.35E-05 | 1313 |
| GSE41867_NAIVE_VS_DAY6_LCMV_ARMSTRONG_EFFECTOR_CD8_TCELL_DN            | 164 | 0.52502 | 1.877002 | 6.49E-06 | 5.76E-05 | 3.35E-05 | 1633 |
| GSE34156_UNTREATED_VS_6H_NOD2_AND_TLR1_TLR2_LIGAND_TREATED_MONOCYTE_DN | 129 | 0.54732 | 1.906886 | 6.54E-06 | 5.79E-05 | 3.37E-05 | 1562 |
| GSE12392_WT_VS_IFNAR_KO_CD8A_NEG_SPLEEN_DC_UP                          | 155 | 0.53004 | 1.885824 | 6.82E-06 | 6.02E-05 | 3.51E-05 | 2059 |
| HALLMARK_ADIPOGENESIS                                                  | 166 | -0.4184 | -1.79774 | 6.89E-06 | 6.08E-05 | 3.54E-05 | 2391 |
| GSE34006_A2AR_KO_VS_A2AR_AGONIST_TREATED_TREG_UP                       | 161 | 0.52657 | 1.878534 | 6.93E-06 | 6.10E-05 | 3.55E-05 | 2699 |
| GSE17721_CTRL_VS_GARDIQUIMOD_12H_BMDC_DN                               | 169 | 0.51401 | 1.847884 | 7.12E-06 | 6.26E-05 | 3.64E-05 | 2406 |
| GSE19923_E2A_KO_VS_E2A_AND_HEB_KO_DP_THYMOCYTE_DN                      | 170 | 0.51415 | 1.848142 | 7.20E-06 | 6.31E-05 | 3.68E-05 | 1959 |
| GSE26669_CTRL_VS_COSTIM_BLOCK_MLR_CD4_TCELL_DN                         | 152 | 0.53753 | 1.904832 | 7.24E-06 | 6.34E-05 | 3.69E-05 | 2215 |
| GSE22886_NEUTROPHIL_VS_DC_UP                                           | 161 | 0.5257  | 1.875424 | 7.36E-06 | 6.43E-05 | 3.74E-05 | 1557 |
| GSE4984_LPS_VS_VEHICLE_CTRL_TREATED_DC_DN                              | 153 | 0.52882 | 1.876499 | 7.36E-06 | 6.43E-05 | 3.74E-05 | 2566 |
| GSE45365_HEALTHY_VS_MCMV_INFECTION_CD8A_DC_IFNAR_KO_DN                 | 166 | 0.52351 | 1.878826 | 7.46E-06 | 6.50E-05 | 3.78E-05 | 1764 |
| GSE360_DC_VS_MAC_T_GONDII_DN                                           | 164 | 0.52304 | 1.869929 | 7.54E-06 | 6.55E-05 | 3.82E-05 | 1749 |
| GSE43863_DAY6_EFF_VS_DAY150_MEM_TFH_CD4_TCELL_UP                       | 166 | 0.52333 | 1.878175 | 7.55E-06 | 6.55E-05 | 3.82E-05 | 1613 |
| GSE6092_IFNG_VS_IFNG_AND_B_BURGDORFERI_INF_ENDOTHELIAL_CELL_DN         | 147 | 0.5408  | 1.907583 | 7.58E-06 | 6.56E-05 | 3.82E-05 | 2803 |
| GSE4748_LPS_VS_LPS_AND_CYANOBACTERIUM_LPSLIKE_STIM_DC_3H_UP            | 140 | 0.53629 | 1.882884 | 7.68E-06 | 6.64E-05 | 3.87E-05 | 2300 |
| GSE29618_BCELL_VS_PDC_DAY7_FLU_VACCINE_DN                              | 165 | 0.51519 | 1.845282 | 7.69E-06 | 6.64E-05 | 3.87E-05 | 1926 |
| GSE1112_HY_CD8AB_VS_HY_CD8AA_THYMOCYTE_RT0C_CULTURE_DN                 | 142 | 0.53976 | 1.896126 | 7.70E-06 | 6.64E-05 | 3.87E-05 | 1740 |
| GSE39556_CD8A_DC_VS_NK_CELL_MOUSE_3H_POST_POLYIC_INJ_DN                | 162 | 0.51666 | 1.842294 | 7.83E-06 | 6.73E-05 | 3.92E-05 | 1609 |

|                                                                |     |         |          |          |          |          |      |
|----------------------------------------------------------------|-----|---------|----------|----------|----------|----------|------|
| GSE13738_TCR_VS_BYSTANDER_ACTIVATED_CD4_TCELL_DN               | 149 | 0.53412 | 1.888043 | 7.83E-06 | 6.73E-05 | 3.92E-05 | 1771 |
| GSE37605_TREG_VS_TCONV_NOD_FOXP3_FUSION_GFP_UP                 | 107 | 0.57221 | 1.951502 | 7.90E-06 | 6.77E-05 | 3.94E-05 | 1790 |
| GSE7852_TREG_VS_TCONV_FAT_UP                                   | 163 | 0.51442 | 1.83452  | 7.93E-06 | 6.79E-05 | 3.95E-05 | 1815 |
| GSE28737_WT_VS_BCL6_KO_FOLLICULAR_BCELL_DN                     | 159 | 0.52308 | 1.863221 | 8.07E-06 | 6.90E-05 | 4.02E-05 | 2349 |
| GSE3039_B2_VS_B1_BCELL_UP                                      | 161 | 0.52397 | 1.869245 | 8.15E-06 | 6.95E-05 | 4.05E-05 | 2222 |
| GSE36476_CTRL_VS_TSST_ACT_16H_MEMORY_CD4_TCELL_YOUNG_UP        | 164 | 0.52237 | 1.867536 | 8.24E-06 | 7.01E-05 | 4.08E-05 | 2108 |
| GSE24142_DN2_VS_DN3_THYMOCYTE_FETAL_UP                         | 175 | 0.50483 | 1.82816  | 8.27E-06 | 7.03E-05 | 4.09E-05 | 2031 |
| GSE17721_CTRL_VS_CPG_4H_BMDC_DN                                | 166 | 0.52217 | 1.874011 | 8.58E-06 | 7.29E-05 | 4.24E-05 | 1455 |
| GSE16385_ROSIGLITAZONE_IL4_VS_IL4_ALONE_STIM_MACROPHAGE_12H_DN | 162 | 0.5153  | 1.837456 | 8.70E-06 | 7.37E-05 | 4.29E-05 | 1954 |
| GSE2770_UNTREATED_VS_TGFB_AND_IL4_TREATED_ACT_CD4_TCELL_48H_DN | 165 | 0.51343 | 1.838978 | 8.82E-06 | 7.46E-05 | 4.34E-05 | 2084 |
| GSE360_L_DONOVANI_VS_B_MALAYI_HIGH_DOSE_DC_DN                  | 159 | 0.52228 | 1.860368 | 8.86E-06 | 7.48E-05 | 4.35E-05 | 1076 |
| GSE19198_CTRL_VS_IL21_TREATED_TCELL_6H_DN                      | 153 | 0.5253  | 1.864    | 9.20E-06 | 7.75E-05 | 4.51E-05 | 2087 |
| GSE40273_EOS_KO_VS_WT_TREG_UP                                  | 168 | 0.51486 | 1.852787 | 9.23E-06 | 7.76E-05 | 4.52E-05 | 2356 |
| GSE43863_TFH_VS_LY6C_LOW_CXCR5NEG_EFFECTOR_CD4_TCELL_DN        | 167 | 0.50918 | 1.831281 | 9.24E-06 | 7.76E-05 | 4.52E-05 | 1945 |
| GSE22501_PERIPHERAL_BLOOD_VS_CORD_BLOOD_TREG_DN                | 151 | 0.52891 | 1.873654 | 9.29E-06 | 7.79E-05 | 4.53E-05 | 1461 |
| GSE3337_CTRL_VS_4H_IFNG_IN_CD8POS_DC_DN                        | 155 | 0.52695 | 1.874825 | 9.34E-06 | 7.81E-05 | 4.55E-05 | 1644 |
| GSE33374_CD8_ALPHAALPHA_VS_ALPHABETA_CD161_HIGH_TCELL_DN       | 159 | 0.52177 | 1.858548 | 9.38E-06 | 7.84E-05 | 4.56E-05 | 2418 |
| GSE3982_BCELL_VS_BASOPHIL_DN                                   | 163 | 0.51242 | 1.827392 | 9.59E-06 | 8.00E-05 | 4.66E-05 | 2109 |
| GSE24671_CTRL_VS_SENDAI_VIRUS_INFECTED_MOUSE_SPLENOCYTES_UP    | 131 | 0.54253 | 1.891491 | 1.02E-05 | 8.52E-05 | 4.96E-05 | 1606 |
| GSE2585_CD80_HIGH_VS_LOW_AIRE_KO_MTEC_UP                       | 161 | 0.52133 | 1.859821 | 1.02E-05 | 8.52E-05 | 4.96E-05 | 1429 |
| GSE13484_UNSTIM_VS_12H_YF17D_VACCINE_STIM_PBMC_DN              | 158 | 0.52434 | 1.865989 | 1.04E-05 | 8.65E-05 | 5.04E-05 | 2223 |
| HALLMARK_ANGIOGENESIS                                          | 32  | 0.73902 | 2.059949 | 1.06E-05 | 8.78E-05 | 5.11E-05 | 1628 |
| GSE22886_NAIVE_BCELL_VS_BLOOD_PLASMA_CELL_DN                   | 163 | 0.5119  | 1.825545 | 1.07E-05 | 8.81E-05 | 5.13E-05 | 2462 |

|                                                                    |     |         |          |          |          |          |      |
|--------------------------------------------------------------------|-----|---------|----------|----------|----------|----------|------|
| GSE12392_IFNAR_KO_VS_IFNB_KO_CD8_NEG_SPLEEN_DC_DN                  | 166 | 0.5189  | 1.862273 | 1.07E-05 | 8.81E-05 | 5.13E-05 | 1573 |
| GSE16266_LPS_VS_HEATSHOCK_AND_LPS_STIM_MEF_DN                      | 150 | 0.5277  | 1.865339 | 1.10E-05 | 9.04E-05 | 5.26E-05 | 2442 |
| GSE17721_PAM3CSK4_VS_GADIQUIMOD_12H_BMDC_DN                        | 163 | 0.51114 | 1.822834 | 1.10E-05 | 9.05E-05 | 5.27E-05 | 2208 |
| GSE22886_NAIVE_CD8_TCELL_VS_MEMORY_TCELL_DN                        | 169 | 0.50839 | 1.827672 | 1.10E-05 | 9.05E-05 | 5.27E-05 | 1729 |
| GSE19923_E2A_KO_VS_HEB_AND_E2A_KO_DP_THYMOCYTE_UP                  | 166 | 0.51769 | 1.857934 | 1.12E-05 | 9.16E-05 | 5.33E-05 | 2636 |
| GSE40666_WT_VS_STAT1_KO_CD8_TCELL_DN                               | 154 | 0.51813 | 1.844622 | 1.12E-05 | 9.16E-05 | 5.33E-05 | 2888 |
| GSE360_L_MAJOR_VS_T_GONDII_MAC_UP                                  | 165 | 0.51108 | 1.830559 | 1.14E-05 | 9.36E-05 | 5.45E-05 | 1363 |
| GSE17580_UNINFECTED_VS_S_MANSONI_INF_TEFF_DN                       | 156 | 0.52379 | 1.864298 | 1.18E-05 | 9.66E-05 | 5.63E-05 | 1875 |
| GSE43957_UNTREATED_VS_NACL_TREATED_ANTI_CD3_CD28_STIM_CD4_TCELL_DN | 164 | 0.51698 | 1.848253 | 1.20E-05 | 9.78E-05 | 5.69E-05 | 2669 |
| GSE37301_MULTIPOTENT_PROGENITOR_VS_LYMPHOID_PRIMED_MPP_DN          | 148 | 0.52652 | 1.852976 | 1.21E-05 | 9.85E-05 | 5.74E-05 | 1971 |
| GSE13946_CTRL_VS_DSS_COLITIS_GD_TCELL_FROM_COLON_DN                | 145 | 0.52405 | 1.84586  | 1.24E-05 | 0.000101 | 5.86E-05 | 1804 |
| GSE17974_IL4_AND_ANTI_IL12_VS_UNTREATED_12H_ACT_CD4_TCELL_DN       | 143 | 0.53303 | 1.876572 | 1.27E-05 | 0.000103 | 6.01E-05 | 1677 |
| GSE43863_TFH_VS_LY6C_INT_CXCR5POS_EFFECTOR_CD4_TCELL_DN            | 162 | 0.51067 | 1.820939 | 1.31E-05 | 0.000106 | 6.17E-05 | 1947 |
| GSE29164_UNTREATED_VS_CD8_TCELL_TREATED_MELANOMA_DAY7_UP           | 161 | 0.51882 | 1.850882 | 1.32E-05 | 0.000107 | 6.22E-05 | 2202 |
| GSE9988_ANTI_TREM1_VS_VEHICLE_TREATED_MONOCYTES_UP                 | 142 | 0.53326 | 1.873295 | 1.42E-05 | 0.000115 | 6.68E-05 | 2060 |
| GSE42021_CD24INT_VS_CD24LOW_TREG_THYMUS_DN                         | 166 | 0.51471 | 1.847241 | 1.43E-05 | 0.000115 | 6.71E-05 | 1707 |
| GSE3982_NEUTROPHIL_VS_EFF_MEMORY_CD4_TCELL_UP                      | 165 | 0.50885 | 1.82257  | 1.44E-05 | 0.000116 | 6.75E-05 | 2543 |
| GSE29618_BCELL_VS_MDC_DAY7_FLU_VACCINE_UP                          | 154 | 0.51615 | 1.83756  | 1.47E-05 | 0.000118 | 6.85E-05 | 2405 |
| GSE1432_CTRL_VS_IFNG_1H_MICROGLIA_DN                               | 162 | 0.50946 | 1.816613 | 1.47E-05 | 0.000118 | 6.85E-05 | 1845 |
| GSE43955_TGFB_IL6_VS_TGFB_IL6_IL23_TH17_ACT_CD4_TCELL_60H_DN       | 168 | 0.5093  | 1.832756 | 1.49E-05 | 0.000119 | 6.95E-05 | 1886 |
| GSE22935_UNSTIM_VS_24H_MBOVIS_BCG_STIM_MACROPHAGE_DN               | 167 | 0.50336 | 1.810358 | 1.53E-05 | 0.000122 | 7.11E-05 | 1751 |
| GSE3982_MAST_CELL_VS_BCELL_UP                                      | 170 | 0.50472 | 1.814221 | 1.55E-05 | 0.000124 | 7.20E-05 | 1475 |

|                                                                           |     |         |          |          |          |          |      |
|---------------------------------------------------------------------------|-----|---------|----------|----------|----------|----------|------|
| GSE23308_CTRL_VS_CORTICOSTERONE_TREATED_MAC<br>ROPHAGE_DN                 | 163 | 0.50714 | 1.808585 | 1.56E-05 | 0.000124 | 7.22E-05 | 1717 |
| GSE3039_NKT_CELL_VS_B2_BCELL_DN                                           | 168 | 0.50881 | 1.831007 | 1.56E-05 | 0.000124 | 7.23E-05 | 1552 |
| GSE25085_FETAL_LIVER_VS_FETAL_BM_SP4_THYMIC_I<br>MPLANT_DN                | 158 | 0.5207  | 1.853055 | 1.60E-05 | 0.000127 | 7.41E-05 | 1933 |
| GSE25677_MPL_VS_R848_STIM_BCELL_DN                                        | 150 | 0.52483 | 1.85519  | 1.61E-05 | 0.000128 | 7.45E-05 | 2077 |
| GSE21380_NON_TFH_VS_TFH_CD4_TCELL_UP                                      | 157 | 0.52491 | 1.869553 | 1.62E-05 | 0.000128 | 7.46E-05 | 1562 |
| GSE33425_CD161_HIGH_VS_INT_CD8_TCELL_UP                                   | 168 | 0.50786 | 1.827573 | 1.70E-05 | 0.000134 | 7.82E-05 | 1514 |
| GSE18791_CTRL_VS_NEWCASTLE_VIRUS_DC_18H_DN                                | 147 | 0.531   | 1.873043 | 1.74E-05 | 0.000137 | 7.97E-05 | 2540 |
| GSE36527_CD62L_HIGH_VS_CD62L_LOW_TREG_CD69_N<br>EG_KLRG1_NEG_UP           | 161 | 0.51581 | 1.840113 | 1.74E-05 | 0.000137 | 7.99E-05 | 2692 |
| GSE39110_UNTREATED_VS_IL2_TREATED_CD8_TCELL_<br>DAY6_POST_IMMUNIZATION_DN | 155 | 0.51995 | 1.849928 | 1.81E-05 | 0.000142 | 8.27E-05 | 1777 |
| GSE6269_E_COLI_VS_STAPH_AUREUS_INF_PBMC_DN                                | 146 | 0.51827 | 1.830188 | 1.84E-05 | 0.000144 | 8.40E-05 | 2350 |
| GSE8921_UNSTIM_VS_TLR1_2_STIM_MONOCYTE_24H_U<br>P                         | 146 | 0.5178  | 1.828512 | 1.84E-05 | 0.000144 | 8.40E-05 | 1777 |
| GSE39556_UNTREATED_VS_3H_POLYIC_INJ_MOUSE_NK<br>_CELL_DN                  | 157 | 0.52436 | 1.867601 | 1.88E-05 | 0.000147 | 8.58E-05 | 2082 |
| GSE42088_2H_VS_24H_LEISHMANIA_INF_DC_UP                                   | 165 | 0.50641 | 1.813838 | 1.91E-05 | 0.00015  | 8.70E-05 | 1746 |
| GSE29615_CTRL_VS_LAIV_FLU_VACCINE_PBMC_UP                                 | 153 | 0.51898 | 1.841561 | 1.92E-05 | 0.00015  | 8.71E-05 | 988  |
| GSE3982_EOSINOPHIL_VS_CENT_MEMORY_CD4_TCELL<br>_UP                        | 169 | 0.50221 | 1.80546  | 1.93E-05 | 0.000151 | 8.77E-05 | 1826 |
| GSE3982_MAC_VS_TH1_UP                                                     | 158 | 0.51714 | 1.840384 | 1.99E-05 | 0.000155 | 9.00E-05 | 1696 |
| GSE17580_TREG_VS_TEFF_S_MANSONI_INF_UP                                    | 170 | 0.50125 | 1.801779 | 2.04E-05 | 0.000158 | 9.20E-05 | 1417 |
| GSE22140_HEALTHY_VS_ARTHITIC_GERMFREE_MOUS<br>E_CD4_TCELL_UP              | 155 | 0.51831 | 1.844093 | 2.09E-05 | 0.000162 | 9.40E-05 | 2012 |
| GSE22601_DOUBLE_POSITIVE_VS_CD8_SINGLE_POSITIV<br>E_THYMOCYTE_UP          | 160 | 0.50963 | 1.820311 | 2.09E-05 | 0.000162 | 9.40E-05 | 1960 |
| GSE22589_SIV_VS_HIV_AND_SIV_INFECTED_DC_UP                                | 161 | 0.51411 | 1.834068 | 2.09E-05 | 0.000162 | 9.42E-05 | 2347 |
| GSE34156_NOD2_LIGAND_VS_TLR1_TLR2_LIGAND_6H_<br>TREATED_MONOCYTE_UP       | 162 | 0.5057  | 1.803226 | 2.10E-05 | 0.000162 | 9.44E-05 | 2723 |
| GSE16385_UNTREATED_VS_12H_IFNG_TNF_TREATED_<br>MACROPHAGE_DN              | 145 | 0.51845 | 1.826139 | 2.13E-05 | 0.000164 | 9.56E-05 | 1407 |
| GSE21927_SPLEEN_C57BL6_VS_4T1_TUMOR_BALBC_MO<br>NOCYTES_DN                | 168 | 0.50563 | 1.819539 | 2.17E-05 | 0.000166 | 9.69E-05 | 1746 |

|                                                                           |     |         |          |          |          |          |      |
|---------------------------------------------------------------------------|-----|---------|----------|----------|----------|----------|------|
| GSE26030_TH1_VS_TH17_RESTIMULATED_DAY15_POST_POLARIZATION_UP              | 156 | 0.51367 | 1.828303 | 2.17E-05 | 0.000166 | 9.69E-05 | 1336 |
| GSE40274_CTRL_VS_FOXP3_AND_GATA1_TRANSDUCED_ACTIVATED_CD4_TCELL_UP        | 107 | 0.56024 | 1.910657 | 2.18E-05 | 0.000167 | 9.74E-05 | 1879 |
| GSE26030_TH1_VS_TH17_DAY15_POST_POLARIZATION_DN                           | 162 | 0.50458 | 1.799214 | 2.24E-05 | 0.000172 | 1.00E-04 | 1870 |
| GSE37605_TREG_VS_TCONV_NOD_FOXP3_FUSION_GFP_DN                            | 140 | 0.52416 | 1.840275 | 2.28E-05 | 0.000174 | 0.000101 | 2739 |
| GSE40277_GATA1_AND_SATB1_TRANSDUCED_VS_CTRL_CD4_TCELL_UP                  | 163 | 0.50339 | 1.795206 | 2.28E-05 | 0.000174 | 0.000101 | 1871 |
| GSE19198_CTRL_VS_IL21_TREATED_TCELL_6H_UP                                 | 155 | 0.51689 | 1.839021 | 2.30E-05 | 0.000175 | 0.000102 | 1569 |
| GSE43863_TH1_VS_TFH_MEMORY_CD4_TCELL_DN                                   | 170 | 0.49973 | 1.796291 | 2.31E-05 | 0.000176 | 0.000102 | 2368 |
| GSE3982_DC_VS_EFF_MEMORY_CD4_TCELL_UP                                     | 173 | 0.49067 | 1.773584 | 2.32E-05 | 0.000176 | 0.000102 | 1587 |
| GSE6259_DEC205_POS_DC_VS_BCELL_DN                                         | 137 | 0.52802 | 1.842517 | 2.32E-05 | 0.000176 | 0.000102 | 2013 |
| GSE28737_WT_VS_BCL6_HET_FOLLICULAR_BCELL_DN                               | 164 | 0.50813 | 1.816642 | 2.38E-05 | 0.00018  | 0.000105 | 1646 |
| GSE19772_CTRL_VS_HCMV_INF_MONOCYTES_UP                                    | 169 | 0.49948 | 1.795668 | 2.39E-05 | 0.000181 | 0.000105 | 2790 |
| GSE3982_EOSINOPHIL_VS_NEUTROPHIL_DN                                       | 157 | 0.52032 | 1.853203 | 2.48E-05 | 0.000187 | 0.000109 | 2633 |
| GSE5589_WT_VS_IL6_KO_LPS_AND_IL6_STIM_MACROPHAGE_45MIN_UP                 | 158 | 0.51403 | 1.829319 | 2.48E-05 | 0.000187 | 0.000109 | 2156 |
| GSE7460_CD8_TCELL_VS_CD4_TCELL_ACT_UP                                     | 147 | 0.52745 | 1.860509 | 2.49E-05 | 0.000187 | 0.000109 | 2354 |
| GSE22886_NAIVE_TCELL_VS_NKCELL_DN                                         | 162 | 0.50227 | 1.790966 | 2.49E-05 | 0.000187 | 0.000109 | 2882 |
| GSE22601_IMMATURE_CD4_SINGLE_POSITIVE_VS_CD8_SINGLE_POSITIVE_THYMOCYTE_UP | 166 | 0.50857 | 1.825228 | 2.49E-05 | 0.000187 | 0.000109 | 2675 |
| GSE29949_MICROGLIA_VS_DC_BRAIN_UP                                         | 163 | 0.50204 | 1.79039  | 2.53E-05 | 0.000189 | 0.00011  | 1962 |
| GSE5542_UNTREATED_VS_IFNG_TREATED_EPITHELIAL_CELLS_24H_UP                 | 152 | 0.5213  | 1.847318 | 2.53E-05 | 0.000189 | 0.00011  | 2188 |
| GSE29615_CTRL_VS_DAY3_LAIV_IFLU_VACCINE_PBMC_UP                           | 154 | 0.50896 | 1.811978 | 2.56E-05 | 0.000191 | 0.000111 | 3149 |
| GSE3982_BASOPHIL_VS_CENT_MEMORY_CD4_TCELL_UP                              | 162 | 0.50212 | 1.790462 | 2.56E-05 | 0.000191 | 0.000111 | 2560 |
| GSE17186_MEMORY_VS_CD21HIGH_TRANSITIONAL_BCELL_DN                         | 167 | 0.49851 | 1.792899 | 2.62E-05 | 0.000195 | 0.000114 | 2319 |
| GSE40666_NAIVE_VS_EFFECTOR_CD8_TCELL_WITH_IFNA_STIM_90MIN_UP              | 155 | 0.51497 | 1.832193 | 2.75E-05 | 0.000205 | 0.000119 | 2319 |
| GSE29949_CD8_NEG_DC_SPLEEN_VS_DC_BRAIN_DN                                 | 167 | 0.49796 | 1.790951 | 2.76E-05 | 0.000205 | 0.000119 | 2812 |

|                                                               |     |         |          |          |          |          |      |
|---------------------------------------------------------------|-----|---------|----------|----------|----------|----------|------|
| GSE37301_HEMATOPOIETIC_STEM_CELL_VS_RAG2_KO_NK_CELL_DN        | 144 | 0.52052 | 1.833285 | 2.77E-05 | 0.000205 | 0.00012  | 2133 |
| GSE19198_6H_VS_24H_IL21_TREATED_TCELL_UP                      | 166 | 0.50688 | 1.819131 | 2.81E-05 | 0.000208 | 0.000121 | 2268 |
| GSE17721_PAM3CSK4_VS_GADIQUIMOD_4H_BMDC_DN                    | 170 | 0.49695 | 1.78632  | 2.84E-05 | 0.00021  | 0.000122 | 2809 |
| GSE37605_C57BL6_VS_NOD_FOXP3_FUSION_GFP_TREG_DN               | 156 | 0.51029 | 1.816257 | 2.91E-05 | 0.000215 | 0.000125 | 2914 |
| GSE22140_HEALTHY_VS_ARTHROITIC_MOUSE_CD4_TCELL_UP             | 154 | 0.50768 | 1.807416 | 2.98E-05 | 0.000219 | 0.000128 | 1107 |
| GSE43955_TH0_VS_TGFB_IL6_IL23_TH17_ACT_CD4_TCELL_52H_UP       | 169 | 0.49537 | 1.780868 | 2.98E-05 | 0.000219 | 0.000128 | 2149 |
| GSE3982_DC_VS_NEUTROPHIL_DN                                   | 161 | 0.51052 | 1.821266 | 3.01E-05 | 0.000221 | 0.000129 | 2427 |
| GSE24081_CONTROLLER_VS_PROGRESSOR_HIV_SPECIFIC_CD8_TCELL_DN   | 154 | 0.50641 | 1.802913 | 3.08E-05 | 0.000226 | 0.000132 | 1947 |
| GSE6092_UNSTIM_VS_IFNG_STIM_ENDOTHELIAL_CELL_DN               | 163 | 0.49878 | 1.778771 | 3.13E-05 | 0.000229 | 0.000134 | 2310 |
| GSE14350_IL2RB_KO_VS_WT_TREG_DN                               | 164 | 0.50316 | 1.798858 | 3.15E-05 | 0.00023  | 0.000134 | 1562 |
| GSE43863_TFH_VS_LY6C_INT_CXCR5POS_MEMORY_CD4_TCELL_UP         | 159 | 0.50927 | 1.814037 | 3.19E-05 | 0.000233 | 0.000135 | 1882 |
| GSE43955_1H_VS_60H_ACT_CD4_TCELL_UP                           | 156 | 0.50874 | 1.81074  | 3.19E-05 | 0.000233 | 0.000135 | 1853 |
| GSE46606_IRF4_KO_VS_WT_CD40L_IL2_IL5_1DAY_STIMULATED_BCELL_DN | 143 | 0.52251 | 1.839554 | 3.20E-05 | 0.000233 | 0.000136 | 1382 |
| GSE22196_HEALTHY_VS_OBESE_MOUSE_SKIN_GAMMA_DELTA_TCELL_DN     | 163 | 0.49843 | 1.777509 | 3.24E-05 | 0.000235 | 0.000137 | 2235 |
| GSE20366_EX_VIVO_VS_DEC205_CONVERSION_NAIVE_CD4_TCELL_UP      | 160 | 0.50487 | 1.803319 | 3.24E-05 | 0.000236 | 0.000137 | 2103 |
| GSE2770_TGFB_AND_IL4_VS_IL12_TREATED_ACT_CD4_TCELL_2H_DN      | 146 | 0.51123 | 1.805318 | 3.27E-05 | 0.000237 | 0.000138 | 2797 |
| GSE6674_CPG_VS_CPG_AND_ANTI_IGM_STIM_BCELL_DN                 | 154 | 0.50519 | 1.79856  | 3.29E-05 | 0.000238 | 0.000139 | 1933 |
| GSE43863_NAIVE_VS_MEMORY_TFH_CD4_TCELL_D150_LCMV_UP           | 163 | 0.49806 | 1.776178 | 3.31E-05 | 0.000239 | 0.000139 | 2222 |
| GSE9988_ANTI_TREM1_AND_LPS_VS_VEHICLE_TREATED_MONOCYTES_DN    | 160 | 0.50464 | 1.802502 | 3.31E-05 | 0.000239 | 0.000139 | 2860 |
| GSE21360_NAIVE_VS_QUATERNARY_MEMORY_CD8_TCELL_DN              | 170 | 0.49532 | 1.780461 | 3.32E-05 | 0.00024  | 0.000139 | 2774 |

|                                                                                                   |     |         |          |          |          |          |      |
|---------------------------------------------------------------------------------------------------|-----|---------|----------|----------|----------|----------|------|
| GSE19401_PLN_VS_PEYERS_PATCH_FOLLICULAR_DC_D<br>N                                                 | 160 | 0.50401 | 1.800246 | 3.38E-05 | 0.000244 | 0.000142 | 2109 |
| GSE3039_ALPHAALPHA_VS_ALPHABETA_CD8_TCELL_D<br>N                                                  | 162 | 0.49818 | 1.776384 | 3.45E-05 | 0.000248 | 0.000144 | 2376 |
| GSE21546_UNSTIM_VS_ANTI_CD3_STIM_DP_THYMOCY<br>TES_UP                                             | 149 | 0.51607 | 1.824246 | 3.59E-05 | 0.000258 | 0.00015  | 2187 |
| GSE2826_WT_VS_BTK_KO_BCELL_DN                                                                     | 167 | 0.49505 | 1.780459 | 3.59E-05 | 0.000258 | 0.00015  | 1471 |
| GSE2405_0H_VS_1.5H_A_PHAGOCYTOPHILUM_STIM_NE<br>UTROPHIL_UP                                       | 163 | 0.49604 | 1.76897  | 3.66E-05 | 0.000262 | 0.000153 | 1470 |
| GSE22886_NAIVE_BCELL_VS_DC_DN                                                                     | 170 | 0.49293 | 1.771863 | 3.67E-05 | 0.000262 | 0.000153 | 2304 |
| GSE360_L_DONOVANI_VS_B_MALAYI_HIGH_DOSE_MA<br>C_DN                                                | 155 | 0.51128 | 1.819079 | 3.70E-05 | 0.000263 | 0.000153 | 1645 |
| GSE360_L_DONOVANI_VS_B_MALAYI_HIGH_DOSE_MA<br>C_UP                                                | 160 | 0.50311 | 1.797041 | 3.70E-05 | 0.000263 | 0.000153 | 1312 |
| GSE22282_HYPOXIA_VS_NORMOXIA_MYELOID_DC_UP                                                        | 165 | 0.49882 | 1.786638 | 3.71E-05 | 0.000263 | 0.000153 | 1936 |
| GSE29949_MICROGLIA_BRAIN_VS_MONOCYTE_BONE_<br>MARROW_DN                                           | 165 | 0.49888 | 1.786855 | 3.71E-05 | 0.000263 | 0.000153 | 2936 |
| GSE5679_PPARG_LIGAND_ROSIGLITAZONE_VS_ROSIGL<br>ITAZONE_AND_RARA_AAGONIST_AM580_TREATED_DC_<br>UP | 165 | 0.499   | 1.787301 | 3.71E-05 | 0.000263 | 0.000153 | 2027 |
| GSE9960_GRAM_POS_VS_GRAM_NEG_AND_POS_SEPSIS<br>_PBMC_DN                                           | 162 | 0.49718 | 1.77284  | 3.73E-05 | 0.000264 | 0.000154 | 1779 |
| GSE21380_NON_TFH_VS_TFH_CD4_TCELL_DN                                                              | 163 | 0.49531 | 1.766368 | 3.73E-05 | 0.000264 | 0.000154 | 2396 |
| GSE1740_MCSF_VS_MCSF_AND_IFNG_DAY2_DERIVED_<br>MACROPHAGE_UP                                      | 122 | 0.54085 | 1.873484 | 3.79E-05 | 0.000267 | 0.000155 | 1620 |
| GSE29949_MICROGLIA_BRAIN_VS_MONOCYTE_BONE_<br>MARROW_UP                                           | 156 | 0.50703 | 1.804647 | 3.79E-05 | 0.000267 | 0.000155 | 1914 |
| GSE36392_TYPE_2_MYELOID_VS_NEUTROPHIL_IL25_TR<br>EATED_LUNG_UP                                    | 156 | 0.50685 | 1.804018 | 3.79E-05 | 0.000267 | 0.000155 | 2082 |
| GSE33424_CD161_HIGH_VS_INT_CD8_TCELL_UP                                                           | 161 | 0.50725 | 1.809584 | 3.86E-05 | 0.000271 | 0.000158 | 1868 |
| GSE9006_HEALTHY_VS_TYPE_2_DIABETES_PBMC_AT_<br>DX_DN                                              | 160 | 0.50229 | 1.794086 | 3.91E-05 | 0.000275 | 0.00016  | 1182 |
| GSE45739_UNSTIM_VS_ACD3_ACD28_STIM_WT_CD4_TC<br>ELL_DN                                            | 159 | 0.50741 | 1.807411 | 3.93E-05 | 0.000276 | 0.00016  | 2363 |

|                                                                                  |     |         |          |          |          |          |      |
|----------------------------------------------------------------------------------|-----|---------|----------|----------|----------|----------|------|
| GSE24142_EARLY_THYMIC_PROGENITOR_VS_DN3_THY<br>MOCYTE_UP                         | 170 | 0.49172 | 1.767526 | 3.95E-05 | 0.000277 | 0.000161 | 1676 |
| GSE22886_NAIVE_VS_IGG_IGA_MEMORY_BCELL_DN                                        | 159 | 0.50649 | 1.804115 | 4.14E-05 | 0.00029  | 0.000169 | 2231 |
| GSE360_CTRL_VS_L_DONOVANI_DC_DN                                                  | 152 | 0.51515 | 1.825541 | 4.17E-05 | 0.000291 | 0.000169 | 2220 |
| GSE3982_MAC_VS_CENT_MEMORY_CD4_TCELL_UP                                          | 176 | 0.48683 | 1.763579 | 4.18E-05 | 0.000291 | 0.000169 | 2034 |
| GSE9006_TYPE_1_DIABETES_AT_DX_VS_4MONTH_POST<br>_DX_PBMC_UP                      | 160 | 0.50158 | 1.791571 | 4.19E-05 | 0.000292 | 0.00017  | 1913 |
| GSE33425_CD8_ALPHAALPHA_VS_ALPHABETA_CD161_<br>HIGH_TCELL_UP                     | 162 | 0.49571 | 1.767605 | 4.23E-05 | 0.000293 | 0.000171 | 1280 |
| GSE369_SOCS3_KO_VS_WT_LIVER_POST_IL6_INJECTIO<br>N_DN                            | 162 | 0.49571 | 1.767593 | 4.23E-05 | 0.000293 | 0.000171 | 2357 |
| GSE34205_RSV_VS_FLU_INF_INFANT_PBMC_DN                                           | 146 | 0.50643 | 1.788387 | 4.27E-05 | 0.000296 | 0.000173 | 1723 |
| GSE40068_CXCR5POS_BCL6POS_TFH_VS_CXCR5NEG_B<br>CL6NEG_CD4_TCELL_DN               | 159 | 0.50535 | 1.800057 | 4.29E-05 | 0.000297 | 0.000173 | 1753 |
| GSE2585_THYMIC_DC_VS_MTEC_DN                                                     | 169 | 0.49114 | 1.765664 | 4.31E-05 | 0.000298 | 0.000173 | 1909 |
| GSE8384_CTRL_VS_B_ABORTUS_4H_MAC_CELL_LINE_<br>DN                                | 148 | 0.5138  | 1.808185 | 4.39E-05 | 0.000303 | 0.000176 | 1684 |
| GSE27241_CTRL_VS_DIGOXIN_TREATED_CD4_TCELL_I<br>N_TH17_POLARIZING_CONDITIONS_UP  | 130 | 0.51814 | 1.80893  | 4.41E-05 | 0.000304 | 0.000177 | 1560 |
| KAECH_NAIVE_VS_DAY8_EFF_CD8_TCELL_DN                                             | 157 | 0.51186 | 1.823062 | 4.42E-05 | 0.000304 | 0.000177 | 1079 |
| GSE32164_RESTING_DIFFERENTIATED_VS_CMYC_INHIB<br>ITED_MACROPHAGE_DN              | 161 | 0.5057  | 1.804058 | 4.49E-05 | 0.000308 | 0.00018  | 2347 |
| GSE39820_TGFBETA1_IL6_VS_TGFBETA1_IL6_IL23A_TR<br>EATED_CD4_TCELL_UP             | 161 | 0.50547 | 1.803236 | 4.49E-05 | 0.000308 | 0.00018  | 2304 |
| GSE37605_FOXP3_FUSION_GFP_VS_IRES_GFP_TREG_C57<br>BL6_UP                         | 145 | 0.50937 | 1.794137 | 4.50E-05 | 0.000309 | 0.00018  | 2002 |
| GSE28737_BCL6_HET_VS_BCL6_KO_FOLLICULAR_BCEL<br>L_DN                             | 170 | 0.48963 | 1.759982 | 4.65E-05 | 0.000319 | 0.000185 | 1177 |
| GSE3982_CENT_MEMORY_CD4_TCELL_VS_NKCELL_DN                                       | 154 | 0.50155 | 1.785593 | 4.73E-05 | 0.000323 | 0.000188 | 1492 |
| GSE37534_UNTREATED_VS_GW1929_TREATED_CD4_TC<br>ELL_PPARG1_AND_FOXP3_TRASDUCED_UP | 163 | 0.49306 | 1.758341 | 4.73E-05 | 0.000323 | 0.000188 | 1808 |
| GSE40068_CXCR5NEG_BCL6NEG_CD4_TCELL_VS_CXCR<br>5POS_BCL6NEG_TFH_DN               | 158 | 0.50596 | 1.800584 | 4.78E-05 | 0.000326 | 0.00019  | 2352 |
| GSE34006_WT_VS_A2AR_KO_TREG_DN                                                   | 159 | 0.50322 | 1.792493 | 4.78E-05 | 0.000326 | 0.00019  | 2344 |

|                                                              |     |         |          |          |          |          |      |
|--------------------------------------------------------------|-----|---------|----------|----------|----------|----------|------|
| GSE46242_TH1_VS_ANERGIC_TH1_CD4_TCELL_WITH_EGR2_DELETED_UP   | 158 | 0.50558 | 1.799247 | 4.85E-05 | 0.000329 | 0.000192 | 1645 |
| GSE20715_0H_VS_24H_OZONE_LUNG_UP                             | 167 | 0.49072 | 1.764897 | 4.85E-05 | 0.000329 | 0.000192 | 2564 |
| GSE37605_TREG_VS_TCONV_C57BL6_FOXP3_FUSION_GFP_DN            | 139 | 0.52199 | 1.830116 | 4.88E-05 | 0.000331 | 0.000193 | 2352 |
| GSE36009_WT_VS_NLRP10_KO_DC_UP                               | 165 | 0.49549 | 1.774725 | 4.91E-05 | 0.000332 | 0.000193 | 1995 |
| GSE2826_XID_VS_BTK_KO_BCELL_DN                               | 167 | 0.49047 | 1.763989 | 4.92E-05 | 0.000333 | 0.000194 | 1349 |
| GSE21546_UNSTIM_VS_ANTI_CD3_STIM_SAP1A_KO_DP_THYMOCYTES_UP   | 159 | 0.50169 | 1.787032 | 4.99E-05 | 0.000336 | 0.000196 | 2164 |
| GSE27670_BLIMP1_VS_LMP1_TRANSDUCED_GC_BCELL_UP               | 159 | 0.50177 | 1.787306 | 4.99E-05 | 0.000336 | 0.000196 | 1403 |
| GSE3982_BCELL_VS_NKCELL_DN                                   | 159 | 0.50162 | 1.786773 | 4.99E-05 | 0.000336 | 0.000196 | 2141 |
| GSE24634_IL4_VS_CTRL_TREATED_NAIVE_CD4_TCELL_DAY10_UP        | 166 | 0.49861 | 1.789451 | 5.08E-05 | 0.000342 | 0.000199 | 1471 |
| GSE7852_LN_VS_THYMUS_TREG_UP                                 | 136 | 0.51935 | 1.817331 | 5.20E-05 | 0.000349 | 0.000203 | 1669 |
| GSE17721_CTRL_VS_CPG_2H_BMDC_DN                              | 156 | 0.50211 | 1.787165 | 5.21E-05 | 0.000349 | 0.000203 | 1423 |
| GSE13522_WT_VS_IFNAR_KO_SKIN_UP                              | 159 | 0.50119 | 1.785255 | 5.28E-05 | 0.000353 | 0.000206 | 2245 |
| GSE4590_LARGE_PRE_BCELL_VS_VPREB_POS_LARGE_PRE_BCELL_UP      | 143 | 0.51575 | 1.815748 | 5.36E-05 | 0.000358 | 0.000209 | 1759 |
| GSE23505_UNTREATED_VS_4DAY_IL6_IL1_IL23_TREATED_CD4_TCELL_DN | 158 | 0.50386 | 1.793107 | 5.41E-05 | 0.000361 | 0.00021  | 2116 |
| GSE7509_DC_VS_MONOCYTE_UP                                    | 161 | 0.50324 | 1.795281 | 5.41E-05 | 0.000361 | 0.00021  | 1696 |
| GSE17721_CTRL_VS_CPG_8H_BMDC_DN                              | 166 | 0.49742 | 1.785181 | 5.43E-05 | 0.000362 | 0.00021  | 2188 |
| GSE21360_NAIVE_VS_QUATERNARY_MEMORY_CD8_TCELL_UP             | 171 | 0.48237 | 1.739914 | 5.45E-05 | 0.000363 | 0.000211 | 2962 |
| GSE20754_WT_VS_TCF1_KO_MEMORY_CD8_TCELL_UP                   | 164 | 0.49585 | 1.772723 | 5.55E-05 | 0.000369 | 0.000215 | 2479 |
| GSE37301_HEMATOPOIETIC_STEM_CELL_VS_RAG2_KO_NK_CELL_UP       | 134 | 0.52091 | 1.820751 | 5.57E-05 | 0.000369 | 0.000215 | 1415 |
| GSE20366_TREG_VS_NAIVE_CD4_TCELL_DEC205_CONVERSION_UP        | 158 | 0.50306 | 1.790287 | 5.63E-05 | 0.000373 | 0.000217 | 1770 |
| GSE24671_CTRL_VS_BAKIMULC_INFECTED_MOUSE_SPLENOCYTES_DN      | 135 | 0.52114 | 1.821692 | 5.71E-05 | 0.000378 | 0.00022  | 1899 |
| GSE19923_HEB_KO_VS_HEB_AND_E2A_KO_DP_THYMOCYTE_DN            | 171 | 0.48164 | 1.737308 | 5.80E-05 | 0.000383 | 0.000223 | 2547 |
| GSE26343_UNSTIM_VS_LPS_STIM_MACROPHAGE_UP                    | 161 | 0.50239 | 1.792238 | 5.84E-05 | 0.000385 | 0.000224 | 1531 |

|                                                                       |     |         |          |          |          |          |      |
|-----------------------------------------------------------------------|-----|---------|----------|----------|----------|----------|------|
| GSE45365_NK_CELL_VS_CD8_TCELL_MCMV_INFECTIO<br>N_UP                   | 161 | 0.5022  | 1.791563 | 5.84E-05 | 0.000385 | 0.000224 | 2559 |
| GSE17721_12H_VS_24H_POLYIC_BMDC_UP                                    | 167 | 0.48689 | 1.751114 | 5.90E-05 | 0.000388 | 0.000226 | 1875 |
| GSE17721_12H_VS_24H_PAM3CSK4_BMDC_UP                                  | 169 | 0.48718 | 1.751419 | 6.06E-05 | 0.000398 | 0.000232 | 2430 |
| GSE11057_EFF_MEM_VS_CENT_MEM_CD4_TCELL_UP                             | 150 | 0.51013 | 1.80324  | 6.09E-05 | 0.000399 | 0.000233 | 2470 |
| GSE7460_TREG_VS_TCONV_ACT_UP                                          | 156 | 0.49988 | 1.779216 | 6.20E-05 | 0.000406 | 0.000237 | 2778 |
| GSE19198_1H_VS_24H_IL21_TREATED_TCELL_UP                              | 165 | 0.49149 | 1.760408 | 6.25E-05 | 0.000409 | 0.000238 | 2221 |
| GSE26559_TCF1_KO_VS_WT_LIN_NEG_CELL_UP                                | 164 | 0.49443 | 1.767643 | 6.26E-05 | 0.000409 | 0.000238 | 1954 |
| GSE1460_CD4_THYMOCYTE_VS_NAIVE_CD4_TCELL_AD<br>ULT_BLOOD_UP           | 169 | 0.48659 | 1.749295 | 6.27E-05 | 0.000409 | 0.000238 | 2452 |
| GSE6259_FLT3L_INDUCED_33D1_POS_DC_VS_CD8_TCEL<br>L_DN                 | 121 | 0.53842 | 1.858721 | 6.27E-05 | 0.000409 | 0.000238 | 1678 |
| GSE26030_TH1_VS_TH17_DAY5_POST_POLARIZATION_D<br>N                    | 162 | 0.49251 | 1.756163 | 6.29E-05 | 0.000409 | 0.000238 | 1961 |
| GSE3982_DC_VS_NKCELL_UP                                               | 167 | 0.4862  | 1.748652 | 6.39E-05 | 0.000415 | 0.000242 | 2495 |
| GSE9988_LOW_LPS_VS_ANTI_TREM1_AND_LPS_MONOC<br>YTE_DN                 | 148 | 0.50863 | 1.79001  | 6.42E-05 | 0.000417 | 0.000243 | 1708 |
| GSE10325_BCELL_VS_MYELOID_UP                                          | 152 | 0.50924 | 1.804583 | 6.44E-05 | 0.000418 | 0.000243 | 1643 |
| GSE17721_0.5H_VS_4H_GARDIQUIMOD_BMDC_DN                               | 164 | 0.49363 | 1.764794 | 6.62E-05 | 0.000428 | 0.000249 | 2300 |
| GSE40274_XBP1_VS_FOXP3_AND_XBP1_TRANSDUCE<br>D_ACTIVATED_CD4_TCELL_UP | 165 | 0.49031 | 1.75617  | 6.67E-05 | 0.000431 | 0.000251 | 2133 |
| GSE17721_12H_VS_24H_LPS_BMDC_UP                                       | 167 | 0.48561 | 1.746523 | 6.80E-05 | 0.00044  | 0.000256 | 1289 |
| GSE13738_RESTING_VS_BYSTANDER_ACTIVATED_CD4<br>_TCELL_DN              | 166 | 0.49465 | 1.775266 | 6.83E-05 | 0.000441 | 0.000256 | 2485 |
| GSE18791_CTRL_VS_NEWCASTLE_VIRUS_DC_14H_DN                            | 145 | 0.50349 | 1.773428 | 6.88E-05 | 0.000443 | 0.000258 | 1924 |
| GSE369_PRE_VS_POST_IL6_INJECTION_SOCS3_KO_LIVE<br>R_UP                | 166 | 0.49431 | 1.774039 | 6.90E-05 | 0.000443 | 0.000258 | 1721 |
| GSE9037_CTRL_VS_LPS_1H_STIM_BMDM_DN                                   | 154 | 0.4974  | 1.770823 | 6.90E-05 | 0.000443 | 0.000258 | 2010 |
| GSE29617_DAY3_VS_DAY7_TIV_FLU_VACCINE_PBMC_2<br>008_UP                | 151 | 0.50537 | 1.790255 | 6.97E-05 | 0.000447 | 0.00026  | 1455 |
| GSE3982_MAST_CELL_VS_DC_DN                                            | 169 | 0.48475 | 1.742682 | 6.97E-05 | 0.000447 | 0.00026  | 2504 |
| GSE28737_WT_VS_BCL6_HET_MARGINAL_ZONE_BCELL<br>_DN                    | 160 | 0.49402 | 1.764558 | 7.15E-05 | 0.000458 | 0.000267 | 2042 |
| GSE34156_UNTREATED_VS_6H_NOD2_LIGAND_TREATE<br>D_MONOCYTE_DN          | 142 | 0.51376 | 1.804798 | 7.19E-05 | 0.00046  | 0.000268 | 2430 |

|                                                                        |     |         |          |          |          |          |      |
|------------------------------------------------------------------------|-----|---------|----------|----------|----------|----------|------|
| GSE17721_POLYIC_VS_GARDIQUIMOD_1H_BMDC_DN                              | 163 | 0.48896 | 1.743755 | 7.22E-05 | 0.000461 | 0.000268 | 2752 |
| GSE42088_UNINF_VS_LEISHMANIA_INF_DC_24H_UP                             | 154 | 0.49625 | 1.766714 | 7.25E-05 | 0.000462 | 0.000269 | 1645 |
| GSE28726_ACT_CD4_TCELL_VS_ACT_NKTCELL_UP                               | 169 | 0.48274 | 1.735464 | 7.39E-05 | 0.000471 | 0.000274 | 2610 |
| GSE7219_WT_VS_NIK_NFKB2_KO_LPS_AND_ANTI_CD40_STIM_DC_DN                | 160 | 0.49391 | 1.764166 | 7.44E-05 | 0.000473 | 0.000275 | 1621 |
| GSE17974_0H_VS_12H_IN_VITRO_ACT_CD4_TCELL_UP                           | 138 | 0.50849 | 1.779803 | 7.68E-05 | 0.000487 | 0.000284 | 2223 |
| GSE17974_CTRL_VS_ACT_IL4_AND_ANTI_IL12_0.5H_CD4_TCELL_DN               | 134 | 0.51578 | 1.802821 | 7.68E-05 | 0.000487 | 0.000284 | 1886 |
| GSE3982_NEUTROPHIL_VS_NKCELL_UP                                        | 164 | 0.49208 | 1.759255 | 7.75E-05 | 0.000491 | 0.000286 | 2881 |
| GSE1791_CTRL_VS_NEUROMEDINU_IN_T_CELL_LINE_6H_UP                       | 158 | 0.49785 | 1.771739 | 7.89E-05 | 0.000499 | 0.000291 | 2415 |
| GSE23568_ID3_TRANSDUCED_VS_ID3_KO_CD8_TCELL_DN                         | 162 | 0.48919 | 1.744338 | 8.07E-05 | 0.00051  | 0.000297 | 1183 |
| GSE32901_NAIVE_VS_TH1_CD4_TCELL_DN                                     | 138 | 0.50828 | 1.779064 | 8.12E-05 | 0.000512 | 0.000298 | 1768 |
| GSE15733_BM_VS_SPLEEN_MEMORY_CD4_TCELL_UP                              | 156 | 0.49546 | 1.763472 | 8.19E-05 | 0.000516 | 0.0003   | 1628 |
| GSE22601_IMMATURE_CD4_SINGLE_POSITIVE_VS_DOUBLE_POSITIVE_THYMOCYTE_DN  | 168 | 0.48731 | 1.753631 | 8.34E-05 | 0.000525 | 0.000305 | 2551 |
| GSE8835_HEALTHY_VS_CLL_CD8_TCELL_DN                                    | 163 | 0.48748 | 1.738463 | 8.36E-05 | 0.000526 | 0.000306 | 1384 |
| GSE29949_MICROGLIA_BRAIN_VS_CD8_POS_DC_SPLEEN_DN                       | 175 | 0.47711 | 1.727793 | 8.37E-05 | 0.000526 | 0.000306 | 1151 |
| GSE5542_UNTREATED_VS_IFNA_TREATED_EPITHELIAL_CELLS_24H_UP              | 162 | 0.48884 | 1.743099 | 8.49E-05 | 0.000533 | 0.00031  | 2922 |
| GSE1791_CTRL_VS_NEUROMEDINU_IN_T_CELL_LINE_0.8H_DN                     | 133 | 0.5194  | 1.818891 | 8.66E-05 | 0.000542 | 0.000316 | 1652 |
| GSE25123_WT_VS_PPARG_KO_MACROPHAGE_ROSIGLITAZONE_STIM_UP               | 165 | 0.48804 | 1.748029 | 8.72E-05 | 0.000546 | 0.000318 | 1625 |
| GSE16385_UNTREATED_VS_12H_ROSIGLITAZONE_IFNG_TNF_TREATED_MACROPHAGE_UP | 161 | 0.49553 | 1.767797 | 8.75E-05 | 0.000546 | 0.000318 | 1933 |
| GSE46606_DAY1_VS_DAY3_CD40L_IL2_IL5_STIMULATE_D_IRF4HIGH_BCELL_DN      | 161 | 0.49544 | 1.767468 | 8.75E-05 | 0.000546 | 0.000318 | 1774 |
| GSE1791_CTRL_VS_NEUROMEDINU_IN_T_CELL_LINE_3H_UP                       | 128 | 0.51979 | 1.807311 | 8.78E-05 | 0.000547 | 0.000319 | 1697 |
| GSE17721_0.5H_VS_8H_GARDIQUIMOD_BMDC_DN                                | 162 | 0.48766 | 1.738875 | 9.06E-05 | 0.000564 | 0.000328 | 2582 |
| GSE17721_12H_VS_24H_GARDIQUIMOD_BMDC_UP                                | 159 | 0.49403 | 1.759755 | 9.47E-05 | 0.000588 | 0.000343 | 2253 |

|                                                               |     |         |          |          |          |          |      |
|---------------------------------------------------------------|-----|---------|----------|----------|----------|----------|------|
| GSE5542_IFNA_VS_IFNA_AND_IFNG_TREATED_EPITHELIAL_CELLS_24H_UP | 166 | 0.49053 | 1.760454 | 9.50E-05 | 0.00059  | 0.000343 | 2228 |
| GSE43955_TH0_VS_TGFB_IL6_TH17_ACT_CD4_TCELL_4H_DN             | 165 | 0.48625 | 1.741617 | 9.58E-05 | 0.000593 | 0.000345 | 1296 |
| GSE22886_IGG_IGA_MEMORY_BCELL_VS_BLOOD_PLASMA_CELL_DN         | 157 | 0.50087 | 1.783934 | 9.60E-05 | 0.000593 | 0.000345 | 2070 |
| GSE3039_CD4_TCELL_VS_B2_BCELL_UP                              | 161 | 0.49446 | 1.763966 | 9.60E-05 | 0.000593 | 0.000345 | 1777 |
| GSE3982_NEUTROPHIL_VS_TH1_UP                                  | 157 | 0.50026 | 1.78174  | 9.60E-05 | 0.000593 | 0.000345 | 2143 |
| GSE19401_UNSTIM_VS_RETINOIC_ACID_STIM_FOLLICULAR_DC_UP        | 166 | 0.48947 | 1.756662 | 9.64E-05 | 0.000595 | 0.000346 | 1997 |
| GSE5099_CLASSICAL_M1_VS_ALTERNATIVE_M2_MACROPHAGE_DN          | 131 | 0.51589 | 1.79863  | 9.78E-05 | 0.000602 | 0.000351 | 1539 |
| GSE2405_0H_VS_3H_A_PHAGOCYTOPHILUM_STIM_NEUTROPHIL_DN         | 138 | 0.50649 | 1.772788 | 9.87E-05 | 0.000607 | 0.000354 | 1713 |
| GSE17974_0H_VS_0.5H_IN_VITRO_ACT_CD4_TCELL_DN                 | 136 | 0.5107  | 1.787053 | 0.000102 | 0.000624 | 0.000363 | 1886 |
| GSE7831_UNSTIM_VS_INFLUENZA_STIM_PDC_4H_UP                    | 164 | 0.48876 | 1.747367 | 0.000102 | 0.000624 | 0.000363 | 2191 |
| GSE17721_CTRL_VS_POLYIC_4H_BMDC_DN                            | 168 | 0.48442 | 1.743246 | 0.000103 | 0.000631 | 0.000367 | 2469 |
| GSE29618_PDC_VS_MDC_UP                                        | 158 | 0.49465 | 1.760359 | 0.000103 | 0.000631 | 0.000367 | 2059 |
| GSE39820_IL1B_IL6_VS_IL1B_IL6_IL23A_TREATED_CD4_TCELL_DN      | 154 | 0.49337 | 1.756479 | 0.000103 | 0.000632 | 0.000368 | 1477 |
| GSE5455_HEALTHY_VS_TUMOR_BEARING_MOUSE_SPLEEN_MONOCYTE_UP     | 162 | 0.48622 | 1.733759 | 0.000103 | 0.000632 | 0.000368 | 2289 |
| GSE39820_CTRL_VS_TGFBETA1_IL6_CD4_TCELL_UP                    | 162 | 0.48608 | 1.733244 | 0.000105 | 0.00064  | 0.000373 | 2605 |
| GSE15930_STIM_VS_STIM_AND_IL12_48H_CD8_T_CELL_DN              | 161 | 0.4933  | 1.759817 | 0.000106 | 0.000645 | 0.000376 | 2548 |
| GSE39820_CTRL_VS_IL1B_IL6_CD4_TCELL_UP                        | 160 | 0.48917 | 1.747238 | 0.000108 | 0.000659 | 0.000384 | 2334 |
| GSE44649_WT_VS_MIR155_KO_ACTIVATED_CD8_TCELL_UP               | 164 | 0.48807 | 1.744928 | 0.000109 | 0.000661 | 0.000385 | 2048 |
| GSE22140_GERMFREE_VS_SPF_MOUSE_CD4_TCELL_DN                   | 162 | 0.48432 | 1.72697  | 0.000111 | 0.000671 | 0.000391 | 2470 |
| GSE3982_DC_VS_TH2_UP                                          | 168 | 0.48311 | 1.738532 | 0.000111 | 0.000675 | 0.000393 | 2641 |
| GSE15930_STIM_VS_STIM_AND_TRICHOSTATINA_48H_CD8_T_CELL_UP     | 164 | 0.48778 | 1.74389  | 0.000113 | 0.000684 | 0.000398 | 2347 |
| GSE36826_WT_VS_IL1R_KO_SKIN_DN                                | 161 | 0.49278 | 1.757957 | 0.000113 | 0.000684 | 0.000398 | 1519 |
| GSE17301_ACD3_ACD28_VS_ACD3_ACD28_AND_IFNA2_STIM_CD8_TCELL_DN | 156 | 0.49155 | 1.74955  | 0.000113 | 0.000684 | 0.000398 | 1931 |

|                                                                                    |     |         |          |          |          |          |      |
|------------------------------------------------------------------------------------|-----|---------|----------|----------|----------|----------|------|
| GSE23505_UNTREATED_VS_4DAY_IL6_IL1_IL23_TREAT<br>D_CD4_TCELL_UP                    | 152 | 0.50184 | 1.778358 | 0.000115 | 0.000695 | 0.000405 | 1685 |
| GSE6259_BCELL_VS_CD8_TCELL_UP                                                      | 155 | 0.49728 | 1.769273 | 0.000115 | 0.000696 | 0.000405 | 2799 |
| GSE4748_CYANOBACTERIUM_LPSLIKE_VS_LPS_AND_C<br>YANOBACTERIUM_LPSLIKE_STIM_DC_3H_UP | 144 | 0.5026  | 1.770148 | 0.000116 | 0.000699 | 0.000407 | 2042 |
| GSE25087_TREG_VS_TCONV_FETUS_UP                                                    | 156 | 0.49097 | 1.747515 | 0.000119 | 0.000714 | 0.000415 | 2045 |
| GSE360_L_DONOVANI_VS_T_GONDII_MAC_UP                                               | 159 | 0.49067 | 1.747778 | 0.000119 | 0.000714 | 0.000415 | 2433 |
| GSE17721_CTRL_VS_PAM3CSK4_1H_BMDC_DN                                               | 154 | 0.49123 | 1.748836 | 0.00012  | 0.000722 | 0.00042  | 2810 |
| GSE16450_CTRL_VS_IFNA_6H_STIM_IMMATURE_NEUR<br>ON_CELL_LINE_UP                     | 149 | 0.50118 | 1.771613 | 0.000121 | 0.000722 | 0.00042  | 1987 |
| GSE18804_SPLEEN_MACROPHAGE_VS_COLON_TUMOR<br>AL_MACROPHAGE_UP                      | 171 | 0.47448 | 1.711481 | 0.000121 | 0.000722 | 0.00042  | 2637 |
| HALLMARK_APOPTOSIS                                                                 | 140 | 0.50166 | 1.761282 | 0.000121 | 0.000723 | 0.000421 | 2568 |
| GSE3982_BASOPHIL_VS_EFF_MEMORY_CD4_TCELL_UP                                        | 167 | 0.47812 | 1.71957  | 0.000123 | 0.000732 | 0.000426 | 2611 |
| GSE11961_MEMORY_BCELL_DAY7_VS_GERMINAL_CEN<br>TER_BCELL_DAY7_UP                    | 164 | 0.48635 | 1.738761 | 0.000124 | 0.000742 | 0.000432 | 2883 |
| GSE41867_NAIVE_VS_DAY6_LCMV_EFFECTOR_CD8_TC<br>ELL_UP                              | 166 | 0.48631 | 1.745315 | 0.000125 | 0.000742 | 0.000432 | 2140 |
| GSE3982_MAST_CELL_VS_BASOPHIL_DN                                                   | 161 | 0.49062 | 1.75026  | 0.000126 | 0.000748 | 0.000436 | 1808 |
| GSE3039_CD4_TCELL_VS_B1_BCELL_UP                                                   | 160 | 0.4875  | 1.741267 | 0.000127 | 0.000753 | 0.000438 | 1497 |
| GSE21927_UNTREATED_VS_GMCSF_IL6_TREATED_BON<br>E_MARROW_DN                         | 135 | 0.50735 | 1.773468 | 0.000128 | 0.000759 | 0.000442 | 2300 |
| GSE13522_CTRL_VS_T_CRUZI_Y_STRAIN_INF_SKIN_IFN<br>AR_KO_DN                         | 160 | 0.48737 | 1.7408   | 0.000128 | 0.000759 | 0.000442 | 2960 |
| GSE19888_ADENOSINE_A3R_INH_VS_ACT_IN_MAST_CE<br>LL_DN                              | 151 | 0.49844 | 1.765698 | 0.000129 | 0.000761 | 0.000443 | 1395 |
| GSE24142_DN2_VS_DN3_THYMOCYTE_UP                                                   | 169 | 0.47479 | 1.706874 | 0.00013  | 0.00077  | 0.000448 | 1621 |
| GSE17721_ALL_VS_24H_PAM3CSK4_BMDC_UP                                               | 162 | 0.48204 | 1.718843 | 0.000136 | 0.000805 | 0.000468 | 2111 |
| GSE3982_NEUTROPHIL_VS_TH2_UP                                                       | 160 | 0.48683 | 1.738867 | 0.000137 | 0.000806 | 0.000469 | 2084 |
| GSE17721_PAM3CSK4_VS_GADIQUIMOD_0.5H_BMDC_U                                        | 158 | 0.49005 | 1.743992 | 0.000139 | 0.000815 | 0.000475 | 1858 |
| GSE3982_MAC_VS_NEUTROPHIL_DN                                                       | 158 | 0.49009 | 1.744117 | 0.000139 | 0.000815 | 0.000475 | 2145 |
| GSE17974_CTRL_VS_ACT_IL4_AND_ANTI_IL12_48H_CD4<br>_TCELL_UP                        | 128 | 0.51248 | 1.781873 | 0.000139 | 0.000819 | 0.000477 | 1890 |
| GSE41867_NAIVE_VS_DAY8_LCMV_CLONE13_EFFECTO<br>R_CD8_TCELL_UP                      | 156 | 0.48802 | 1.737011 | 0.00014  | 0.000823 | 0.000479 | 2746 |

|                                                                                     |     |         |          |          |          |          |      |
|-------------------------------------------------------------------------------------|-----|---------|----------|----------|----------|----------|------|
| GSE17322_CD103_POS_VS_CD11B_HIGH_LUNG_DC_UP                                         | 152 | 0.49902 | 1.768368 | 0.000141 | 0.000824 | 0.00048  | 2300 |
| GSE19198_CTRL_VS_IL21_TREATED_TCELL_1H_DN                                           | 160 | 0.48596 | 1.73578  | 0.000141 | 0.000824 | 0.00048  | 1552 |
| GSE369_PRE_VS_POST_IL6_INJECTION_IFNG_KO_LIVER_DN                                   | 160 | 0.48603 | 1.736029 | 0.000141 | 0.000824 | 0.00048  | 1590 |
| GSE9988_LPS_VS_LPS_AND_ANTI_TREM1_MONOCYTE_DN                                       | 155 | 0.49311 | 1.754421 | 0.000144 | 0.00084  | 0.000489 | 2033 |
| GSE19888_ADENOSINE_A3R_ACT_VS_TCELL_MEMBRES_ACT_AND_A3R_INH_PRETREAT_IN_MAST_CELL_D | 146 | -0.3967 | -1.66415 | 0.000144 | 0.000841 | 0.000489 | 3311 |
| GSE32423_IL7_VS_IL7_IL4_NAIVE_CD8_TCELL_DN                                          | 164 | 0.48393 | 1.73012  | 0.000144 | 0.000841 | 0.000489 | 2081 |
| GSE28726_NAIVE_CD4_TCELL_VS_NAIVE_NKTCCELL_UP                                       | 162 | 0.48107 | 1.715393 | 0.000145 | 0.000843 | 0.000491 | 2636 |
| GSE339_EX_VIVO_VS_IN_CULTURE_CD8POS_DC_DN                                           | 167 | 0.47511 | 1.70876  | 0.000145 | 0.000843 | 0.000491 | 2381 |
| GSE37533_PPARG1_FOXP3_VS_FOXP3_TRANSDUCECD4_TCELL_PIOGLITAZONE_TREATED_UP           | 167 | 0.47534 | 1.709568 | 0.000145 | 0.000843 | 0.000491 | 2568 |
| GSE22589_HIV_VS_HIV_AND_SIV_INFECTED_DC_UP                                          | 139 | 0.50637 | 1.775326 | 0.000148 | 0.000855 | 0.000498 | 2467 |
| GSE35543_IN_VIVO_NTREG_VS_IN_VITRO_ITREG_DN                                         | 133 | 0.51173 | 1.79201  | 0.000148 | 0.000855 | 0.000498 | 1930 |
| GSE3039_ALPHAALPHA_VS_ALPHABETA_CD8_TCELL_UP                                        | 168 | 0.47819 | 1.720821 | 0.000151 | 0.000871 | 0.000507 | 1470 |
| GSE40274_FOXP3_VS_FOXP3_AND_EOS_TRANSDUCEACTIVATED_CD4_TCELL_UP                     | 163 | 0.4793  | 1.709272 | 0.000151 | 0.000871 | 0.000507 | 2376 |
| GSE23568_ID3_TRANSDUCECD4_TCELL_UP                                                  | 157 | 0.49491 | 1.762696 | 0.000153 | 0.00088  | 0.000512 | 2444 |
| GSE43955_10H_VS_60H_ACT_CD4_TCELL_WITH_TGFB_IL6_DN                                  | 157 | 0.49464 | 1.76175  | 0.000153 | 0.00088  | 0.000512 | 1361 |
| GSE8835_CD4_VS_CD8_TCELL_CLL_PATIENT_DN                                             | 158 | 0.48851 | 1.738491 | 0.000153 | 0.00088  | 0.000512 | 996  |
| GSE45365_WT_VS_IFNAR_KO_CD8A_DC_DN                                                  | 159 | 0.48638 | 1.732489 | 0.000153 | 0.00088  | 0.000512 | 2564 |
| GSE14415_NATURAL_TREG_VS_FOXP3_KO_NATURAL_TREG_UP                                   | 120 | 0.52035 | 1.799207 | 0.000153 | 0.00088  | 0.000512 | 2360 |
| GSE40274_FOXP3_VS_FOXP3_AND_SATB1_TRANSDUCEACTIVATED_CD4_TCELL_UP                   | 103 | 0.53948 | 1.837207 | 0.000159 | 0.000912 | 0.000531 | 1355 |
| GSE7219_WT_VS_NIK_NFKB2_KO_DC_DN                                                    | 142 | 0.50202 | 1.763564 | 0.000159 | 0.000912 | 0.000531 | 2163 |
| GSE21379_WT_VS_SAP_KO_TFH_CD4_TCELL_DN                                              | 151 | 0.49607 | 1.757309 | 0.00016  | 0.000917 | 0.000534 | 1954 |
| GSE40274_FOXP3_VS_FOXP3_AND_SATB1_TRANSDUCEACTIVATED_CD4_TCELL_DN                   | 149 | 0.49904 | 1.764051 | 0.000161 | 0.000921 | 0.000536 | 2053 |
| GSE2128_CTRL_VS_MIMETOPE_NEGATIVE_SELECTION_DP_THYMOCYTE_C57BL6_UP                  | 138 | 0.4998  | 1.749386 | 0.000163 | 0.000932 | 0.000542 | 2403 |

|                                                                               |     |         |          |          |          |          |      |
|-------------------------------------------------------------------------------|-----|---------|----------|----------|----------|----------|------|
| GSE5099_CLASSICAL_M1_VS_ALTERNATIVE_M2_MACR<br>OPHAGE_UP                      | 146 | 0.49079 | 1.733145 | 0.000167 | 0.000952 | 0.000554 | 1876 |
| GSE2770_TGFB_AND_IL4_VS_IL12_TREATED_ACT_CD4_<br>TCELL_48H_DN                 | 156 | 0.48601 | 1.729848 | 0.000167 | 0.000954 | 0.000555 | 1859 |
| GSE17721_CTRL_VS_GARDIQUIMOD_1H_BMDC_DN                                       | 161 | 0.48433 | 1.727829 | 0.00017  | 0.000968 | 0.000563 | 1900 |
| GSE13522_WT_VS_IFNAR_KO_SKIN_DN                                               | 140 | 0.49508 | 1.738181 | 0.00017  | 0.000969 | 0.000564 | 2440 |
| GSE16266_LPS_VS_HEATSHOCK_AND_LPS_STIM_MEF_<br>UP                             | 163 | 0.47692 | 1.700807 | 0.000171 | 0.00097  | 0.000565 | 1777 |
| GSE3982_EOSINOPHIL_VS_TH1_UP                                                  | 151 | 0.495   | 1.753517 | 0.000172 | 0.000974 | 0.000567 | 1538 |
| GSE21546_WT_VS_SAP1A_KO_AND_ELK1_KO_DP_THY<br>MOCYTES_UP                      | 155 | 0.49113 | 1.747372 | 0.000172 | 0.000976 | 0.000568 | 2036 |
| GSE20366_TREG_VS_NAIVE_CD4_TCELL_HOMEOSTATI<br>C_CONVERSION_DN                | 168 | 0.47563 | 1.711601 | 0.000176 | 0.000996 | 0.00058  | 2412 |
| GSE3039_B2_VS_B1_BCELL_DN                                                     | 156 | -0.3817 | -1.61784 | 0.000179 | 0.00101  | 0.000588 | 2497 |
| GSE12845_IGD_POS_VS_NEG_BLOOD_BCELL_DN                                        | 155 | 0.49061 | 1.745512 | 0.000181 | 0.001021 | 0.000594 | 2594 |
| GSE17721_PAM3CSK4_VS_GADIQUIMOD_6H_BMDC_DN                                    | 172 | 0.46356 | 1.67308  | 0.000183 | 0.001033 | 0.000602 | 1804 |
| GSE21360_NAIVE_VS_PRIMARY_MEMORY_CD8_TCELL_<br>DN                             | 152 | 0.49601 | 1.757711 | 0.000188 | 0.001061 | 0.000618 | 2446 |
| GSE13485_CTRL_VS_DAY3_YF17D_VACCINE_PBMC_UP                                   | 128 | 0.50837 | 1.767599 | 0.000203 | 0.001143 | 0.000665 | 2091 |
| GSE13411_PLASMA_CELL_VS_MEMORY_BCELL_UP                                       | 161 | 0.48261 | 1.721699 | 0.000204 | 0.001148 | 0.000668 | 1325 |
| GSE10240_CTRL_VS_IL22_STIM_PRIMARY_BRONCHIAL_<br>EPITHELIAL_CELLS_UP          | 152 | 0.49515 | 1.754668 | 0.000206 | 0.001154 | 0.000672 | 2411 |
| GSE7348_LPS_VS_TOLERIZED_AND_LPS_STIM_MACROP<br>HAGE_DN                       | 142 | 0.4976  | 1.748038 | 0.000206 | 0.001154 | 0.000672 | 2484 |
| GSE26669_CD4_VS_CD8_TCELL_IN_MLR_COSTIM_BLOC<br>K_DN                          | 154 | 0.48591 | 1.729901 | 0.000208 | 0.001165 | 0.000678 | 1609 |
| GSE17974_0H_VS_48H_IN_VITRO_ACT_CD4_TCELL_UP                                  | 142 | 0.49741 | 1.747342 | 0.000209 | 0.001168 | 0.00068  | 2000 |
| GSE20715_WT_VS_TLR4_KO_LUNG_UP                                                | 177 | 0.47002 | 1.705763 | 0.000209 | 0.00117  | 0.000681 | 2028 |
| GSE21063_CTRL_VS_ANTI_IGM_STIM_BCELL_3H_UP                                    | 136 | 0.50118 | 1.753738 | 0.00021  | 0.001171 | 0.000682 | 2095 |
| GSE12845_NAIVE_VS_DARKZONE_GC_TONSIL_BCELL_<br>UP                             | 158 | 0.48455 | 1.724395 | 0.000213 | 0.001186 | 0.00069  | 2470 |
| GSE46606_IRF4MID_VS_WT_CD40L_IL2_IL5_DAY3_STIM<br>ULATED_BCELL_UP             | 161 | 0.48167 | 1.718342 | 0.000213 | 0.001186 | 0.00069  | 2410 |
| GSE26290_CTRL_VS_AKT_INHIBITOR_TREATED_ANTI_<br>CD3_AND_IL2_STIM_CD8_TCELL_UP | 166 | 0.47795 | 1.715314 | 0.000219 | 0.00122  | 0.00071  | 1271 |

|                                                                   |     |         |          |          |          |          |      |
|-------------------------------------------------------------------|-----|---------|----------|----------|----------|----------|------|
| GSE28449_WT_VS_LRF_KO_GERMINAL_CENTER_BCELL_UP                    | 160 | 0.48028 | 1.715477 | 0.000221 | 0.001226 | 0.000714 | 1902 |
| GSE25088_WT_VS_STAT6_KO_MACROPHAGE_ROSIGLIT_AZONE_AND_IL4_STIM_DN | 158 | 0.4835  | 1.720655 | 0.00023  | 0.001277 | 0.000743 | 2146 |
| GSE29618_BCELL_VS_MONOCYTE_UP                                     | 143 | 0.49927 | 1.757735 | 0.000231 | 0.001281 | 0.000745 | 2391 |
| GSE20366_EX_VIVO_VS_DEC205_CONVERSION_NAIVE_CD4_TCELL_DN          | 148 | 0.49414 | 1.739008 | 0.000233 | 0.001289 | 0.00075  | 1155 |
| GSE36078_UNTREATED_VS_AD5_INF_MOUSE_LUNG_DC_DN                    | 154 | 0.48505 | 1.72684  | 0.000236 | 0.001307 | 0.000761 | 2327 |
| GSE29618_MONOCYTE_VS_MDC_DAY7_FLU_VACCINE_DN                      | 150 | 0.49088 | 1.735188 | 0.00024  | 0.001326 | 0.000772 | 2092 |
| GSE2706_2H_VS_8H_R848_STIM_DC_UP                                  | 155 | 0.48579 | 1.72836  | 0.000246 | 0.001359 | 0.000791 | 1403 |
| GSE40274_CTRL_VS_GATA1_TRANSDUCED_ACTIVATED_CD4_TCELL_UP          | 117 | 0.51464 | 1.775987 | 0.000248 | 0.001367 | 0.000796 | 1619 |
| GSE6269_HEALTHY_VS_FLU_INF_PBMC_DN                                | 125 | 0.4998  | 1.726101 | 0.000249 | 0.001371 | 0.000798 | 2088 |
| GSE37416_0H_VS_12H_F_TULARENSIS_LVS_NEUTROPHIL_DN                 | 151 | 0.48993 | 1.735568 | 0.00025  | 0.001374 | 0.0008   | 2381 |
| GSE6269_HEALTHY_VS_E_COLI_INF_PBMC_DN                             | 135 | 0.49788 | 1.740373 | 0.000251 | 0.001381 | 0.000804 | 1291 |
| GSE23505_IL6_IL1_IL23_VS_IL6_IL1_TGFB_TREATED_CD4_TCELL_UP        | 164 | 0.47632 | 1.702918 | 0.000253 | 0.001387 | 0.000807 | 2398 |
| GSE3982_BASOPHIL_VS_TH1_UP                                        | 153 | 0.48934 | 1.736386 | 0.000253 | 0.001387 | 0.000807 | 1562 |
| HALLMARK_HYPOXIA                                                  | 171 | 0.46546 | 1.678917 | 0.000254 | 0.00139  | 0.000809 | 1634 |
| GSE29618_MONOCYTE_VS_PDC_DAY7_FLU_VACCINE_DN                      | 155 | 0.48563 | 1.727812 | 0.000255 | 0.001394 | 0.000811 | 2216 |
| GSE17974_0H_VS_1H_IN_VITRO_ACT_CD4_TCELL_DN                       | 153 | 0.48927 | 1.736159 | 0.000256 | 0.001398 | 0.000814 | 3071 |
| GSE27859_MACROPHAGE_VS_CD11C_INT_F480_INT_DC_UP                   | 135 | 0.49717 | 1.737885 | 0.00026  | 0.00142  | 0.000826 | 2071 |
| GSE22886_IGG_IGA_MEMORY_BCELL_VS_BM_PLASMA_CELL_DN                | 165 | 0.47255 | 1.69258  | 0.000261 | 0.00142  | 0.000827 | 2598 |
| GSE24142_DN2_VS_DN3_THYMOCYTE_ADULT_UP                            | 165 | 0.47247 | 1.692272 | 0.000261 | 0.00142  | 0.000827 | 1160 |
| GSE37416_0H_VS_48H_F_TULARENSIS_LVS_NEUTROPHIL_UP                 | 148 | 0.49233 | 1.732625 | 0.000262 | 0.001425 | 0.00083  | 2310 |
| GSE29618_BCELL_VS_MONOCYTE_DAY7_FLU_VACCINE_UP                    | 151 | 0.48856 | 1.730712 | 0.000264 | 0.001435 | 0.000836 | 1595 |

|                                                                    |     |         |          |          |          |          |      |
|--------------------------------------------------------------------|-----|---------|----------|----------|----------|----------|------|
| GSE1925_CTRL_VS_24H_IFNG_STIM_IFNG_PRIMED_MACROPHAGE_DN            | 156 | 0.47797 | 1.701212 | 0.000265 | 0.001437 | 0.000836 | 1155 |
| GSE42088_UNINF_VS_LEISHMANIA_INF_DC_4H_UP                          | 168 | 0.47    | 1.69133  | 0.000269 | 0.001458 | 0.000849 | 1678 |
| GSE39152_BRAIN_VS_SPLEEN_CD103_NEG_MEMORY_CD8_TCELL_DN             | 166 | 0.47499 | 1.70471  | 0.000276 | 0.001494 | 0.00087  | 1949 |
| GSE29614_DAY3_VS_DAY7_TIV_FLU_VACCINE_PBMC_DN                      | 148 | 0.4915  | 1.729715 | 0.000277 | 0.001497 | 0.000871 | 2724 |
| GSE1925_CTRL_VS_IFNG_PRIMED_MACROPHAGE_24H_IFNG_STIM_DN            | 157 | 0.48681 | 1.73384  | 0.000287 | 0.001552 | 0.000903 | 1872 |
| GSE20715_WT_VS_TLR4_KO_24H_OZONE_LUNG_UP                           | 172 | 0.45552 | 1.64406  | 0.00029  | 0.001563 | 0.00091  | 1475 |
| GSE3691_CONVENTIONAL_VS_PLASMACYTOID_DC_SPLEEN_UP                  | 164 | 0.47335 | 1.692298 | 0.00029  | 0.001563 | 0.00091  | 1854 |
| GSE19198_6H_VS_24H_IL21_TREATED_TCELL_DN                           | 151 | 0.48722 | 1.725968 | 0.00029  | 0.001563 | 0.00091  | 1832 |
| GOLDRATH_NAIVE_VS_EFF_CD8_TCELL_DN                                 | 168 | 0.46858 | 1.68623  | 0.000291 | 0.001568 | 0.000913 | 2103 |
| GSE3982_MAST_CELL_VS_TH2_UP                                        | 167 | 0.46393 | 1.668539 | 0.000292 | 0.001568 | 0.000913 | 1595 |
| GSE3337_4H_VS_16H_IFNG_IN_CD8POS_DC_DN                             | 148 | 0.48995 | 1.724252 | 0.000303 | 0.001625 | 0.000946 | 1703 |
| GSE22432_PDC_VS_TGFB1_TREATEDCOMMON_DC_PROGENITOR_DN               | 163 | 0.46986 | 1.675605 | 0.000303 | 0.001625 | 0.000946 | 2565 |
| GSE16266_CTRL_VS_LPS_STIM_MEF_UP                                   | 155 | 0.48165 | 1.713637 | 0.000306 | 0.001638 | 0.000954 | 2491 |
| GSE37301_MULTIPOTENT_PROGENITOR_VS_CD4_TCELL_UP                    | 146 | 0.47964 | 1.693758 | 0.000306 | 0.001638 | 0.000954 | 1434 |
| GSE17974_0H_VS_24H_IN_VITRO_ACT_CD4_TCELL_UP                       | 137 | 0.497   | 1.734286 | 0.000313 | 0.001671 | 0.000973 | 1890 |
| GSE360_T_GONDII_VS_B_MALAYI_HIGH_DOSE_MAC_U                        | 158 | 0.47784 | 1.700509 | 0.000313 | 0.001671 | 0.000973 | 1248 |
| GSE1460_INTRATHYMIC_T_PROGENITOR_VS_NAIVE_CD4_TCELL_ADULT_BLOOD_DN | 157 | 0.4845  | 1.725609 | 0.000319 | 0.0017   | 0.00099  | 1759 |
| GSE29164_UNTREATED_VS_CD8_TCELL_TREATED_MELANOMA_DAY3_DN           | 164 | 0.47061 | 1.682472 | 0.000325 | 0.001727 | 0.001005 | 2428 |
| GSE40443_INDUCED_VS_TOTAL_TREG_UP                                  | 164 | 0.47098 | 1.683806 | 0.000325 | 0.001727 | 0.001005 | 1959 |
| GSE14769_UNSTIM_VS_20MIN_LPS_BMDM_DN                               | 156 | 0.47332 | 1.684672 | 0.000325 | 0.001727 | 0.001006 | 2672 |
| GSE19941_IL10_KO_VS_IL10_KO_AND_NFKBP50_KO_UNSTIM_MACROPHAGE_DN    | 147 | 0.48981 | 1.727718 | 0.00033  | 0.001752 | 0.00102  | 2017 |
| GSE36476_CTRL_VS_TSST_ACT_72H_MEMORY_CD4_TCELL_YOUNG_UP            | 161 | 0.47588 | 1.697684 | 0.00033  | 0.001752 | 0.00102  | 1917 |
| GSE13547_2H_VS_12_H_ANTI_IGM_STIM_ZFX_KO_BCELL_UP                  | 137 | 0.49628 | 1.731748 | 0.000331 | 0.001753 | 0.001021 | 3033 |

|                                                                |     |         |          |          |          |          |      |
|----------------------------------------------------------------|-----|---------|----------|----------|----------|----------|------|
| GSE22886_IGA_VS_IGM_MEMORY_BCELL_DN                            | 169 | 0.46035 | 1.654969 | 0.000338 | 0.001791 | 0.001043 | 1641 |
| GSE2197_IMMUNOSUPPRESSIVE_DNA_VS_UNTREATED_IN_DC_UP            | 172 | 0.45353 | 1.636902 | 0.000346 | 0.001829 | 0.001065 | 3084 |
| GSE13484_12H_VS_3H_YF17D_VACCINE_STIM_PBMC_D                   | 150 | 0.4856  | 1.716523 | 0.000348 | 0.001838 | 0.00107  | 1751 |
| GSE21670_STAT3_KO_VS_WT_CD4_TCELL_IL6_TREATD_DN                | 160 | 0.47534 | 1.697833 | 0.000352 | 0.001857 | 0.001081 | 2133 |
| GSE23925_DARK_ZONE_VS_NAIVE_BCELL_DN                           | 164 | 0.4701  | 1.680662 | 0.000353 | 0.001862 | 0.001084 | 2012 |
| GSE7460_CTRL_VS_TGFB_TREATED_ACT_TCONV_UP                      | 158 | 0.4767  | 1.696479 | 0.000359 | 0.00189  | 0.0011   | 2087 |
| GSE45365_HEALTHY_VS_MCMV_INFECTION_CD11B_DC_UP                 | 128 | -0.4016 | -1.65365 | 0.00036  | 0.001892 | 0.001101 | 2783 |
| GSE2770_IL12_ACT_VS_ACT_CD4_TCELL_2H_UP                        | 138 | 0.49026 | 1.715984 | 0.000369 | 0.00194  | 0.001129 | 3298 |
| GSE360_CTRL_VS_M_TUBERCULOSIS_MAC_DN                           | 159 | 0.47685 | 1.698537 | 0.000377 | 0.001977 | 0.001151 | 1283 |
| GSE12392_IFNAR_KO_VS_IFNB_KO_CD8_NEG_SPLEEN_DC_UP              | 162 | 0.47126 | 1.680406 | 0.000378 | 0.00198  | 0.001153 | 1933 |
| GSE22589_HEALTHY_VS_SIV_INFECTED_DC_DN                         | 154 | 0.4781  | 1.702115 | 0.000378 | 0.00198  | 0.001153 | 2226 |
| GSE22025_UNTREATED_VS_TGFB1_TREATED_CD4_TCELL_UP               | 171 | 0.4588  | 1.654914 | 0.000386 | 0.00202  | 0.001176 | 1914 |
| GSE25123_IL4_VS_IL4_AND_ROSIGLITAZONE_STIM_MACROPHAGE_DAY10_UP | 165 | 0.46652 | 1.670982 | 0.000387 | 0.00202  | 0.001176 | 2485 |
| GSE17721_CPG_VS_GARDIQUIMOD_8H_BMDC_UP                         | 158 | 0.47572 | 1.692977 | 0.000388 | 0.00202  | 0.001176 | 1613 |
| GSE7831_UNSTIM_VS_CPG_STIM_PDC_1H_DN                           | 161 | 0.47399 | 1.690954 | 0.000388 | 0.00202  | 0.001176 | 2416 |
| GSE25088_CTRL_VS_IL4_AND_ROSIGLITAZONE_STIM_MACROPHAGE_UP      | 146 | 0.47629 | 1.681948 | 0.000388 | 0.00202  | 0.001176 | 1330 |
| GSE17301_IFNA2_VS_IFNA2_AND_ACD3_ACD28_STIM_CD8_TCELL_DN       | 173 | 0.45596 | 1.648133 | 0.000389 | 0.002026 | 0.00118  | 1914 |
| GSE32533_MIR17_KO_VS_MIR17_OVEREXPRESS_ACT_CD4_TCELL_DN        | 155 | 0.4773  | 1.698182 | 0.000392 | 0.002036 | 0.001185 | 2232 |
| GSE37416_12H_VS_48H_F_TULARENSIS_LVS_NEUTROPHIL_UP             | 160 | 0.4741  | 1.693412 | 0.000392 | 0.002036 | 0.001185 | 2423 |
| GSE17974_CTRL_VS_ACT_IL4_AND_ANTI_IL12_24H_CD4_TCELL_UP        | 146 | 0.4758  | 1.680202 | 0.000394 | 0.002042 | 0.001189 | 2463 |
| GSE7460_CTRL_VS_TGFB_TREATED_ACT_TCONV_DN                      | 162 | 0.46979 | 1.675149 | 0.000401 | 0.002075 | 0.001208 | 1329 |
| GSE28726_NAIVE_VS_ACTIVATED_NKTCELL_DN                         | 166 | 0.46958 | 1.685293 | 0.000401 | 0.002075 | 0.001208 | 2913 |
| GSE13547_WT_VS_ZFX_KO_BCELL_UP                                 | 135 | 0.49139 | 1.717678 | 0.000405 | 0.00209  | 0.001216 | 2432 |

|                                                                        |     |         |          |          |          |          |      |
|------------------------------------------------------------------------|-----|---------|----------|----------|----------|----------|------|
| GSE21546_ELK1_KO_VS_SAP1A_KO_AND_ELK1_KO_DP_THYMOCYTES_UP              | 138 | 0.48839 | 1.70944  | 0.000405 | 0.00209  | 0.001216 | 2779 |
| GSE37416_CTRL_VS_12H_F_TULARENSIS_LVS_NEUTROPHIL_UP                    | 161 | 0.47333 | 1.688587 | 0.000405 | 0.00209  | 0.001216 | 2386 |
| GSE18893_TCONV_VS_TREG_2H_CULTURE_DN                                   | 162 | 0.46913 | 1.672817 | 0.000407 | 0.002095 | 0.00122  | 2395 |
| GSE11864_UNTREATED_VS_CSF1_IFNG_PAM3CYS_IN_MAC_DN                      | 156 | 0.46944 | 1.670857 | 0.000417 | 0.002147 | 0.00125  | 2238 |
| GSE26488_WT_VS_HDAC7_DELTAP_TG_OT2_THYMOCYTE_WITH_PEPTIDE_INJECTION_DN | 173 | 0.45502 | 1.644751 | 0.000417 | 0.002147 | 0.00125  | 2476 |
| GSE21774_CD62L_POS_CD56_DIM_VS_CD62L_NEG_CD56_DIM_NK_CELL_DN           | 160 | 0.47134 | 1.683536 | 0.000421 | 0.002159 | 0.001257 | 1833 |
| GSE46242_CTRL_VS_EGR2_DELETED_ANERGIC_TH1_CD4_TCELL_DN                 | 151 | 0.4823  | 1.708525 | 0.000421 | 0.002159 | 0.001257 | 1774 |
| GSE22886_NAIVE_BCELL_VS_BM_PLASMA_CELL_UP                              | 153 | 0.48068 | 1.705666 | 0.000428 | 0.002192 | 0.001276 | 2149 |
| GSE43955_1H_VS_60H_ACT_CD4_TCELL_DN                                    | 157 | 0.48135 | 1.71441  | 0.000428 | 0.002192 | 0.001276 | 1987 |
| GSE7852_THYMUS_VS_FAT_TREG_DN                                          | 148 | 0.48563 | 1.709052 | 0.000438 | 0.002244 | 0.001306 | 2226 |
| GSE24634_IL4_VS_CTRL_TREATED_NAIVE_CD4_TCELL_DAY3_UP                   | 164 | 0.46757 | 1.671618 | 0.000439 | 0.002244 | 0.001306 | 1572 |
| GSE28130_ACTIVATED_VS_INDUCED_TREG_UP                                  | 164 | 0.46766 | 1.671953 | 0.000439 | 0.002244 | 0.001306 | 1820 |
| GSE21063_CTRL_VS_ANTI_IGM_STIM_BCELL_NFATC1_KO_16H_UP                  | 162 | 0.46851 | 1.670608 | 0.000441 | 0.00225  | 0.00131  | 1993 |
| GSE13411_SWITCHED_MEMORY_BCELL_VS_PLASMA_CELL_DN                       | 157 | 0.48086 | 1.712643 | 0.000445 | 0.002269 | 0.001321 | 1280 |
| GSE27786_CD4_VS_CD8_TCELL_UP                                           | 155 | 0.47532 | 1.691116 | 0.000449 | 0.002285 | 0.00133  | 2824 |
| GSE10147_IL3_VS_IL3_AND_CPG_STIM_PDC_UP                                | 106 | 0.51274 | 1.752309 | 0.00045  | 0.002285 | 0.00133  | 2302 |
| GSE19888_CTRL_VS_A3R_INHIBITOR_TREATED_MAST_CELL_DN                    | 151 | 0.48098 | 1.703856 | 0.00045  | 0.002285 | 0.00133  | 2108 |
| GSE16385_IFNG_TNF_VS_UNSTIM_MACROPHAGE_ROSI_GLITAZONE_TREATED_DN       | 156 | 0.46754 | 1.664103 | 0.000452 | 0.002289 | 0.001332 | 2460 |
| GSE3982_MAST_CELL_VS_NEUTROPHIL_DN                                     | 156 | 0.46756 | 1.664184 | 0.000452 | 0.002289 | 0.001332 | 2143 |
| GSE11864_CSF1_PAM3CYS_VS_CSF1_IFNG_PAM3CYS_IN_MAC_UP                   | 146 | 0.47312 | 1.67074  | 0.000452 | 0.002289 | 0.001333 | 1593 |
| GSE43955_1H_VS_10H_ACT_CD4_TCELL_WITH_TGFB_IL6_UP                      | 162 | 0.46794 | 1.668569 | 0.000453 | 0.00229  | 0.001333 | 2009 |
| GSE17721_CTRL_VS_LPS_6H_BMDC_DN                                        | 163 | 0.46588 | 1.661437 | 0.000453 | 0.002291 | 0.001333 | 1986 |

|                                                                              |     |         |          |          |          |          |      |
|------------------------------------------------------------------------------|-----|---------|----------|----------|----------|----------|------|
| GSE30971_WBP7_HET_VS_KO_MACROPHAGE_4H_LPS_S<br>TIM_DN                        | 158 | 0.47378 | 1.686065 | 0.000457 | 0.002306 | 0.001342 | 2608 |
| GSE3982_EFF_MEMORY_CD4_TCELL_VS_NKCELL_DN                                    | 159 | 0.47469 | 1.690844 | 0.000463 | 0.002333 | 0.001358 | 1876 |
| GSE14769_20MIN_VS_360MIN_LPS_BMDM_DN                                         | 154 | 0.47425 | 1.688406 | 0.000464 | 0.002333 | 0.001358 | 1790 |
| GSE36888_STAT5_AB_KNOCKIN_VS_WT_TCELL_IL2_TR<br>EATED_6H_UP                  | 154 | 0.47403 | 1.687615 | 0.000464 | 0.002333 | 0.001358 | 2242 |
| GSE7852_TREG_VS_TCONV_DN                                                     | 154 | 0.47372 | 1.686524 | 0.000469 | 0.002359 | 0.001373 | 1930 |
| GSE40666_NAIVE_VS_EFFECTOR_CD8_TCELL_DN                                      | 156 | 0.4662  | 1.659328 | 0.000475 | 0.002383 | 0.001387 | 2384 |
| GSE30971_2H_VS_4H_LPS_STIM_MACROPHAGE_WBP7_<br>HET_DN                        | 125 | 0.48788 | 1.684924 | 0.000476 | 0.002389 | 0.001391 | 2288 |
| GSE21033_CTRL_VS_POLYIC_STIM_DC_24H_UP                                       | 123 | 0.50193 | 1.736897 | 0.000477 | 0.002392 | 0.001392 | 2072 |
| GSE360_CTRL_VS_T_GONDII_DC_DN                                                | 152 | 0.48419 | 1.715821 | 0.000483 | 0.002417 | 0.001407 | 2475 |
| GSE24726_WT_VS_E2_2_KO_PDC_DAY4_POST_DELETIO<br>N_UP                         | 168 | 0.4629  | 1.665775 | 0.000484 | 0.002419 | 0.001408 | 1785 |
| GSE40274_CTRL_VS_FOXP3_AND_PBX1_TRANSDUCE<br>D_ACTIVATED_CD4_TCELL_UP        | 131 | 0.49521 | 1.726541 | 0.000484 | 0.002419 | 0.001408 | 2460 |
| GSE36476_CTRL_VS_TSST_ACT_16H_MEMORY_CD4_TC<br>ELL_YOUNG_DN                  | 161 | 0.47142 | 1.681768 | 0.000485 | 0.002423 | 0.001411 | 1739 |
| GSE37416_0H_VS_3H_F_TULARENSIS_LVS_NEUTROPHIL<br>_DN                         | 154 | 0.47305 | 1.684132 | 0.000486 | 0.002425 | 0.001412 | 2405 |
| GSE17974_CTRL_VS_ACT_IL4_AND_ANTI_IL12_1H_CD4_<br>TCELL_DN                   | 141 | 0.4898  | 1.722851 | 0.000499 | 0.002488 | 0.001448 | 2927 |
| GSE17721_0.5H_VS_4H_LPS_BMDC_DN                                              | 163 | 0.46427 | 1.655671 | 0.000505 | 0.002514 | 0.001464 | 1468 |
| GSE17721_LPS_VS_POLYIC_24H_BMDC_DN                                           | 167 | 0.45678 | 1.642838 | 0.000507 | 0.002521 | 0.001468 | 2149 |
| GSE27241_WT_VS_RORGT_KO_TH17_POLARIZED_CD4_T<br>CELL_TREATED_WITH_DIGOXIN_DN | 139 | 0.48771 | 1.709928 | 0.000525 | 0.002608 | 0.001518 | 2060 |
| GSE22886_TCELL_VS_BCELL_NAIVE_DN                                             | 158 | 0.47139 | 1.677568 | 0.000526 | 0.002608 | 0.001518 | 2104 |
| GSE43955_TH0_VS_TGFB_IL6_TH17_ACT_CD4_TCELL_10<br>H_UP                       | 164 | 0.46403 | 1.658957 | 0.000531 | 0.002634 | 0.001533 | 2060 |
| GSE32034_LY6C_HIGH_VS_LOW_ROSIGLIZATONE_TREA<br>TED_MONOCYTE_UP              | 163 | 0.46371 | 1.653706 | 0.000534 | 0.002645 | 0.00154  | 1997 |
| GSE17974_1.5H_VS_72H_IL4_AND_ANTI_IL12_ACT_CD4_<br>TCELL_DN                  | 160 | -0.3685 | -1.57118 | 0.000537 | 0.002657 | 0.001547 | 2399 |
| GSE21063_CTRL_VS_ANTI_IGM_STIM_BCELL_NFATC1_<br>KO_3H_UP                     | 163 | 0.46305 | 1.651346 | 0.000546 | 0.002696 | 0.001569 | 1676 |

|                                                                              |     |         |          |          |          |          |      |
|------------------------------------------------------------------------------|-----|---------|----------|----------|----------|----------|------|
| GSE22886_CD4_TCELL_VS_BCELL_NAIVE_DN                                         | 147 | 0.48273 | 1.702762 | 0.000546 | 0.002696 | 0.001569 | 1583 |
| GSE9509_LPS_VS_LPS_AND_IL10_STIM_IL10_KO_MACR<br>OPHAGE_30MIN_UP             | 156 | 0.46418 | 1.652131 | 0.000549 | 0.002709 | 0.001577 | 1393 |
| GSE6674_PL2_3_VS_ANTI_IGM_AND_CPG_STIM_BCELL_<br>DN                          | 162 | 0.46586 | 1.66116  | 0.000551 | 0.002713 | 0.00158  | 2883 |
| GSE36392_EOSINOPHIL_VS_NEUTROPHIL_IL25_TREATE<br>D_LUNG_UP                   | 163 | 0.46262 | 1.649814 | 0.000551 | 0.002714 | 0.00158  | 2301 |
| GSE17721_PAM3CSK4_VS_CPG_24H_BMDC_DN                                         | 162 | 0.46584 | 1.661066 | 0.000556 | 0.002736 | 0.001593 | 2450 |
| GSE21063_CTRL_VS_ANTI_IGM_STIM_BCELL_8H_UP                                   | 123 | 0.49866 | 1.725588 | 0.000561 | 0.002757 | 0.001605 | 1815 |
| GSE22103_UNSTIM_VS_LPS_STIM_NEUTROPHIL_UP                                    | 157 | 0.47664 | 1.697639 | 0.000572 | 0.002805 | 0.001633 | 2471 |
| GSE26669_CD4_VS_CD8_TCELL_IN_MLR_UP                                          | 162 | 0.46517 | 1.65869  | 0.000574 | 0.00281  | 0.001636 | 2186 |
| GSE3994_WT_VS_PAC1_KO_ACTIVATED_MAST_CELL_D<br>N                             | 162 | 0.46564 | 1.660356 | 0.000574 | 0.00281  | 0.001636 | 2073 |
| GSE36888_UNTREATED_VS_IL2_TREATED_TCELL_17H_<br>UP                           | 162 | 0.46506 | 1.658286 | 0.00058  | 0.002836 | 0.001651 | 1728 |
| GSE22601_DOUBLE_NEGATIVE_VS_CD4_SINGLE_POSITI<br>VE_THYMOCYTE_DN             | 164 | 0.46314 | 1.655796 | 0.000583 | 0.002844 | 0.001656 | 2595 |
| GSE24142_EARLY_THYMIC_PROGENITOR_VS_DN2_THY<br>MOCYTE_ADULT_DN               | 158 | 0.46991 | 1.672319 | 0.000583 | 0.002844 | 0.001656 | 1721 |
| GSE34515_CD16_POS_MONOCYTE_VS_DC_DN                                          | 157 | 0.47598 | 1.695276 | 0.000583 | 0.002844 | 0.001656 | 1383 |
| GSE5679_PPARG_LIGAND_ROSIGLITAZONE_VS_RARA_<br>AGONIST_AM580_TREATED_DC_UP   | 166 | -0.3613 | -1.55209 | 0.000584 | 0.002848 | 0.001658 | 2338 |
| GSE21546_UNSTIM_VS_ANTI_CD3_STIM_SAP1A_KO_AN<br>D_ELK1_KO_DP_THYMOCYTES_UP   | 125 | 0.48383 | 1.670925 | 0.000585 | 0.00285  | 0.001659 | 1716 |
| GSE7348_UNSTIM_VS_TOLERIZED_AND_LPS_STIM_MA<br>CROPHAGE_DN                   | 138 | 0.48178 | 1.686309 | 0.000594 | 0.002888 | 0.001681 | 1869 |
| GSE46606_UNSTIM_VS_CD40L_IL2_IL5_1DAY_STIMULA<br>TED_IRF4MID_SORTED_BCELL_UP | 153 | 0.47546 | 1.687152 | 0.000595 | 0.002889 | 0.001682 | 1911 |
| GSE34205_HEALTHY_VS_RSV_INF_INFANT_PBMC_UP                                   | 137 | 0.4838  | 1.688195 | 0.000605 | 0.002938 | 0.00171  | 1694 |
| GSE3982_EFF_MEMORY_VS_CENT_MEMORY_CD4_TCEL<br>L_UP                           | 155 | 0.47118 | 1.676399 | 0.000615 | 0.002984 | 0.001737 | 1286 |
| GSE28737_FOLLICULAR_VS_MARGINAL_ZONE_BCELL_<br>BCL6_HET_DN                   | 153 | 0.47444 | 1.683525 | 0.000618 | 0.00299  | 0.00174  | 1449 |
| GSE45365_NK_CELL_VS_CD8A_DC_UP                                               | 158 | 0.46907 | 1.669323 | 0.000618 | 0.00299  | 0.00174  | 2288 |

|                                                                           |     |         |          |          |          |          |      |
|---------------------------------------------------------------------------|-----|---------|----------|----------|----------|----------|------|
| GSE11864_CSF1_IFNG_VS_CSF1_IFNG_PAM3CYS_IN_MA<br>C_DN                     | 145 | 0.47329 | 1.667047 | 0.000629 | 0.00304  | 0.00177  | 2109 |
| GSE3039_CD4_TCELL_VS_ALPHAALPHA_CD8_TCELL_U                               | 156 | 0.46162 | 1.643021 | 0.00063  | 0.003043 | 0.001772 | 2504 |
| GSE3720_LPS_VS_PMA_STIM_VD1_GAMMADelta_TCE<br>LL_UP                       | 115 | 0.50424 | 1.734994 | 0.000632 | 0.003048 | 0.001774 | 1705 |
| GSE5589_LPS_AND_IL10_VS_LPS_AND_IL6_STIM_MACR<br>OPHAGE_45MIN_DN          | 165 | 0.45963 | 1.6463   | 0.000639 | 0.003081 | 0.001794 | 1705 |
| GSE16450_IMMATURE_VS_MATURE_NEURON_CELL_LI<br>NE_UP                       | 141 | 0.48551 | 1.707766 | 0.00064  | 0.003081 | 0.001794 | 2030 |
| GSE40274_CTRL_VS_FOXP3_AND_EOS_TRANSDUCE<br>D_ACTIVATED_CD4_TCELL_UP      | 133 | 0.49083 | 1.718821 | 0.000644 | 0.003098 | 0.001803 | 2507 |
| GSE17721_LPS_VS_CPG_IH_BMDC_DN                                            | 159 | 0.47017 | 1.674764 | 0.000653 | 0.00314  | 0.001828 | 2661 |
| GSE44732_UNSTIM_VS_IL27_STIM_IMATURE_DC_DN                                | 163 | 0.46024 | 1.641312 | 0.000656 | 0.003149 | 0.001833 | 2216 |
| GSE40666_UNTREATED_VS_IFNA_STIM_STAT1_KO_CD8<br>_TCELL_90MIN_DN           | 161 | 0.46493 | 1.658606 | 0.000664 | 0.003185 | 0.001854 | 1777 |
| KAECH_DAY8_EFF_VS_DAY15_EFF_CD8_TCELL_DN                                  | 152 | 0.4784  | 1.695311 | 0.000668 | 0.003202 | 0.001864 | 1721 |
| HALLMARK_FATTY_ACID_METABOLISM                                            | 136 | -0.3817 | -1.58827 | 0.000679 | 0.00325  | 0.001892 | 2439 |
| GSE2585_CTEC_VS_MTEC_THYMUS_UP                                            | 152 | 0.47803 | 1.693978 | 0.00068  | 0.003251 | 0.001893 | 1593 |
| GSE7768_OVA_ALONE_VS_OVA_WITH_MPL_IMMUNIZ<br>E_D_MOUSE_WHOLE_SPLEEN_6H_DN | 135 | 0.48441 | 1.693276 | 0.000683 | 0.003263 | 0.0019   | 2536 |
| GSE1460_INTRATHYMIC_T_PROGENITOR_VS_DP_THYM<br>OCYTE_UP                   | 164 | 0.46138 | 1.649492 | 0.000687 | 0.00328  | 0.001909 | 1307 |
| GSE23568_CTRL_TRANSDUCE<br>D_VS_WT_CD8_TCELL_DN                           | 159 | 0.46912 | 1.671023 | 0.000688 | 0.003281 | 0.00191  | 2455 |
| GSE40274_CTRL_VS_EOS_TRANSDUCE<br>D_ACTIVATED_CD4_TCELL_UP                | 135 | 0.48314 | 1.688841 | 0.000695 | 0.00331  | 0.001927 | 2183 |
| GSE6674_ANTI_IGM_VS_CPG_STIM_BCELL_DN                                     | 165 | 0.4588  | 1.643315 | 0.000697 | 0.003317 | 0.001931 | 2219 |
| GSE16451_CTRL_VS_WEST_EQUINE_ENC_VIRUS_MATU<br>RE_NEURON_CELL_LINE_DN     | 161 | 0.46427 | 1.656255 | 0.000699 | 0.003319 | 0.001932 | 1775 |
| GSE25088_IL4_VS_IL4_AND_ROSIGLITAZONE_STIM_MA<br>CROPHAGE_DAY10_DN        | 153 | 0.4724  | 1.676298 | 0.000699 | 0.003319 | 0.001932 | 2162 |
| GSE3982_DC_VS_MAC_LPS_STIM_DN                                             | 165 | 0.45859 | 1.642569 | 0.000708 | 0.003362 | 0.001957 | 2020 |
| GSE45739_UNSTIM_VS_ACD3_ACD28_STIM_WT_CD4_TC<br>CELL_UP                   | 149 | 0.47433 | 1.676689 | 0.000709 | 0.003363 | 0.001958 | 1929 |
| GSE30083_SP2_VS_SP3_THYMOCYTE_UP                                          | 159 | 0.46882 | 1.669944 | 0.000711 | 0.003368 | 0.001961 | 1715 |

|                                                                          |     |         |          |          |          |          |      |
|--------------------------------------------------------------------------|-----|---------|----------|----------|----------|----------|------|
| GSE40274_FOXP3_VS_FOXP3_AND_LEF1_TRANSDUCE<br>D_ACTIVATED_CD4_TCELL_UP   | 167 | 0.45153 | 1.623951 | 0.000712 | 0.003369 | 0.001961 | 2171 |
| GSE17721_PAM3CSK4_VS_CPG_2H_BMDC_DN                                      | 162 | 0.46176 | 1.646523 | 0.000713 | 0.00337  | 0.001962 | 1142 |
| GSE5589_WT_VS_IL10_KO_LPS_STIM_MACROPHAGE_45<br>MIN_UP                   | 155 | 0.4674  | 1.662936 | 0.00073  | 0.00345  | 0.002009 | 1586 |
| GSE36527_CD62L_HIGH_CD69_NEG_VS_CD62L_LOW_CD<br>69_POS_TREG_KLRG1_NEG_DN | 161 | 0.46399 | 1.655278 | 0.000733 | 0.00346  | 0.002014 | 2359 |
| GSE32533_WT_VS_MIR17_OVEREXPRESS_ACT_CD4_TCE<br>LL_DN                    | 161 | -0.3587 | -1.5353  | 0.000737 | 0.003472 | 0.002021 | 2518 |
| GSE18893_TCONV_VS_TREG_24H_CULTURE_DN                                    | 157 | 0.47065 | 1.676307 | 0.000745 | 0.003502 | 0.002039 | 2092 |
| GSE40274_FOXP3_VS_FOXP3_AND_IRF4_TRANSDUCE<br>D_ACTIVATED_CD4_TCELL_UP   | 158 | 0.46461 | 1.653446 | 0.000745 | 0.003502 | 0.002039 | 2667 |
| GSE17721_0.5H_VS_4H_POLYIC_BMDC_DN                                       | 168 | 0.45633 | 1.642154 | 0.000745 | 0.003502 | 0.002039 | 3105 |
| GSE39820_CTRL_VS_IL1B_IL6_IL23A_CD4_TCELL_UP                             | 159 | 0.46834 | 1.668241 | 0.000746 | 0.003502 | 0.002039 | 1102 |
| GSE32901_NAIVE_VS_TH17_ENRICHED_CD4_TCELL_UP                             | 116 | 0.49496 | 1.709449 | 0.000758 | 0.003557 | 0.00207  | 2163 |
| GSE41867_DAY6_VS_DAY8_LCMV_ARMSTRONG_EFFEC<br>TOR_CD8_TCELL_UP           | 163 | 0.45868 | 1.635737 | 0.00076  | 0.003557 | 0.00207  | 2269 |
| GSE1925_CTRL_VS_3H_IFNG_STIM_MACROPHAGE_DN                               | 154 | 0.4656  | 1.657602 | 0.00076  | 0.003557 | 0.00207  | 1244 |
| GSE557_CIIITA_KO_VS_I_AB_KO_DC_UP                                        | 154 | 0.4655  | 1.657263 | 0.00076  | 0.003557 | 0.00207  | 2103 |
| GSE14415_NATURAL_TREG_VS_TCONV_UP                                        | 118 | 0.49339 | 1.706179 | 0.000761 | 0.003557 | 0.002071 | 1895 |
| GSE17974_CTRL_VS_ACT_IL4_AND_ANTI_IL12_72H_CD4<br>_TCELL_UP              | 148 | 0.47761 | 1.680831 | 0.000763 | 0.003563 | 0.002074 | 2012 |
| GSE42724_MEMORY_BCELL_VS_PLASMABLAST_UP                                  | 169 | 0.45043 | 1.61933  | 0.000772 | 0.0036   | 0.002096 | 2485 |
| GSE339_CD4POS_VS_CD8POS_DC_UP                                            | 158 | 0.46355 | 1.649678 | 0.000779 | 0.00363  | 0.002113 | 1935 |
| GSE45382_UNTREATED_VS_TGFB_TREATED_MACROPH<br>AGES_DN                    | 149 | 0.47354 | 1.673919 | 0.00078  | 0.00363  | 0.002113 | 2730 |
| GSE36888_STAT5_AB_KNOCKIN_VS_WT_TCELL_IL2_TR<br>EATED_2H_DN              | 160 | 0.46289 | 1.653353 | 0.000788 | 0.003666 | 0.002134 | 2625 |
| GSE3982_MAST_CELL_VS_CENT_MEMORY_CD4_TCELL<br>_UP                        | 165 | 0.4567  | 1.635779 | 0.000789 | 0.003667 | 0.002135 | 1957 |
| GSE27859_MACROPHAGE_VS_CD11C_INT_F480_HI_MAC<br>ROPHAGE_UP               | 143 | 0.47865 | 1.685139 | 0.000792 | 0.003679 | 0.002142 | 2287 |
| GSE15330_HSC_VS_MEGAKARYOCYTE_ERYTHROID_PR<br>OGENITOR_IKAROS_KO_DN      | 154 | 0.46437 | 1.653217 | 0.000817 | 0.003792 | 0.002207 | 1578 |

|                                                                     |     |         |          |          |          |          |      |
|---------------------------------------------------------------------|-----|---------|----------|----------|----------|----------|------|
| GSE22025_UNTREATED_VS_PROGESTERONE_TREATED_CD4_TCELL_DN             | 165 | 0.45532 | 1.630858 | 0.000824 | 0.003817 | 0.002222 | 1914 |
| GSE2706_LPS_VS_R848_AND_LPS_8H_STIM_DC_DN                           | 138 | 0.47526 | 1.663487 | 0.000825 | 0.003819 | 0.002223 | 2386 |
| GSE40666_NAIVE_VS_EFFECTOR_CD8_TCELL_WITH_IFN_A_STIM_90MIN_DN       | 164 | 0.4593  | 1.642062 | 0.000826 | 0.003819 | 0.002223 | 1775 |
| HALLMARK_KRAS_SIGNALING_DN                                          | 181 | -0.34   | -1.46867 | 0.000827 | 0.003821 | 0.002224 | 1894 |
| GSE3920_UNTREATED_VS_IFNG_TREATED_FIBROBLAST_DN                     | 143 | 0.47712 | 1.67973  | 0.000828 | 0.003821 | 0.002224 | 2073 |
| GSE26030_TH1_VS_TH17_DAY15_POST_POLARIZATION_UP                     | 166 | 0.45853 | 1.645619 | 0.000829 | 0.003823 | 0.002226 | 2416 |
| GSE17721_CTRL_VS_LPS_12H_BMDC_DN                                    | 152 | 0.47438 | 1.681042 | 0.000831 | 0.003829 | 0.002229 | 2614 |
| GSE45739_NRAS_KO_VS_WT_UNSTIM_CD4_TCELL_UP                          | 167 | 0.44911 | 1.615264 | 0.000837 | 0.003854 | 0.002244 | 2848 |
| GSE18281_SUBCAPSULAR_VS_PERIMEDULLARY_CORTICAL_REGION_OF_THYMUS_DN  | 159 | 0.46687 | 1.662989 | 0.000838 | 0.003856 | 0.002245 | 1826 |
| GSE32034_UNTREATED_VS_ROSIGLIZATONE_TREATED_LY6C_HIGH_MONOCYTE_UP   | 166 | 0.45839 | 1.645109 | 0.00084  | 0.003861 | 0.002248 | 942  |
| GSE17721_LPS_VS_GARDIQUIMOD_4H_BMDC_UP                              | 158 | 0.46238 | 1.645505 | 0.000849 | 0.003891 | 0.002265 | 2548 |
| GSE33424_CD161_HIGH_VS_NEG_CD8_TCELL_DN                             | 164 | 0.45884 | 1.640397 | 0.000849 | 0.003891 | 0.002265 | 2075 |
| GSE3982_DC_VS_TH1_DN                                                | 159 | 0.46664 | 1.662175 | 0.00085  | 0.003891 | 0.002265 | 2509 |
| GSE8621_LPS_STIM_VS_LPS_PRIMED_AND_LPS_STIM_MACROPHAGE_DN           | 156 | 0.45577 | 1.622224 | 0.00085  | 0.003891 | 0.002265 | 2069 |
| GSE20715_0H_VS_48H_OZONE_TLR4_KO_LUNG_DN                            | 170 | 0.44868 | 1.612783 | 0.000851 | 0.003891 | 0.002265 | 2070 |
| GSE22886_CD8_TCELL_VS_BCELL_NAIVE_DN                                | 154 | 0.46381 | 1.651227 | 0.000852 | 0.003892 | 0.002266 | 1429 |
| GSE3982_EOSINOPHIL_VS_BCELL_UP                                      | 168 | 0.45445 | 1.635394 | 0.000859 | 0.003921 | 0.002283 | 1696 |
| GSE6681_DELETED_FOXP3_VS_WT_TREG_UP                                 | 150 | 0.47201 | 1.668478 | 0.000864 | 0.003941 | 0.002294 | 1530 |
| GSE28408_LY6G_POS_VS_NEG_DC_DN                                      | 163 | 0.45666 | 1.628533 | 0.000876 | 0.003993 | 0.002325 | 2019 |
| GSE29618_MONOCYTE_VS_PDC_DN                                         | 155 | 0.46341 | 1.648748 | 0.00088  | 0.004007 | 0.002332 | 2046 |
| GSE17721_LPS_VS_PAM3CSK4_1H_BMDC_DN                                 | 164 | 0.45783 | 1.636809 | 0.000883 | 0.004018 | 0.002339 | 1762 |
| GSE17721_CPG_VS_GARDIQUIMOD_4H_BMDC_UP                              | 164 | 0.45682 | 1.633197 | 0.000895 | 0.004063 | 0.002365 | 2824 |
| GSE5679_RARA_AGONIST_AM580_VS_AM580_AND_ROSIGLITAZONE_TREATED_DC_DN | 164 | 0.45702 | 1.633917 | 0.000895 | 0.004063 | 0.002365 | 1867 |
| GSE3982_MAST_CELL_VS_MAC_DN                                         | 163 | 0.45602 | 1.626276 | 0.000923 | 0.004182 | 0.002434 | 1784 |
| GSE9988_ANTI_TREM1_VS_LOW_LPS_MONOCYTE_UP                           | 150 | 0.4706  | 1.66349  | 0.000923 | 0.004182 | 0.002434 | 2548 |
| GSE3982_MEMORY_CD4_TCELL_VS_TH2_UP                                  | 152 | 0.47311 | 1.676538 | 0.000924 | 0.004183 | 0.002435 | 1198 |
| GSE40443_INDUCED_VS_TOTAL_TREG_DN                                   | 155 | 0.46291 | 1.646971 | 0.000926 | 0.004189 | 0.002439 | 2596 |

|                                                                                                    |     |         |          |          |          |          |      |
|----------------------------------------------------------------------------------------------------|-----|---------|----------|----------|----------|----------|------|
| GSE22432_MULTIPOTENT_PROGENITOR_VS_CDC_UP                                                          | 148 | 0.47551 | 1.673448 | 0.000929 | 0.004197 | 0.002443 | 2226 |
| GSE27786_CD4_TCELL_VS_NKCELL_DN                                                                    | 161 | 0.46075 | 1.64369  | 0.00093  | 0.004197 | 0.002443 | 2188 |
| GSE6674_UNSTIM_VS_CPG_STIM_BCELL_UP                                                                | 120 | 0.49205 | 1.701353 | 0.000931 | 0.004201 | 0.002446 | 1551 |
| GSE13547_WT_VS_ZFX_KO_BCELL_DN                                                                     | 147 | 0.47248 | 1.666591 | 0.000933 | 0.004206 | 0.002449 | 1145 |
| GSE17721_0.5H_VS_8H_LPS_BMDC_DN                                                                    | 163 | 0.45595 | 1.626021 | 0.000934 | 0.004207 | 0.002449 | 2422 |
| GSE42021_CD24INT_VS_CD24LOW_TCONV_THYMUS_D                                                         | 164 | 0.45591 | 1.629931 | 0.000941 | 0.004234 | 0.002465 | 2398 |
| GSE17721_CTRL_VS_PAM3CSK4_6H_BMDC_DN                                                               | 156 | 0.45306 | 1.612562 | 0.000942 | 0.004235 | 0.002466 | 1953 |
| GSE22886_NAIVE_VS_MEMORY_TCELL_DN                                                                  | 169 | 0.44719 | 1.607684 | 0.000943 | 0.004235 | 0.002466 | 1366 |
| GSE25085_FETAL_LIVER_VS_ADULT_BM_SP4_THYMIC_IMPLANT_DN                                             | 156 | -0.3596 | -1.52418 | 0.00095  | 0.004263 | 0.002482 | 3475 |
| GSE45365_CD8A_DC_VS_CD11B_DC_IFNAR_KO_MCMV_INFECTION_DN                                            | 125 | 0.47489 | 1.640061 | 0.000969 | 0.004345 | 0.002529 | 1939 |
| GSE9509_10MIN_VS_30MIN_LPS_AND_IL10_STIM_IL10_KO_MACROPHAGE_DN                                     | 136 | 0.47455 | 1.660577 | 0.000978 | 0.004382 | 0.002551 | 1751 |
| GSE17721_CTRL_VS_GARDIQUIMOD_4H_BMDC_DN                                                            | 171 | 0.44127 | 1.591693 | 0.00098  | 0.004386 | 0.002553 | 2406 |
| GSE17721_0.5H_VS_12H_GARDIQUIMOD_BMDC_DN                                                           | 153 | 0.46535 | 1.651257 | 0.000987 | 0.004413 | 0.002569 | 2570 |
| GSE360_CTRL_VS_B_MALAYI_HIGH_DOSE_MAC_DN                                                           | 156 | 0.45186 | 1.608291 | 0.000988 | 0.004415 | 0.00257  | 1380 |
| GSE19888_ADENOSINE_A3R_ACT_VS_A3R_ACT_WITH_A3R_INH_PRETREATMENT_IN_MAST_CELL_DN                    | 152 | 0.4713  | 1.670149 | 0.000993 | 0.004433 | 0.002581 | 1579 |
| GSE22025_PROGESTERONE_VS_TGFB1_AND_PROGESTERONE_TREATED_CD4_TCELL_UP                               | 165 | 0.45108 | 1.61566  | 0.001019 | 0.004544 | 0.002645 | 2878 |
| GSE25677_MPL_VS_R848_STIM_BCELL_UP                                                                 | 151 | 0.46789 | 1.657494 | 0.001021 | 0.004546 | 0.002646 | 2385 |
| GSE6259_CD4_TCELL_VS_CD8_TCELL_UP                                                                  | 158 | 0.46032 | 1.638168 | 0.001022 | 0.004548 | 0.002647 | 2281 |
| GSE29949_CD8_NEG_DC_SPLEEN_VS_MONOCYTE_BONE_MARROW_DN                                              | 157 | 0.46611 | 1.660113 | 0.001033 | 0.004595 | 0.002675 | 2484 |
| GSE32034_UNTREATED_VS_ROSIGLIZATONE_TREATED_LY6C_LOW_MONOCYTE_UP                                   | 119 | 0.48364 | 1.66964  | 0.001041 | 0.004623 | 0.002691 | 2278 |
| GSE360_L_MAJOR_VS_M_TUBERCULOSIS_DC_DN                                                             | 157 | 0.46554 | 1.658086 | 0.001045 | 0.004638 | 0.0027   | 1574 |
| GSE19888_ADENOSINE_A3R_INH_PRETREAT_AND_ACT_BY_A3R_VS_A3R_INH_AND_TCELL_MEMBRANES_ACT_MAST_CELL_UP | 153 | 0.46466 | 1.648838 | 0.001057 | 0.004685 | 0.002727 | 2416 |
| GSE37301_COMMON_LYMPHOID_PROGENITOR_VS_RAG2_KO_NK_CELL_DN                                          | 153 | 0.46456 | 1.648459 | 0.001068 | 0.004727 | 0.002752 | 1569 |
| GSE14769_UNSTIM_VS_240MIN_LPS_BMDM_DN                                                              | 166 | 0.45313 | 1.626229 | 0.001069 | 0.004727 | 0.002752 | 2547 |

|                                                               |     |         |          |          |          |          |      |
|---------------------------------------------------------------|-----|---------|----------|----------|----------|----------|------|
| GSE43863_NAIVE_VS_TH1_EFF_CD4_TCELL_D6_LCMV_DN                | 126 | 0.47395 | 1.643431 | 0.001069 | 0.004727 | 0.002752 | 1004 |
| GSE11961_FOLLICULAR_BCELL_VS_PLASMA_CELL_DAY7_UP              | 155 | 0.45992 | 1.636317 | 0.001087 | 0.004799 | 0.002793 | 1945 |
| GSE21670_TGFB_VS_IL6_TREATED_STAT3_KO_CD4_TCELL_DN            | 155 | 0.45992 | 1.636328 | 0.001087 | 0.004799 | 0.002793 | 2851 |
| GSE23502_BM_VS_COLON_TUMOR_MYELOID_DERIVED_SUPPRESSOR_CELL_DN | 169 | 0.44438 | 1.597552 | 0.001092 | 0.004815 | 0.002803 | 2357 |
| GSE17974_IL4_AND_ANTI_IL12_VS_UNTREATED_2H_ACT_CD4_TCELL_DN   | 133 | 0.48051 | 1.682699 | 0.001093 | 0.004816 | 0.002803 | 1416 |
| GSE360_T_GONDII_VS_B_MALAYI_HIGH_DOSE_MAC_DN                  | 155 | 0.45943 | 1.634576 | 0.001099 | 0.004836 | 0.002815 | 1556 |
| GSE43700_UNTREATED_VS_IL10_TREATED_PBMC_DN                    | 158 | 0.45893 | 1.633213 | 0.001103 | 0.00485  | 0.002824 | 1746 |
| GSE24634_TEFF_VS_TCONV_DAY5_IN_CULTURE_DN                     | 149 | 0.46934 | 1.65906  | 0.001108 | 0.004869 | 0.002834 | 1974 |
| GSE37301_PRO_BCELL_VS_RAG2_KO_NK_CELL_DN                      | 141 | 0.47538 | 1.672131 | 0.001109 | 0.004871 | 0.002835 | 2466 |
| GSE21033_CTRL_VS_POLYIC_STIM_DC_12H_UP                        | 125 | 0.47108 | 1.626908 | 0.001116 | 0.004894 | 0.002849 | 2072 |
| GSE11057_PBMC_VS_MEM_CD4_TCELL_DN                             | 149 | 0.46922 | 1.658637 | 0.00112  | 0.004907 | 0.002856 | 1890 |
| GSE36826_NORMAL_VS_STAPH_AUREUS_INF_SKIN_DN                   | 173 | 0.44094 | 1.593848 | 0.001121 | 0.004907 | 0.002856 | 2092 |
| GSE6090_UNSTIM_VS_DC_SIGN_STIM_DC_DN                          | 110 | 0.49756 | 1.70088  | 0.001121 | 0.004907 | 0.002856 | 1251 |
| GSE17186_BLOOD_VS_CORD_BLOOD_NAIVE_BCELL_UP                   | 162 | 0.45392 | 1.618587 | 0.00113  | 0.00494  | 0.002876 | 2333 |
| GSE7831_UNSTIM_VS_CPG_STIM_PDC_1H_UP                          | 160 | 0.45764 | 1.634615 | 0.001145 | 0.004999 | 0.00291  | 2803 |
| GSE43863_NAIVE_VS_LY6C_LOW_CXCR5NEG_CD4_EFF_TCELL_D6_LCMV_UP  | 120 | 0.48687 | 1.683456 | 0.001148 | 0.005007 | 0.002915 | 1449 |
| GSE29618_MONOCYTE_VS_MDC_DN                                   | 148 | 0.47141 | 1.659009 | 0.001153 | 0.005028 | 0.002927 | 1402 |
| GSE33425_CD161_HIGH_VS_NEG_CD8_TCELL_DN                       | 162 | 0.45334 | 1.616521 | 0.001165 | 0.005074 | 0.002954 | 2310 |
| GSE12845_IGD_POS_BLOOD_VS_NAIVE_TONSIL_BCELL_DN               | 165 | 0.44797 | 1.604519 | 0.001169 | 0.005087 | 0.002961 | 2522 |
| GSE22886_NAIVE_TCELL_VS_MONOCYTE_UP                           | 161 | 0.45686 | 1.629836 | 0.001172 | 0.005087 | 0.002961 | 2061 |
| GSE2585_CTEC_VS_THYMIC_DC_DN                                  | 161 | 0.45701 | 1.63037  | 0.001172 | 0.005087 | 0.002961 | 1758 |
| GSE360_CTRL_VS_B_MALAYI_HIGH_DOSE_DC_UP                       | 161 | 0.457   | 1.63033  | 0.001172 | 0.005087 | 0.002961 | 1639 |
| GSE43955_TH0_VS_TGFB_IL6_TH17_ACT_CD4_TCELL_20H_UP            | 159 | 0.46079 | 1.641355 | 0.001173 | 0.005089 | 0.002962 | 2548 |
| GSE5589_WT_VS_IL6_KO_LPS_STIM_MACROPHAGE_45MIN_DN             | 162 | 0.45292 | 1.615027 | 0.001176 | 0.005097 | 0.002967 | 1884 |
| GSE31082_DP_VS_CD4_SP_THYMOCYTE_DN                            | 163 | 0.45382 | 1.618426 | 0.001178 | 0.005099 | 0.002968 | 1455 |

|                                                                       |     |         |          |          |          |          |      |
|-----------------------------------------------------------------------|-----|---------|----------|----------|----------|----------|------|
| GSE3982_BCELL_VS_TH2_UP                                               | 151 | 0.4653  | 1.648302 | 0.001184 | 0.005121 | 0.002981 | 2035 |
| GSE13485_PRE_VS_POST_YF17D_VACCINATION_PBMC_UP                        | 145 | 0.4657  | 1.640345 | 0.001193 | 0.005155 | 0.003001 | 2091 |
| GSE37532_WT_VS_PPARG_KO_VISCERAL_ADIPOSE_TIS_SUE_TCONV_UP             | 164 | 0.45176 | 1.615108 | 0.001195 | 0.00516  | 0.003004 | 1777 |
| GSE32901_NAIVE_VS_TH17_NEG_CD4_TCELL_UP                               | 142 | 0.47046 | 1.652702 | 0.001198 | 0.005166 | 0.003007 | 1183 |
| GSE40274_CTRL_VS_HELIOS_TRANSDUCED_ACTIVATE_D_CD4_TCELL_UP            | 132 | 0.47747 | 1.669029 | 0.001204 | 0.005188 | 0.00302  | 2361 |
| GSE7219_UNSTIM_VS_LPS_AND_ANTI_CD40_STIM_DC_UP                        | 145 | 0.46513 | 1.638306 | 0.001217 | 0.005239 | 0.00305  | 2460 |
| GSE24574_NAIVE_VS_TCONV_CD4_TCELL_DN                                  | 171 | 0.43825 | 1.580767 | 0.001219 | 0.005243 | 0.003052 | 2443 |
| GSE40274_FOXP3_VS_FOXP3_AND_XBP1_TRANSDUCED_ACTIVATED_CD4_TCELL_DN    | 120 | 0.48463 | 1.67571  | 0.00122  | 0.005243 | 0.003052 | 2444 |
| GSE19401_PAM2CSK4_VS_RETINOIC_ACID_AND_PAM2CSK4_STIM_FOLLICULAR_DC_DN | 168 | 0.44845 | 1.613787 | 0.001223 | 0.005253 | 0.003058 | 1541 |
| GSE45365_CD8A_DC_VS_CD11B_DC_IFNAR_KO_UP                              | 148 | 0.47085 | 1.657045 | 0.001224 | 0.005255 | 0.003059 | 2218 |
| GSE13887_RESTING_VS_ACT_CD4_TCELL_UP                                  | 74  | 0.52654 | 1.696964 | 0.001232 | 0.005283 | 0.003075 | 1823 |
| GSE22025_TGFB1_VS_TGFB1_AND_PROGESTERONE_TREATED_CD4_TCELL_UP         | 158 | 0.4572  | 1.627057 | 0.001242 | 0.005319 | 0.003096 | 1571 |
| GSE26343_UNSTIM_VS_LPS_STIM_NFAT5_KO_MACROPHAGE_UP                    | 163 | 0.45293 | 1.615244 | 0.001248 | 0.005341 | 0.003109 | 2261 |
| GSE411_100MIN_VS_400MIN_IL6_STIM_MACROPHAGE_UP                        | 154 | 0.45776 | 1.629696 | 0.001252 | 0.005355 | 0.003117 | 1841 |
| GSE30083_SP1_VS_SP4_THYMOCYTE_DN                                      | 155 | 0.45809 | 1.629828 | 0.00126  | 0.005384 | 0.003134 | 1875 |
| GSE28726_ACT_CD4_TCELL_VS_ACT_VA24NEG_NKTCELL_DN                      | 156 | 0.44748 | 1.592714 | 0.001266 | 0.005406 | 0.003147 | 2209 |
| GSE17580_TREG_VS_TEFF_UP                                              | 169 | 0.44095 | 1.585246 | 0.001275 | 0.005439 | 0.003166 | 2011 |
| GSE46606_DAY1_VS_DAY3_CD40L_IL2_IL5_STIMULATE_D_BCELL_DN              | 147 | 0.46728 | 1.648264 | 0.001286 | 0.005479 | 0.00319  | 1530 |
| GSE10239_KLRG1INT_VS_KLRG1HIGH_EFF_CD8_TCELL_DN                       | 164 | 0.44773 | 1.600695 | 0.001288 | 0.005479 | 0.00319  | 2610 |
| GSE17721_CTRL_VS_POLYIC_6H_BMDC_DN                                    | 164 | 0.4477  | 1.600569 | 0.001288 | 0.005479 | 0.00319  | 2681 |
| GSE26030_UNSTIM_VS_RESTIM_TH1_DAY15_POST_POLARIZATION_DN              | 156 | 0.44689 | 1.590612 | 0.00129  | 0.005482 | 0.003191 | 1483 |

|                                                                               |     |         |          |          |          |          |      |
|-------------------------------------------------------------------------------|-----|---------|----------|----------|----------|----------|------|
| GSE39820_TGFBETA3_IL6_VS_TGFBETA3_IL6_IL23A_TREATED_CD4_TCELL_UP              | 162 | 0.45204 | 1.611882 | 0.001316 | 0.00559  | 0.003254 | 2316 |
| GSE32255_UNSTIM_VS_4H_LPS_STIM_DC_UP                                          | 149 | 0.46515 | 1.644235 | 0.001331 | 0.005649 | 0.003288 | 2335 |
| GSE23308_CTRL_VS_CORTICOSTERONE_TREATED_MACROPHAGE_MINERALCORTICOID_REC_KO_DN | 167 | 0.44343 | 1.594816 | 0.001362 | 0.005769 | 0.003358 | 2184 |
| GSE3982_DC_VS_MAC_DN                                                          | 167 | 0.44313 | 1.593749 | 0.001362 | 0.005769 | 0.003358 | 1488 |
| GSE3982_EOSINOPHIL_VS_EFF_MEMORY_CD4_TCELL_UP                                 | 164 | 0.44612 | 1.59493  | 0.001381 | 0.005844 | 0.003402 | 1746 |
| GSE43955_1H_VS_20H_ACT_CD4_TCELL_UP                                           | 168 | 0.44623 | 1.605783 | 0.001383 | 0.005849 | 0.003405 | 2820 |
| GSE37416_CTRL_VS_48H_F_TULARENSIS_LVS_NEUTROPHIL_UP                           | 147 | 0.46527 | 1.641183 | 0.001404 | 0.005927 | 0.00345  | 1134 |
| GSE17721_POLYIC_VS_GARDIQUIMOD_2H_BMDC_DN                                     | 153 | 0.45936 | 1.630015 | 0.001404 | 0.005927 | 0.00345  | 1507 |
| GSE9988_LPS_VS_VEHICLE_TREATED_MONOCYTE_DN                                    | 159 | 0.45718 | 1.628476 | 0.001406 | 0.005929 | 0.003452 | 2604 |
| GSE41867_NAIVE_VS_DAY6_LCMV_ARMSTRONG_EFFECTOR_CD8_TCELL_UP                   | 163 | 0.45092 | 1.608085 | 0.001411 | 0.005942 | 0.003459 | 2117 |
| GSE17721_CTRL_VS_CPG_1H_BMDC_DN                                               | 170 | 0.44124 | 1.586072 | 0.001411 | 0.005942 | 0.003459 | 1959 |
| GSE22935_UNSTIM_VS_24H_MBOVIS_BCG_STIM_MYD88_KO_MACROPHAGE_UP                 | 160 | 0.45478 | 1.624392 | 0.001422 | 0.005982 | 0.003482 | 2070 |
| GSE3982_BASOPHIL_VS_TH2_UP                                                    | 164 | 0.44484 | 1.59034  | 0.001427 | 0.005995 | 0.00349  | 2600 |
| GSE3720_UNSTIM_VS_PMA_STIM_VD2_GAMMADELTA_TCELL_UP                            | 131 | 0.47858 | 1.668554 | 0.001428 | 0.005995 | 0.00349  | 1641 |
| GSE17721_LPS_VS_GARDIQUIMOD_16H_BMDC_DN                                       | 163 | 0.45067 | 1.607188 | 0.001434 | 0.006019 | 0.003504 | 1756 |
| GSE30971_CTRL_VS_LPS_STIM_MACROPHAGE_WBP7_KO_2H_DN                            | 151 | 0.46269 | 1.639055 | 0.001442 | 0.006045 | 0.003519 | 2083 |
| GSE28783_ANTI_MIR33_VS_CTRL_ATHEROSCLEROSIS_MACROPHAGE_UP                     | 164 | 0.44437 | 1.588668 | 0.00145  | 0.006076 | 0.003537 | 1461 |
| GSE5589_LPS_VS_LPS_AND_IL6_STIM_IL6_KO_MACROPHAGE_45MIN_UP                    | 163 | 0.45012 | 1.605225 | 0.001458 | 0.006101 | 0.003552 | 2240 |
| GSE3982_EOSINOPHIL_VS_TH2_UP                                                  | 149 | 0.46318 | 1.637292 | 0.001473 | 0.006153 | 0.003582 | 1917 |
| GSE3982_NKCELL_VS_TH2_UP                                                      | 149 | 0.46319 | 1.637305 | 0.001473 | 0.006153 | 0.003582 | 1936 |
| GSE9509_10MIN_VS_30MIN_LPS_STIM_IL10_KO_MACROPHAGE_UP                         | 163 | 0.44995 | 1.604624 | 0.001481 | 0.006183 | 0.0036   | 2287 |
| GSE17721_CTRL_VS_LPS_1H_BMDC_DN                                               | 168 | 0.44473 | 1.600391 | 0.001497 | 0.006246 | 0.003636 | 1977 |
| GSE10463_CD40L_AND_VA347_VS_CD40L_IN_DC_UP                                    | 145 | 0.46171 | 1.626267 | 0.0015   | 0.006252 | 0.003639 | 2376 |

|                                                                                      |     |         |          |          |          |          |      |
|--------------------------------------------------------------------------------------|-----|---------|----------|----------|----------|----------|------|
| GSE7768_OVA_WITH_LPS_VS_OVA_WITH_MPL_IMMUNIZED_MOUSE_WHOLE_SPLEEN_6H_DN              | 139 | 0.47068 | 1.650204 | 0.001506 | 0.006271 | 0.00365  | 2272 |
| GSE2770_IL12_VS_TGFB_AND_IL12_TREATED_ACT_CD4_TCELL_48H_UP                           | 165 | 0.44056 | 1.577986 | 0.001516 | 0.006309 | 0.003672 | 1368 |
| GSE22935_WT_VS_MYD88_KO_MACROPHAGE_12H_MBOVIS_BCG_STIM_UP                            | 158 | 0.45262 | 1.610778 | 0.00152  | 0.006319 | 0.003679 | 1416 |
| GSE17721_LPS_VS_CPG_12H_BMDC_UP                                                      | 162 | 0.45063 | 1.60685  | 0.001526 | 0.006338 | 0.003689 | 2296 |
| HALLMARK_UNFOLDED_PROTEIN_RESPONSE                                                   | 95  | 0.50001 | 1.671203 | 0.001536 | 0.006373 | 0.00371  | 2359 |
| GSE17301_IFNA2_VS_IFNA2_AND_ACD3_ACD28_STIM_CD8_TCELL_UP                             | 152 | 0.46367 | 1.643095 | 0.001553 | 0.00644  | 0.003749 | 2351 |
| HALLMARK_APICAL_JUNCTION                                                             | 174 | 0.43144 | 1.559091 | 0.001556 | 0.006448 | 0.003754 | 1364 |
| GSE13411_IGM_VS_SWITCHED_MEMORY_BCELL_DN                                             | 165 | 0.44048 | 1.577694 | 0.001563 | 0.006468 | 0.003765 | 1563 |
| GSE29949_CD8_NEG_DC_SPLEEN_VS_CD8_POS_DC_SPLEEN_UP                                   | 164 | 0.44279 | 1.583027 | 0.001566 | 0.006474 | 0.003769 | 1946 |
| GSE43955_TH0_VS_TGFB_IL6_IL23_TH17_ACT_CD4_TCELL_52H_DN                              | 161 | 0.45198 | 1.612417 | 0.001566 | 0.006474 | 0.003769 | 1933 |
| GSE7460_FOXP3_MUT_VS_WT_ACT_WITH_TGFB_TCONV_UP                                       | 169 | 0.43614 | 1.567929 | 0.001574 | 0.006499 | 0.003783 | 1993 |
| GSE14000_TRANSLATED_RNA_VS_MRNA_DC_DN                                                | 135 | -0.3662 | -1.52038 | 0.001577 | 0.006505 | 0.003787 | 3649 |
| GSE27241_CTRL_VS_DIGOXIN_TREATED_RORGT_KO_CD4_TCELL_IN_TH17_POLARIZING_CONDITIONS_DN | 154 | 0.45367 | 1.61513  | 0.001597 | 0.006583 | 0.003832 | 1609 |
| GSE16450_CTRL_VS_IFNA_12H_STIM_MATURE_NEURON_CELL_LINE_DN                            | 167 | 0.44024 | 1.583334 | 0.001637 | 0.006741 | 0.003924 | 1982 |
| GSE32986_UNSTIM_VS_CURDLAN_LOWDOSE_STIM_DC_UP                                        | 163 | 0.44849 | 1.599426 | 0.001644 | 0.006767 | 0.00394  | 2947 |
| GSE17721_CPG_VS_GARDIQUIMOD_12H_BMDC_DN                                              | 152 | 0.46308 | 1.641018 | 0.001646 | 0.00677  | 0.003941 | 2350 |
| GSE24292_WT_VS_PPARG_KO_MACROPHAGE_DN                                                | 165 | 0.43945 | 1.574018 | 0.001655 | 0.0068   | 0.003959 | 2463 |
| GSE17974_IL4_AND_ANTI_IL12_VS_UNTREATED_4H_ACT_CD4_TCELL_DN                          | 127 | 0.47259 | 1.639619 | 0.001659 | 0.006801 | 0.003959 | 1780 |
| GSE6259_FLT3L_INDUCED_VS_WT_SPLENIC_DC_33D1_POS_UP                                   | 138 | 0.46467 | 1.626413 | 0.001659 | 0.006801 | 0.003959 | 2083 |
| GSE24634_TREG_VS_TCONV_POST_DAY10_IL4_CONVERSION_UP                                  | 167 | 0.44001 | 1.582516 | 0.00166  | 0.006801 | 0.003959 | 1730 |
| GSE12366_GC_BCELL_VS_PLASMA_CELL_DN                                                  | 142 | 0.46369 | 1.628907 | 0.001672 | 0.006846 | 0.003985 | 2281 |

|                                                                            |     |         |          |          |          |          |      |
|----------------------------------------------------------------------------|-----|---------|----------|----------|----------|----------|------|
| GSE18804_SPLEEN_MACROPHAGE_VS_TUMORAL_MACROPHAGE_UP                        | 153 | 0.45615 | 1.618615 | 0.001683 | 0.006884 | 0.004007 | 1008 |
| GSE32986_UNSTIM_VS_CURDLAN_LOWDOSE_STIM_DC_DN                              | 163 | 0.44727 | 1.595053 | 0.001714 | 0.007003 | 0.004076 | 2363 |
| GSE7764_NKCELL_VS_SPLENOCYTE_DN                                            | 163 | 0.44763 | 1.596347 | 0.001714 | 0.007003 | 0.004076 | 2104 |
| GSE17974_IL4_AND_ANTI_IL12_VS_UNTREATED_48H_ACT_CD4_TCELL_UP               | 142 | 0.46227 | 1.623908 | 0.001719 | 0.007017 | 0.004085 | 2293 |
| GSE4590_PRE_BCELL_VS_LARGE_PRE_BCELL_UP                                    | 137 | 0.46082 | 1.608021 | 0.001722 | 0.007023 | 0.004088 | 2073 |
| GSE43955_1H_VS_60H_ACT_CD4_TCELL_WITH_TGFB_IL6_DN                          | 166 | 0.44544 | 1.598652 | 0.001735 | 0.007068 | 0.004114 | 1918 |
| GSE24972_MARGINAL_ZONE_BCELL_VS_FOLLICULAR_BCELL_IRF8_KO_UP                | 152 | 0.46122 | 1.634407 | 0.00174  | 0.007083 | 0.004123 | 2031 |
| GSE9650_NAIVE_VS_EXHAUSTED_CD8_TCELL_DN                                    | 164 | 0.44128 | 1.577613 | 0.001752 | 0.007127 | 0.004149 | 1563 |
| GSE26488_HDAC7_KO_VS_VP16_TRANSGENIC_HDAC7_KO_DOUBLE_POSITIVE_THYMOCYTE_UP | 137 | 0.4605  | 1.606889 | 0.00177  | 0.007196 | 0.004189 | 2529 |
| GSE19941_LPS_VS_LPS_AND_IL10_STIM_IL10_KO_MACROPHAGE_DN                    | 126 | 0.46344 | 1.60699  | 0.001784 | 0.007247 | 0.004218 | 1938 |
| GSE20715_WT_VS_TLR4_KO_6H_OZONE_LUNG_UP                                    | 164 | 0.44016 | 1.573632 | 0.001799 | 0.007292 | 0.004245 | 1507 |
| GSE23502_WT_VS_HDC_KO_MYELOID_DERIVED_SUPPRESSOR_CELL_COLON_TUMOR_UP       | 161 | 0.44885 | 1.601247 | 0.001799 | 0.007292 | 0.004245 | 2314 |
| GSE42724_NAIVE_VS_B1_BCELL_UP                                              | 157 | 0.45737 | 1.628992 | 0.001822 | 0.00738  | 0.004296 | 2039 |
| GSE15330_HSC_VS_GRANULOCYTE_MONOCYTE_PROGRAMMATOR_IKAROS_KO_UP             | 165 | 0.43776 | 1.567944 | 0.001863 | 0.007543 | 0.004391 | 2565 |
| GSE27786_ERYTHROBLAST_VS_MONO_MAC_UP                                       | 156 | -0.348  | -1.475   | 0.001866 | 0.007547 | 0.004393 | 2683 |
| GSE360_DC_VS_MAC_B_MALAYI_HIGH_DOSE_UP                                     | 165 | 0.43717 | 1.565832 | 0.001933 | 0.007811 | 0.004547 | 1320 |
| GSE36826_NORMAL_VS_STAPH_AUREUS_INF_IL1R_KO_SKIN_DN                        | 161 | 0.44736 | 1.59593  | 0.001938 | 0.007824 | 0.004555 | 1816 |
| GSE9006_HEALTHY_VS_TYPE_1_DIABETES_PBMC_4MONTH_POST_DX_UP                  | 163 | 0.44488 | 1.586527 | 0.001948 | 0.007858 | 0.004574 | 3077 |
| GSE33162_HDAC3_KO_VS_HDAC3_KO_MACROPHAGE_DN                                | 168 | 0.43827 | 1.577171 | 0.001955 | 0.00788  | 0.004587 | 1746 |
| GSE45365_NK_CELL_VS_BCELL_MCMV_INFECTION_UP                                | 157 | 0.45625 | 1.624997 | 0.001961 | 0.007892 | 0.004594 | 2594 |
| GSE9988_ANTI_TREM1_VS_CTRL_TREATED_MONOCYTES_DN                            | 153 | 0.45358 | 1.609501 | 0.001961 | 0.007892 | 0.004594 | 3049 |

|                                                                                                     |     |         |          |          |          |          |      |
|-----------------------------------------------------------------------------------------------------|-----|---------|----------|----------|----------|----------|------|
| GSE25088_WT_VS_STAT6_KO_MACROPHAGE_ROSIGLIT<br>AZONE_STIM_DN                                        | 162 | 0.44594 | 1.590135 | 0.001992 | 0.008009 | 0.004662 | 1816 |
| GSE11961_PLASMA_CELL_DAY7_VS_MEMORY_BCELL_<br>DAY40_DN                                              | 156 | 0.43973 | 1.565116 | 0.00201  | 0.008076 | 0.004701 | 1879 |
| GSE3720_UNSTIM_VS_LPS_STIM_VD1_GAMMADELTA_T<br>CELL_DN                                              | 113 | 0.46776 | 1.604705 | 0.002027 | 0.008138 | 0.004738 | 2126 |
| GSE36009_UNSTIM_VS_LPS_STIM_DC_UP                                                                   | 156 | 0.43928 | 1.56352  | 0.002033 | 0.008156 | 0.004748 | 1883 |
| GSE19888_NO_PRETREAT_VS_ADENOSINE_A3R_INHIBIT<br>OR_PRETREATED_MAST_CELL_TCELL_MEMBRANES_A<br>CT_DN | 155 | 0.4499  | 1.600677 | 0.002046 | 0.008201 | 0.004774 | 2328 |
| GSE8835_HEALTHY_VS_CLL_CD4_TCELL_UP                                                                 | 169 | 0.43232 | 1.554225 | 0.002079 | 0.008327 | 0.004848 | 1759 |
| GSE411_UNSTIM_VS_100MIN_IL6_STIM_MACROPHAGE_<br>DN                                                  | 156 | 0.43806 | 1.559182 | 0.002149 | 0.008601 | 0.005007 | 2470 |
| GSE1448_CTRL_VS_ANTI_VBETA5_DP_THYMOCYTE_DN                                                         | 165 | 0.43562 | 1.560274 | 0.002164 | 0.008654 | 0.005038 | 2084 |
| GSE3982_DC_VS_BASOPHIL_DN                                                                           | 154 | 0.44822 | 1.595743 | 0.002194 | 0.008759 | 0.005099 | 2533 |
| GSE43863_DAY6_EFF_VS_DAY150_MEM_TFH_CD4_TCEL<br>L_DN                                                | 154 | 0.44874 | 1.597594 | 0.002194 | 0.008759 | 0.005099 | 1777 |
| GSE9037_WT_VS_IRAK4_KO_BMDM_UP                                                                      | 150 | 0.45559 | 1.610437 | 0.002209 | 0.008806 | 0.005126 | 2623 |
| GSE37532_WT_VS_PPARG_KO_VISCERAL_ADIPOSE_TIS<br>SUE_TREG_UP                                         | 150 | -0.3569 | -1.51353 | 0.002209 | 0.008806 | 0.005126 | 4192 |
| GSE41176_WT_VS_TAK1_KO_UNSTIM_BCELL_UP                                                              | 161 | 0.44617 | 1.591699 | 0.002216 | 0.008826 | 0.005138 | 2439 |
| GSE17974_0H_VS_72H_IN_VITRO_ACT_CD4_TCELL_UP                                                        | 131 | 0.46961 | 1.637263 | 0.002219 | 0.008831 | 0.005141 | 2032 |
| GSE14000_UNSTIM_VS_4H_LPS_DC_UP                                                                     | 153 | -0.3564 | -1.51066 | 0.002226 | 0.00885  | 0.005152 | 3136 |
| GSE40274_CTRL_VS_FOXP3_AND_HELIOS_TRANSDUCE<br>D_ACTIVATED_CD4_TCELL_UP                             | 152 | 0.45666 | 1.618253 | 0.00223  | 0.008858 | 0.005157 | 2226 |
| GSE13522_CTRL_VS_T_CRUZI_Y_STRAIN_INF_SKIN_BA<br>LBC_MOUSE_DN                                       | 92  | 0.49784 | 1.658074 | 0.002232 | 0.008858 | 0.005157 | 1613 |
| GSE36078_WT_VS_IL1R_KO_LUNG_DC_AFTER_AD5_INF<br>_DN                                                 | 159 | 0.45048 | 1.604621 | 0.002242 | 0.008893 | 0.005177 | 2097 |
| GSE11057_EFF_MEM_VS_CENT_MEM_CD4_TCELL_DN                                                           | 152 | 0.45644 | 1.617482 | 0.002254 | 0.008926 | 0.005196 | 2405 |
| GSE360_DC_VS_MAC_L_DONOVANI_DN                                                                      | 155 | 0.44858 | 1.59599  | 0.002254 | 0.008926 | 0.005196 | 1325 |
| GSE32164_RESTING_DIFFERENTIATED_VS_CMYC_INHIB<br>ITED_MACROPHAGE_UP                                 | 170 | 0.43345 | 1.558057 | 0.00226  | 0.008943 | 0.005206 | 1625 |
| GSE17721_LPS_VS_CPG_24H_BMDC_DN                                                                     | 166 | 0.44134 | 1.583917 | 0.002263 | 0.008947 | 0.005208 | 1624 |
| GSE27291_0H_VS_7D_STIM_GAMMADELTA_TCELL_DN                                                          | 137 | 0.45596 | 1.591048 | 0.002276 | 0.008992 | 0.005234 | 2184 |

|                                                                             |     |         |          |          |          |          |      |
|-----------------------------------------------------------------------------|-----|---------|----------|----------|----------|----------|------|
| GSE40274_LEF1_VS_FOXP3_AND_LEF1_TRANSDUCE<br>D_ACTIVATED_CD4_TCELL_DN       | 161 | 0.44548 | 1.589219 | 0.002286 | 0.009023 | 0.005252 | 1606 |
| GSE17721_CTRL_VS_POLYIC_24H_BMDC_DN                                         | 167 | 0.43448 | 1.562635 | 0.0023   | 0.009066 | 0.005277 | 2569 |
| GSE37416_CTRL_VS_24H_F_TULARENSIS_LVS_NEUTRO<br>PHIL_DN                     | 167 | 0.43438 | 1.562264 | 0.0023   | 0.009066 | 0.005277 | 2760 |
| GSE22886_NAIVE_BCELL_VS_DC_UP                                               | 132 | 0.46727 | 1.633379 | 0.002324 | 0.009152 | 0.005328 | 2104 |
| GSE10856_CTRL_VS_TNFRSF6B_IN_MACROPHAGE_UP                                  | 135 | 0.45808 | 1.601248 | 0.002327 | 0.009156 | 0.00533  | 1779 |
| GSE22886_NAIVE_CD4_TCELL_VS_DC_UP                                           | 156 | 0.43546 | 1.549921 | 0.002335 | 0.009181 | 0.005344 | 1471 |
| GSE39152_CD103_NEG_VS_POS_MEMORY_CD8_TCELL_<br>DN                           | 157 | 0.4527  | 1.612371 | 0.002356 | 0.00925  | 0.005385 | 1969 |
| GSE21360_TERTIARY_VS_QUATERNARY_MEMORY_CD8_<br>_TCELL_UP                    | 156 | 0.43432 | 1.545849 | 0.002359 | 0.00925  | 0.005385 | 2019 |
| GSE29949_CD8_NEG_DC_SPLEEN_VS_CD8_POS_DC_SPL<br>EEN_DN                      | 156 | 0.43536 | 1.549573 | 0.002359 | 0.00925  | 0.005385 | 2426 |
| GSE360_L_DONOVANI_VS_M_TUBERCULOSIS_MAC_UP                                  | 162 | 0.4427  | 1.578583 | 0.002364 | 0.009266 | 0.005394 | 1894 |
| GSE14769_40MIN_VS_360MIN_LPS_BMDM_DN                                        | 149 | 0.45444 | 1.606394 | 0.002368 | 0.009273 | 0.005398 | 1676 |
| GSE360_DC_VS_MAC_DN                                                         | 150 | 0.45408 | 1.605084 | 0.002374 | 0.009289 | 0.005408 | 1315 |
| GSE42724_NAIVE_BCELL_VS_PLASMABLAST_DN                                      | 146 | 0.45017 | 1.589701 | 0.002392 | 0.00935  | 0.005443 | 1086 |
| GSE34156_UNTREATED_VS_24H_NOD2_AND_TLR1_TLR<br>2_LIGAND_TREATED_MONOCYTE_UP | 150 | 0.45352 | 1.60313  | 0.002398 | 0.009367 | 0.005453 | 1754 |
| GOLDRATH_EFF_VS_MEMORY_CD8_TCELL_UP                                         | 164 | 0.43577 | 1.557917 | 0.002402 | 0.009376 | 0.005458 | 2021 |
| GSE31082_CD4_VS_CD8_SP_THYMOCYTE_UP                                         | 149 | 0.45378 | 1.604043 | 0.002439 | 0.009513 | 0.005538 | 2339 |
| GSE3982_EOSINOPHIL_VS_DC_UP                                                 | 157 | 0.45203 | 1.609981 | 0.002449 | 0.009536 | 0.005551 | 2548 |
| GSE39916_B_CELL_SPLEEN_VS_PLASMA_CELL_BONE_<br>MARROW_DN                    | 157 | 0.45208 | 1.610142 | 0.002449 | 0.009536 | 0.005551 | 2852 |
| GSE22886_NAIVE_CD8_TCELL_VS_DC_UP                                           | 156 | 0.43382 | 1.54407  | 0.002452 | 0.00954  | 0.005554 | 2694 |
| GSE16450_CTRL_VS_IFNA_6H_STIM_IMMATURE_NEUR<br>ON_CELL_LINE_DN              | 142 | 0.45489 | 1.597977 | 0.002455 | 0.009544 | 0.005556 | 2072 |
| GSE43863_LY6C_INT_CXCR5POS_VS_LY6C_LOW_CXCR5<br>NEG_EFFECTOR_CD4_TCELL_UP   | 162 | 0.44203 | 1.576165 | 0.002458 | 0.009549 | 0.005559 | 1873 |
| GSE27786_CD4_TCELL_VS_NKTCELL_DN                                            | 154 | 0.445   | 1.584271 | 0.002471 | 0.009582 | 0.005578 | 2558 |
| GSE4748_CTRL_VS_CYANOBACTERIUM_LPSLIKE_STIM<br>_DC_3H_UP                    | 166 | 0.44007 | 1.579378 | 0.002471 | 0.009582 | 0.005578 | 1510 |
| GSE24142_EARLY_THYMIC_PROGENITOR_VS_DN3_THY<br>MOCYTE_DN                    | 164 | 0.43501 | 1.55523  | 0.002495 | 0.009656 | 0.005621 | 1820 |

|                                                                        |     |         |          |          |          |          |      |
|------------------------------------------------------------------------|-----|---------|----------|----------|----------|----------|------|
| GSE34179_THPOK_KO_VS_WT_VA14I_NKTCELL_DN                               | 158 | 0.44396 | 1.579951 | 0.002495 | 0.009656 | 0.005621 | 1841 |
| GSE46606_IRF4_KO_VS_WT_CD40L_IL2_IL5_3DAY_STIM<br>ULATED_BCELL_UP      | 153 | 0.44839 | 1.591094 | 0.002495 | 0.009656 | 0.005621 | 1572 |
| HALLMARK_E2F_TARGETS                                                   | 159 | -0.3486 | -1.48359 | 0.002522 | 0.009752 | 0.005677 | 4012 |
| GSE6875_TCONV_VS_FOXP3_KO_TREG_UP                                      | 144 | 0.45073 | 1.587489 | 0.002534 | 0.009789 | 0.005698 | 1866 |
| GSE19941_LPS_VS_LPS_AND_IL10_STIM_IL10_KO_NFKB<br>P50_KO_MACROPHAGE_UP | 150 | 0.45273 | 1.600316 | 0.00254  | 0.009806 | 0.005709 | 2661 |
| GSE23505_IL6_IL1_VS_IL6_IL1_IL23_TREATED_CD4_TCE<br>LL_DN              | 162 | 0.44158 | 1.57459  | 0.002552 | 0.009843 | 0.00573  | 2947 |
| GSE20366_EX_VIVO_VS_HOMEOSTATIC_CONVERSION_<br>TREG_DN                 | 149 | -0.3554 | -1.50066 | 0.002563 | 0.009878 | 0.00575  | 2488 |
| GSE14415_INDUCED_TREG_VS_TCONV_DN                                      | 130 | 0.45332 | 1.582623 | 0.002573 | 0.00991  | 0.005769 | 2364 |
| GSE30153_LUPUS_VS_HEALTHY_DONOR_BCELL_UP                               | 155 | 0.44693 | 1.590103 | 0.002579 | 0.009925 | 0.005778 | 1472 |
| GSE33513_TCF7_KO_VS_HET_EARLY_THYMIC_PROGEN<br>ITOR_UP                 | 157 | 0.45177 | 1.609038 | 0.002589 | 0.009955 | 0.005795 | 1498 |
| GSE20727_CTRL_VS_ROS_INHIBITOR_TREATED_DC_DN                           | 159 | 0.44844 | 1.597331 | 0.002592 | 0.009959 | 0.005798 | 2087 |
| GSE20366_TREG_VS_NAIVE_CD4_TCELL_UP                                    | 150 | 0.45173 | 1.5968   | 0.002635 | 0.010102 | 0.005881 | 1713 |
| GSE37416_0H_VS_48H_F_TULARENSIS_LVS_NEUTROPHI<br>L_DN                  | 150 | 0.45137 | 1.595523 | 0.002635 | 0.010102 | 0.005881 | 1801 |
| GSE9988_LOW_LPS_VS_VEHICLE_TREATED_MONOCYT<br>E_DN                     | 161 | 0.44362 | 1.58261  | 0.002635 | 0.010102 | 0.005881 | 2826 |
| GSE26030_UNSTIM_VS_RESTIM_TH17_DAY5_POST_POL<br>ARIZATION_DN           | 154 | 0.4422  | 1.574291 | 0.002655 | 0.010171 | 0.005921 | 1546 |
| GSE13411_SWITCHED_MEMORY_BCELL_VS_PLASMA_C<br>ELL_UP                   | 151 | 0.45266 | 1.603534 | 0.002662 | 0.010189 | 0.005932 | 2583 |
| GSE22025_TGFB1_VS_TGFB1_AND_PROGESTERONE_TR<br>EATED_CD4_TCELL_DN      | 164 | 0.43409 | 1.551935 | 0.002682 | 0.010257 | 0.005971 | 1571 |
| GSE23114_WT_VS_SLE2C1_MOUSE_SPLEEN_B1A_BCELL<br>_UP                    | 157 | 0.45003 | 1.602832 | 0.002729 | 0.010417 | 0.006064 | 2418 |
| GSE30962_ACUTE_VS_CHRONIC_LCMV_PRIMARY_INF_<br>CD8_TCELL_UP            | 157 | 0.4496  | 1.601334 | 0.002729 | 0.010417 | 0.006064 | 2162 |
| GSE3982_BCELL_VS_EFF_MEMORY_CD4_TCELL_DN                               | 150 | 0.45098 | 1.59414  | 0.00273  | 0.010417 | 0.006064 | 1761 |
| GSE16697_CD4_TCELL_VS_TFH_CD4_TCELL_DN                                 | 162 | 0.43999 | 1.56889  | 0.002739 | 0.010443 | 0.006079 | 2319 |
| GSE37416_12H_VS_24H_F_TULARENSIS_LVS_NEUTROP<br>HIL_UP                 | 158 | 0.4425  | 1.574753 | 0.002775 | 0.010573 | 0.006155 | 2175 |

|                                                                      |     |         |          |          |          |          |      |
|----------------------------------------------------------------------|-----|---------|----------|----------|----------|----------|------|
| GSE15330_HSC_VS_MEGAKARYOCYTE_ERYTHROID_PROGENITOR_IKAROS_KO_UP      | 159 | 0.44693 | 1.591978 | 0.002779 | 0.010578 | 0.006158 | 2347 |
| GSE17721_LPS_VS_GARDIQUIMOD_24H_BMDC_DN                              | 162 | 0.43972 | 1.567931 | 0.002786 | 0.010597 | 0.006169 | 1470 |
| GSE37416_CTRL_VS_3H_F_TULARENSIS_LVS_NEUTROPHIL_UP                   | 141 | 0.46002 | 1.618114 | 0.002822 | 0.010709 | 0.006234 | 2248 |
| GSE41867_DAY6_VS_DAY8_LCMV_CLONE13_EFFECTOR_CD8_TCELL_UP             | 161 | 0.44182 | 1.576165 | 0.002822 | 0.010709 | 0.006234 | 1770 |
| GSE43955_1H_VS_42H_ACT_CD4_TCELL_WITH_TGFB_IL6_DN                    | 164 | 0.43258 | 1.546536 | 0.002822 | 0.010709 | 0.006234 | 1912 |
| GSE17721_LPS_VS_CPG_6H_BMDC_UP                                       | 169 | 0.4249  | 1.527537 | 0.00284  | 0.010769 | 0.006269 | 2875 |
| GSE2585_THYMIC_MACROPHAGE_VS_MTEC_DN                                 | 164 | 0.43231 | 1.545546 | 0.002869 | 0.010858 | 0.006321 | 2019 |
| GSE3039_ALPHAALPHA_CD8_TCELL_VS_B1_BCELL_UP                          | 164 | 0.43235 | 1.545716 | 0.002869 | 0.010858 | 0.006321 | 1497 |
| GSE19401_NAIVE_VS_IMMUNIZED_MOUSE_PLN_FOLLICULAR_DC_DN               | 159 | 0.44541 | 1.586573 | 0.002872 | 0.010858 | 0.006321 | 1516 |
| GSE24102_GRANULOCYSTITIC_MDSC_VS_NEUTROPHIL_DN                       | 159 | 0.44625 | 1.589537 | 0.002872 | 0.010858 | 0.006321 | 2057 |
| GSE20715_0H_VS_24H_OZONE_LUNG_DN                                     | 170 | 0.42862 | 1.540687 | 0.002883 | 0.010885 | 0.006336 | 2304 |
| GSE26488_WT_VS_VP16_TRANSGENIC_HDAC7_KO_DOUBLE_POSITIVE_THYMOCYTE_DN | 139 | 0.4582  | 1.606453 | 0.002884 | 0.010885 | 0.006336 | 2689 |
| GSE12366_NAIVE_VS_MEMORY_BCELL_DN                                    | 152 | 0.44989 | 1.594253 | 0.002887 | 0.010888 | 0.006338 | 2254 |
| GSE30971_CTRL_VS_LPS_STIM_MACROPHAGE_WBP7_HET_2H_DN                  | 155 | 0.44507 | 1.583507 | 0.002997 | 0.011296 | 0.006576 | 2215 |
| GSE24634_TEFF_VS_TCONV_DAY10_IN_CULTURE_UP                           | 165 | 0.4306  | 1.542322 | 0.003001 | 0.011301 | 0.006579 | 1260 |
| GSE43955_10H_VS_60H_ACT_CD4_TCELL_UP                                 | 160 | 0.44337 | 1.583648 | 0.003044 | 0.011453 | 0.006667 | 952  |
| GSE37605_FOXP3_FUSION_GFP_VS_IRES_GFP_TREG_C57BL6_DN                 | 143 | 0.45572 | 1.6044   | 0.003059 | 0.011501 | 0.006695 | 1993 |
| GSE34006_UNTREATED_VS_A2AR_AGONIST_TREATED_TREG_DN                   | 166 | 0.43529 | 1.562201 | 0.003071 | 0.011538 | 0.006717 | 1625 |
| GSE2770_IL12_AND_TGFB_VS_IL4_TREATED_ACT_CD4_TCELL_6H_DN             | 155 | 0.44369 | 1.578583 | 0.00309  | 0.011593 | 0.006749 | 1904 |
| GSE23114_WT_VS_SLE2C1_MOUSE_PERITONEAL_CAVITY_B1A_BCELL_DN           | 136 | 0.4545  | 1.590389 | 0.00309  | 0.011593 | 0.006749 | 1434 |
| GSE339_CD8POS_VS_CD4CD8DN_DC_UP                                      | 157 | 0.44586 | 1.587992 | 0.003102 | 0.011625 | 0.006767 | 2257 |
| GSE29618_PRE_VS_DAY7_FLU_VACCINE_MONOCYTE_UP                         | 156 | 0.42927 | 1.527905 | 0.003106 | 0.011625 | 0.006767 | 1499 |

|                                                                            |     |         |          |          |          |          |      |
|----------------------------------------------------------------------------|-----|---------|----------|----------|----------|----------|------|
| GSE5542_UNTREATED_VS_IFNA_AND_IFNG_TREATED_EPITHELIAL_CELLS_6H_DN          | 156 | 0.43041 | 1.531942 | 0.003106 | 0.011625 | 0.006767 | 2363 |
| GSE17186_NAIVE_VS_CD21LOW_TRANSITIONAL_BCELL_UP                            | 162 | 0.43767 | 1.560637 | 0.003114 | 0.011645 | 0.006779 | 2057 |
| GSE36888_STAT5_AB_KNOCKIN_VS_WT_TCELL_IL2_TREATED_17H_UP                   | 152 | 0.44841 | 1.589022 | 0.003121 | 0.011666 | 0.006791 | 1899 |
| GSE6269_FLU_VS_STREP_PNEUMO_INF_PBMC_UP                                    | 132 | 0.4622  | 1.615648 | 0.003138 | 0.011719 | 0.006822 | 2358 |
| GSE13411_IGM_MEMORY_BCELL_VS_PLASMA_CELL_D                                 | 147 | 0.44976 | 1.586462 | 0.003153 | 0.011767 | 0.00685  | 2047 |
| GSE24814_STAT5_KO_VS_WT_PRE_BCELL_DN                                       | 162 | 0.4371  | 1.558616 | 0.00316  | 0.011784 | 0.00686  | 1715 |
| GSE20500_CTRL_VS_RARA_ANTAGONIST_TREATED_CD4_TCELL_DN                      | 138 | -0.3552 | -1.48825 | 0.003169 | 0.011807 | 0.006873 | 2960 |
| GSE9960_HEALTHY_VS_GRAM_NEG_AND_POS_SEPSIS_PBMC_DN                         | 138 | 0.45377 | 1.588266 | 0.00319  | 0.011878 | 0.006914 | 3182 |
| GSE23502_WT_VS_HDC_KO_MYELOID_DERIVED_SUPPRESSOR_CELL_BM_UP                | 164 | 0.43002 | 1.53739  | 0.003195 | 0.011884 | 0.006918 | 2490 |
| GSE7568_CTRL_VS_24H_TGFB_TREATED_MACROPHAGES_WITH_IL4_AND_DEXAMETHASONE_UP | 167 | 0.42994 | 1.546309 | 0.003197 | 0.011884 | 0.006918 | 1954 |
| GSE37416_0H_VS_12H_F_TULARENSIS_LVS_NEUTROPHIL_UP                          | 156 | 0.42896 | 1.526775 | 0.003199 | 0.011884 | 0.006918 | 2011 |
| GSE21033_1H_VS_12H_POLYIC_STIM_DC_UP                                       | 137 | 0.45055 | 1.572194 | 0.003219 | 0.01195  | 0.006957 | 1820 |
| GSE17721_CTRL_VS_LPS_8H_BMDC_DN                                            | 170 | 0.42652 | 1.533153 | 0.003252 | 0.01206  | 0.007021 | 2422 |
| GSE20366_TREG_VS_NAIVE_CD4_TCELL_DEC205_CONVERSION_DN                      | 147 | 0.44865 | 1.58254  | 0.003296 | 0.012215 | 0.007111 | 2550 |
| GSE6674_CPG_VS_PL2_3_STIM_BCELL_DN                                         | 142 | 0.44823 | 1.574591 | 0.003313 | 0.012269 | 0.007142 | 2301 |
| GSE22935_24H_VS_48H_MBOVIS_BCG_STIM_MYD88_KO_MACROPHAGE_UP                 | 166 | 0.43342 | 1.555514 | 0.003394 | 0.012561 | 0.007312 | 1909 |
| GSE37605_NOD_VS_C57BL6_IRES_GFP_TREG_UP                                    | 121 | 0.47164 | 1.628186 | 0.0034   | 0.012574 | 0.00732  | 1424 |
| GSE43955_TH0_VS_TGFB_IL6_TH17_ACT_CD4_TCELL_52H_DN                         | 165 | 0.42778 | 1.532189 | 0.00342  | 0.012636 | 0.007356 | 1571 |
| GSE17721_LPS_VS_CPG_2H_BMDC_UP                                             | 166 | 0.43314 | 1.554503 | 0.00344  | 0.012703 | 0.007395 | 1950 |
| GSE11924_TH1_VS_TH2_CD4_TCELL_DN                                           | 153 | 0.44263 | 1.570665 | 0.003475 | 0.012821 | 0.007464 | 2992 |
| GSE1925_CTRL_VS_3H_IFNG_STIM_MACROPHAGE_UP                                 | 166 | 0.43275 | 1.553098 | 0.003486 | 0.012853 | 0.007482 | 2786 |
| GSE18791_CTRL_VS_NEWCASTLE_VIRUS_DC_2H_DN                                  | 126 | 0.45023 | 1.561194 | 0.003489 | 0.012853 | 0.007482 | 2548 |
| GSE360_L_MAJOR_VS_B_MALAYI_LOW_DOSE_DC_UP                                  | 163 | 0.43576 | 1.554021 | 0.003493 | 0.012857 | 0.007485 | 1865 |
| GSE2585_AIRE_KO_VS_WT_CD80_LOW_MTEC_UP                                     | 160 | 0.44061 | 1.573793 | 0.003508 | 0.012906 | 0.007513 | 1859 |

|                                                               |     |         |          |          |          |          |      |
|---------------------------------------------------------------|-----|---------|----------|----------|----------|----------|------|
| GSE20366_TREG_VS_NAIVE_CD4_TCELL_DN                           | 159 | 0.44263 | 1.576647 | 0.003526 | 0.012961 | 0.007545 | 1943 |
| GSE17186_NAIVE_VS_CD21LOW_TRANSITIONAL_BCELL_CORD_BLOOD_DN    | 166 | 0.4327  | 1.552911 | 0.003533 | 0.012964 | 0.007547 | 1387 |
| GSE28449_WT_VS_LRF_KO_GERMINAL_CENTER_BCELL_DN                | 154 | 0.4379  | 1.558978 | 0.003533 | 0.012964 | 0.007547 | 1509 |
| GSE3720_LPS_VS_PMA_STIM_VD1_GAMMADELTA_TCELL_DN               | 130 | 0.44732 | 1.561672 | 0.003535 | 0.012964 | 0.007547 | 1819 |
| GSE22611_NOD2_VS_CTRL_TRANSDUCED_HEK293T_CELL_DN              | 150 | 0.44651 | 1.57833  | 0.003537 | 0.012964 | 0.007547 | 1645 |
| GSE32164_ALTERNATIVELY_ACT_M2_VS_CMYC_INHIBITED_MACROPHAGE_UP | 156 | 0.42644 | 1.517805 | 0.003573 | 0.013079 | 0.007614 | 2383 |
| GSE3565_CTRL_VS_LPS_INJECTED_SPLENOCYTES_DN                   | 138 | 0.45179 | 1.581354 | 0.003574 | 0.013079 | 0.007614 | 2098 |
| GSE25123_CTRL_VS_IL4_STIM_PPARG_KO_MACROPHAGE_DN              | 150 | 0.44599 | 1.576493 | 0.003585 | 0.013109 | 0.007631 | 2387 |
| GSE21670_UNTREATED_VS_TGFB_TREATED_CD4_TCELL_DN               | 155 | 0.43909 | 1.56224  | 0.003601 | 0.013159 | 0.00766  | 1628 |
| GSE27786_LIN_NEG_VS_NEUTROPHIL_UP                             | 145 | -0.3452 | -1.44744 | 0.003614 | 0.013189 | 0.007678 | 3969 |
| GSE2405_0H_VS_24H_A_PHAGOCYTOPHILUM_STIM_NEUTROPHIL_DN        | 164 | 0.42809 | 1.530467 | 0.003615 | 0.013189 | 0.007678 | 1258 |
| GSE27670_CTRL_VS_BLIMP1_TRANSDUCED_GC_BCELL_UP                | 172 | 0.4135  | 1.492428 | 0.00363  | 0.013236 | 0.007705 | 1431 |
| GSE43955_TH0_VS_TGFB_IL6_TH17_ACT_CD4_TCELL_52H_UP            | 163 | 0.43435 | 1.548984 | 0.003633 | 0.013237 | 0.007705 | 1042 |
| GSE2935_UV_INACTIVATED_VS_LIVE_SENDAI_VIRUS_INF_MACROPHAGE_UP | 133 | 0.45641 | 1.598311 | 0.003651 | 0.013292 | 0.007738 | 2200 |
| GSE3565_CTRL_VS_LPS_INJECTED_DUSP1_KO_SPLENOCYTES_DN          | 135 | 0.44842 | 1.567474 | 0.00367  | 0.013351 | 0.007772 | 2155 |
| GSE12198_CTRL_VS_HIGH_IL2_STIM_NK_CELL_DN                     | 164 | 0.42709 | 1.526882 | 0.003708 | 0.01348  | 0.007847 | 2098 |
| GSE44649_WT_VS_MIR155_KO_NAIVE_CD8_TCELL_DN                   | 156 | 0.42615 | 1.516802 | 0.003713 | 0.013487 | 0.007851 | 2254 |
| GSE1460_NAIVE_CD4_TCELL_ADULT_BLOOD_VS_THYMIC_STROMAL_CELL_DN | 162 | 0.4342  | 1.548246 | 0.003722 | 0.013501 | 0.007859 | 2152 |
| GSE20715_0H_VS_48H_OZONE_TLR4_KO_LUNG_UP                      | 162 | 0.43418 | 1.548186 | 0.003722 | 0.013501 | 0.007859 | 2221 |
| GSE17974_IL4_AND_ANTI_IL12_VS_UNTREATED_12H_ACT_CD4_TCELL_UP  | 136 | 0.45107 | 1.578411 | 0.003761 | 0.013632 | 0.007935 | 2404 |
| GSE17721_LPS_VS_GARDIQUIMOD_12H_BMDC_DN                       | 149 | 0.44541 | 1.574484 | 0.003765 | 0.013636 | 0.007938 | 2760 |

|                                               |     |         |          |          |          |          |      |
|-----------------------------------------------|-----|---------|----------|----------|----------|----------|------|
| GSE26928_NAIVE_VS_CENT_MEMORY_CD4_TCELL_DN    | 131 | 0.46082 | 1.606616 | 0.003785 | 0.0137   | 0.007975 | 1721 |
| GSE40274_CTRL_VS_SATB1_TRANSDUCE              | 137 | 0.44825 | 1.564168 | 0.0038   | 0.013738 | 0.007997 | 1961 |
| GSE11961_GERMINAL_CENTER_BCELL_DAY7_VS_MEM    | 158 | 0.43716 | 1.555737 | 0.003801 | 0.013738 | 0.007997 | 1485 |
| GSE2770_TGFB_AND_IL4_ACT_VS_ACT_CD4_TCELL_48  | 153 | 0.44022 | 1.562104 | 0.003848 | 0.013896 | 0.008089 | 2238 |
| GSE16385_ROSIGLITAZONE_VS_UNTREATED_IFNG_TNF  | 144 | 0.44242 | 1.558217 | 0.00386  | 0.013928 | 0.008108 | 1633 |
| GSE1432_CTRL_VS_IFNG_24H_MICROGLIA_UP         | 175 | 0.41862 | 1.51598  | 0.003881 | 0.013993 | 0.008146 | 2065 |
| GSE12845_IGD_NEG_BLOOD_VS_DARKZONE_GC_TONSI   | 158 | 0.43704 | 1.555333 | 0.003895 | 0.014034 | 0.008169 | 1929 |
| GSE40274_HELIOS_VS_FOXP3_AND_HELIOS_TRANSDUC  | 160 | 0.43875 | 1.567138 | 0.003927 | 0.014138 | 0.00823  | 2858 |
| GSE45739_NRAS_KO_VS_WT_ACD3_ACD28_STIM_CD4_T  | 142 | 0.44518 | 1.563885 | 0.003932 | 0.014148 | 0.008236 | 1468 |
| GSE10325_LUPUS_BCELL_VS_LUPUS_MYELOID_UP      | 149 | 0.44429 | 1.570526 | 0.003955 | 0.014218 | 0.008277 | 2324 |
| GSE411_WT_VS_SOCS3_KO_MACROPHAGE_IL6_STIM_4   | 152 | 0.44259 | 1.568383 | 0.003966 | 0.01425  | 0.008295 | 2758 |
| GSE40274_LEF1_VS_FOXP3_AND_LEF1_TRANSDUCE     | 159 | 0.43975 | 1.566406 | 0.003993 | 0.014335 | 0.008345 | 2299 |
| GSE13547_CTRL_VS_ANTI_IGM_STIM_BCELL_2H_UP    | 149 | 0.44393 | 1.569231 | 0.004002 | 0.014357 | 0.008357 | 1570 |
| GSE19941_UNSTIM_VS_LPS_AND_IL10_STIM_IL10_KO_ | 143 | 0.45137 | 1.589101 | 0.004007 | 0.014365 | 0.008362 | 1737 |
| GSE37301_CD4_TCELL_VS_RAG2_KO_NK_CELL_UP      | 123 | 0.46247 | 1.600355 | 0.00402  | 0.014402 | 0.008384 | 1541 |
| GSE36009_UNSTIM_VS_LPS_STIM_NLRP10_KO_DC_UP   | 154 | 0.43495 | 1.548469 | 0.004041 | 0.014464 | 0.00842  | 3008 |
| GSE17721_CTRL_VS_GARDIQUIMOD_8H_BMDC_UP       | 154 | -0.3436 | -1.45162 | 0.004057 | 0.014511 | 0.008448 | 3182 |
| GSE17721_CTRL_VS_LPS_4H_BMDC_DN               | 164 | 0.42557 | 1.521458 | 0.004128 | 0.014744 | 0.008583 | 2413 |
| GSE17721_LPS_VS_PAM3CSK4_2H_BMDC_UP           | 161 | 0.43386 | 1.547789 | 0.004128 | 0.014744 | 0.008583 | 2182 |
| GSE30962_ACUTE_VS_CHRONIC_LCMV_PRIMARY_INF_   | 167 | 0.42626 | 1.533068 | 0.004164 | 0.014861 | 0.008651 | 2848 |
| GSE17721_PAM3CSK4_VS_CPG_16H_BMDC_DN          | 161 | 0.43372 | 1.547268 | 0.004175 | 0.014889 | 0.008668 | 2553 |
| GSE37416_CTRL_VS_24H_F_TULARENSIS_LVS_NEUTRO  | 159 | 0.4389  | 1.563351 | 0.00418  | 0.014897 | 0.008672 | 1872 |
| GSE360_DC_VS_MAC_B_MALAYI_LOW_DOSE_DN         | 170 | 0.42301 | 1.520529 | 0.00422  | 0.015016 | 0.008741 | 2214 |

|                                                                                  |     |         |          |          |          |          |      |
|----------------------------------------------------------------------------------|-----|---------|----------|----------|----------|----------|------|
| GSE38304_MYC_NEG_VS_POS_GC_BCELL_UP                                              | 158 | 0.4357  | 1.550546 | 0.004221 | 0.015016 | 0.008741 | 1757 |
| GSE36476_CTRL_VS_TSST_ACT_40H_MEMORY_CD4_TCELL_YOUNG_UP                          | 154 | 0.4344  | 1.546517 | 0.004225 | 0.015016 | 0.008741 | 2108 |
| GSE39152_SPLEEN_CD103_NEG_VS_BRAIN_CD103_POS_MEMORY_CD8_TCELL_DN                 | 166 | 0.43026 | 1.544177 | 0.004225 | 0.015016 | 0.008741 | 2079 |
| GSE20727_CTRL_VS_H2O2_TREATED_DC_UP                                              | 142 | 0.4423  | 1.553776 | 0.004266 | 0.015149 | 0.008819 | 2423 |
| GSE37301_HEMATOPOIETIC_STEM_CELL_VS_GRAN_MO_NO_PROGENITOR_DN                     | 146 | 0.43974 | 1.552851 | 0.004286 | 0.01521  | 0.008854 | 1325 |
| GSE15330_MEGAKARYOCYTE_ERYTHROID_VS_GRANULOCYTE_MONOCYTE_PROGENITOR_IKAROS_KO_DN | 164 | 0.4247  | 1.518348 | 0.004315 | 0.0153   | 0.008907 | 2420 |
| GSE41176_UNSTIM_VS_ANTI_IGM_STIM_BCELL_6H_UP                                     | 169 | 0.41891 | 1.506001 | 0.004318 | 0.0153   | 0.008907 | 2419 |
| GSE29949_MICROGLIA_VS_DC_BRAIN_DN                                                | 162 | 0.43195 | 1.540242 | 0.004331 | 0.015336 | 0.008927 | 1013 |
| GSE1432_1H_VS_24H_IFNG_MICROGLIA_UP                                              | 167 | 0.42458 | 1.527007 | 0.004348 | 0.015384 | 0.008955 | 1757 |
| GSE339_CD8POS_VS_CD4CD8DN_DC_DN                                                  | 172 | 0.41042 | 1.481309 | 0.004361 | 0.015419 | 0.008976 | 1759 |
| GSE7831_CPG_VS_INFLUENZA_STIM_PDC_1H_DN                                          | 166 | 0.43008 | 1.543513 | 0.004364 | 0.015419 | 0.008976 | 1620 |
| GSE9988_ANTI_TREM1_VS_LPS_MONOCYTE_UP                                            | 163 | 0.43148 | 1.538738 | 0.004383 | 0.015477 | 0.009009 | 2548 |
| GSE24142_ADULT_VS_FETAL_DN2_THYMOCYTE_UP                                         | 167 | 0.42427 | 1.52591  | 0.004394 | 0.015502 | 0.009024 | 2300 |
| GSE40274_FOXP3_VS_FOXP3_AND_IRF4_TRANSDUCE_ACTIVATED_CD4_TCELL_DN                | 159 | 0.43801 | 1.560205 | 0.004413 | 0.015561 | 0.009058 | 2547 |
| HALLMARK_ANDROGEN_RESPONSE                                                       | 86  | 0.49477 | 1.629319 | 0.004421 | 0.015576 | 0.009067 | 1592 |
| GSE14415_FOXP3_KO_NATURAL_TREG_VS_TCONV_DN                                       | 136 | 0.44888 | 1.57072  | 0.004432 | 0.015603 | 0.009083 | 2035 |
| GSE17974_CTRL_VS_ACT_IL4_AND_ANTI_IL12_6H_CD4_TCELL_UP                           | 145 | 0.44078 | 1.552538 | 0.004439 | 0.01561  | 0.009087 | 2211 |
| GSE15624_CTRL_VS_6H_HALOFUGINONE_TREATED_CD4_TCELL_UP                            | 102 | 0.47491 | 1.614499 | 0.004443 | 0.01561  | 0.009087 | 1647 |
| GSE33424_CD161_HIGH_VS_INT_CD8_TCELL_DN                                          | 165 | 0.42317 | 1.515678 | 0.004443 | 0.01561  | 0.009087 | 1654 |
| GSE7596_AKT_TRANSD_VS_CTRL_CD4_TCONV_WITH_TGFB_UP                                | 131 | 0.4583  | 1.597857 | 0.004461 | 0.01566  | 0.009116 | 2183 |
| GSE29614_CTRL_VS_DAY7_TIV_FLU_VACCINE_PBMC_DN                                    | 149 | 0.44117 | 1.559466 | 0.004475 | 0.015701 | 0.00914  | 2243 |
| GSE13306_RA_VS_UNTREATED_MEM_CD4_TCELL_DN                                        | 158 | 0.43455 | 1.546473 | 0.004548 | 0.015932 | 0.009274 | 1556 |
| GSE2128_C57BL6_VS_NOD_THYMOCYTE_MIMETOPE_NEGATIVE_SELECTION_DN                   | 164 | 0.42361 | 1.514471 | 0.004548 | 0.015932 | 0.009274 | 1745 |
| GSE41978_WT_VS_ID2_KO_KLRG1_LOW_EFFECTOR_CD8_TCELL_DN                            | 160 | 0.43603 | 1.557411 | 0.004577 | 0.016023 | 0.009328 | 1707 |

|                                                                            |     |         |          |          |          |          |      |
|----------------------------------------------------------------------------|-----|---------|----------|----------|----------|----------|------|
| GSE21033_3H_VS_24H_POLYIC_STIM_DC_UP                                       | 122 | 0.46174 | 1.599428 | 0.004581 | 0.016025 | 0.009329 | 1889 |
| GSE22886_IGM_MEMORY_BCELL_VS_BM_PLASMA_CELL_UP                             | 158 | 0.43388 | 1.544097 | 0.004594 | 0.016061 | 0.00935  | 2273 |
| GSE9316_CD4_TCELL_BALBC_VS_TH17_ENRI_CD4_TCELL_SKG_PMA_IONO_STIM_FR4NEG_DN | 162 | 0.43069 | 1.535759 | 0.004612 | 0.01611  | 0.009378 | 1343 |
| GSE17721_CTRL_VS_CPG_6H_BMDC_DN                                            | 170 | 0.4217  | 1.51581  | 0.004635 | 0.01618  | 0.009419 | 2857 |
| GSE17721_LPS_VS_POLYIC_1H_BMDC_UP                                          | 169 | 0.41771 | 1.501668 | 0.004641 | 0.016189 | 0.009424 | 1492 |
| GSE38304_MYC_NEG_VS_POS_GC_BCELL_DN                                        | 155 | 0.43557 | 1.549704 | 0.00467  | 0.016279 | 0.009477 | 2208 |
| GSE5679_PPARG_LIGAND_ROSIGLITAZONE_VS_RARA_AGNONIST_AM580_TREATED_DC_DN    | 154 | 0.4321  | 1.538328 | 0.004687 | 0.016327 | 0.009504 | 2049 |
| GSE15330_HSC_VS_MEGAKARYOCYTE_ERYTHROID_PROGENITOR_DN                      | 142 | 0.44002 | 1.545753 | 0.004695 | 0.016343 | 0.009514 | 1804 |
| GSE7460_TREG_VS_TCONV_ACT_WITH_TGFB_UP                                     | 155 | 0.43402 | 1.544186 | 0.004717 | 0.016406 | 0.009551 | 1611 |
| GSE3039_CD4_TCELL_VS_B1_BCELL_DN                                           | 153 | 0.43622 | 1.547893 | 0.004734 | 0.016456 | 0.00958  | 2252 |
| GSE19198_CTRL_VS_IL21_TREATED_TCELL_24H_DN                                 | 167 | 0.42303 | 1.521435 | 0.004762 | 0.016541 | 0.009629 | 1836 |
| GSE44649_WT_VS_MIR155_KO_ACTIVATED_CD8_TCELL_DN                            | 151 | 0.44118 | 1.562856 | 0.004783 | 0.016601 | 0.009664 | 2243 |
| GSE1460_CORD_VS_ADULT_BLOOD_NAIVE_CD4_TCELL_UP                             | 146 | 0.43787 | 1.546269 | 0.004807 | 0.016674 | 0.009706 | 1579 |
| GSE29615_CTRL_VS_DAY7_LAIV_FLU_VACCINE_PBMC_UP                             | 132 | 0.45417 | 1.587571 | 0.004815 | 0.01669  | 0.009716 | 873  |
| GSE26727_WT_VS_KLF2_KO_LPS_STIM_MACROPHAGE_DN                              | 153 | 0.43577 | 1.546311 | 0.004828 | 0.016712 | 0.009728 | 3003 |
| GSE2770_IL4_ACT_VS_ACT_CD4_TCELL_48H_DN                                    | 153 | 0.43596 | 1.54698  | 0.004828 | 0.016712 | 0.009728 | 1961 |
| GSE5589_LPS_AND_IL10_VS_LPS_AND_IL6_STIM_IL10_KO_MACROPHAGE_45MIN_UP       | 162 | 0.43028 | 1.5343   | 0.004846 | 0.016763 | 0.009758 | 2566 |
| GSE43955_1H_VS_42H_ACT_CD4_TCELL_UP                                        | 169 | 0.41702 | 1.499218 | 0.004873 | 0.016842 | 0.009805 | 2497 |
| GSE37532_WT_VS_PPARG_KO_LN_TCONV_DN                                        | 141 | 0.44958 | 1.581367 | 0.004908 | 0.016954 | 0.009869 | 2057 |
| GSE17721_CTRL_VS_CPG_12H_BMDC_DN                                           | 168 | 0.42277 | 1.52137  | 0.004941 | 0.017054 | 0.009928 | 2507 |
| GSE3920_IFNA_VS_IFNG_TREATED_ENDOTHELIAL_CELL_DN                           | 136 | 0.44565 | 1.559445 | 0.004959 | 0.017105 | 0.009958 | 1940 |
| GSE24210_CTRL_VS_IL35_TREATED_TCONV_CD4_TCELL_UP                           | 164 | 0.42224 | 1.509571 | 0.005016 | 0.017288 | 0.010064 | 2276 |
| GSE11961_FOLLICULAR_BCELL_VS_MEMORY_BCELL_DN_AY40_DN                       | 156 | 0.4204  | 1.496308 | 0.005022 | 0.017297 | 0.010069 | 2224 |

|                                                                                   |     |         |          |          |          |          |      |
|-----------------------------------------------------------------------------------|-----|---------|----------|----------|----------|----------|------|
| GSE17974_1H_VS_72H_UNTREATED_IN_VITRO_CD4_TCELL_UP                                | 154 | 0.43052 | 1.532728 | 0.005058 | 0.017411 | 0.010135 | 2032 |
| GSE37533_PPARG1_FOXP3_VS_FOXP3_TRANSDUCECD4_TCELL_PIOGLITAZONE_TREATED_DN         | 165 | 0.42079 | 1.507178 | 0.005096 | 0.01753  | 0.010205 | 2201 |
| GSE22432_UNTREATED_VS_TGFB1_TREATED_COMMON_DC_PROGENITOR_DN                       | 160 | 0.43469 | 1.552635 | 0.005183 | 0.017816 | 0.010372 | 2240 |
| GSE3982_EOSINOPHIL_VS_MAST_CELL_UP                                                | 156 | 0.41847 | 1.489445 | 0.00521  | 0.017894 | 0.010417 | 2127 |
| GSE40273_GATA1_KO_VS_WT_TREG_DN                                                   | 152 | 0.43621 | 1.545774 | 0.005236 | 0.017972 | 0.010462 | 2140 |
| GSE17974_0H_VS_2H_IN_VITRO_ACT_CD4_TCELL_DN                                       | 147 | 0.44093 | 1.555299 | 0.00529  | 0.01813  | 0.010554 | 3145 |
| GSE6674_UNSTIM_VS_PL2_3_STIM_BCELL_DN                                             | 145 | 0.43761 | 1.541397 | 0.005296 | 0.01813  | 0.010554 | 2299 |
| GSE19772_HCMV_INFL_VS_HCMV_INF_MONOCYTES_AND_PI3K_INHIBITION_DN                   | 161 | 0.4265  | 1.521508 | 0.005297 | 0.01813  | 0.010554 | 2878 |
| GSE43955_10H_VS_30H_ACT_CD4_TCELL_WITH_TGFB_IL6_DN                                | 161 | 0.42601 | 1.519767 | 0.005297 | 0.01813  | 0.010554 | 1454 |
| GSE34156_UNTREATED_VS_24H_NOD2_AND_TLR1_TLR2_LIGAND_TREATED_MONOCYTE_DN           | 127 | -0.3577 | -1.47816 | 0.005314 | 0.018176 | 0.010581 | 2703 |
| GSE25088_ROSIGLITAZONE_VS_IL4_AND_ROSIGLITAZONE_STIM_STAT6_KO_MACROPHAGE_DAY10_UP | 151 | 0.43853 | 1.553461 | 0.005351 | 0.018289 | 0.010647 | 2132 |
| GSE10240_IL22_VS_IL22_AND_IL17_STIM_PRIMARY_BRONCHIAL_EPITHELIAL_CELLS_DN         | 153 | 0.43411 | 1.540424 | 0.005391 | 0.018412 | 0.010719 | 2391 |
| GSE2770_IL12_VS_IL4_TREATED_ACT_CD4_TCELL_6H_DN                                   | 156 | 0.41784 | 1.487206 | 0.005397 | 0.018423 | 0.010725 | 1816 |
| GSE37301_HEMATOPOIETIC_STEM_CELL_VS_COMMON_LYMPHOID_PROGENITOR_DN                 | 166 | 0.42738 | 1.533821 | 0.00543  | 0.01852  | 0.010781 | 1856 |
| GSE33162_HDAC3_KO_VS_HDAC3_KO_MACROPHAGE_UP                                       | 158 | 0.43077 | 1.533018 | 0.005484 | 0.018691 | 0.010881 | 1714 |
| GSE13547_2H_VS_12_H_ANTI_IGM_STIM_BCELL_UP                                        | 150 | 0.43801 | 1.548298 | 0.005487 | 0.018691 | 0.010881 | 1591 |
| GSE42021_TCONV_PLN_VS_CD24LO_TCONV_THYMUS_DN                                      | 162 | 0.42915 | 1.530266 | 0.005505 | 0.018739 | 0.010908 | 2946 |
| GSE33425_CD8_ALPHAALPHA_VS_ALPHABETA_CD161_HIGH_TCELL_DN                          | 163 | 0.4254  | 1.517055 | 0.005512 | 0.018749 | 0.010915 | 1710 |
| GSE3982_MAC_VS_EFF_MEMORY_CD4_TCELL_UP                                            | 175 | 0.41351 | 1.497476 | 0.005519 | 0.018759 | 0.01092  | 2222 |
| GSE22886_IGM_MEMORY_BCELL_VS_BLOOD_PLASMA_CELL_DN                                 | 154 | 0.42948 | 1.529022 | 0.005522 | 0.018759 | 0.01092  | 2671 |

|                                                                    |     |         |          |          |          |          |      |
|--------------------------------------------------------------------|-----|---------|----------|----------|----------|----------|------|
| GSE1740_UNSTIM_VS_IFNA_STIMULATED_MCSF_IFNG_DERIVED_MACROPHAGE_UP  | 135 | 0.43931 | 1.535644 | 0.005544 | 0.01882  | 0.010956 | 2610 |
| GSE15735_2H_VS_12H_HDAC_INHIBITOR_TREATED_CD4_TCELL_DN             | 149 | 0.43804 | 1.548408 | 0.005568 | 0.018889 | 0.010996 | 1416 |
| GSE26030_UNSTIM_VS_RESTIM_TH1_DAY5_POST_POLARIZATION_DN            | 159 | 0.43504 | 1.549617 | 0.005585 | 0.018932 | 0.011021 | 1849 |
| GSE40666_WT_VS_STAT4_KO_CD8_TCELL_WITH_IFNA_STIM_90MIN_UP          | 152 | 0.43533 | 1.542676 | 0.005613 | 0.019015 | 0.011069 | 2019 |
| GSE5589_WT_VS_IL10_KO_LPS_STIM_MACROPHAGE_180MIN_DN                | 127 | 0.45106 | 1.564926 | 0.005624 | 0.019039 | 0.011083 | 1622 |
| GSE17974_IL4_AND_ANTI_IL12_VS_UNTREATED_72H_ACT_CD4_TCELL_UP       | 134 | 0.44387 | 1.551479 | 0.005641 | 0.019081 | 0.011108 | 1611 |
| GSE11961_MEMORY_BCELL_DAY7_VS_GERMINAL_CENTER_BCELL_DAY40_UP       | 155 | 0.43266 | 1.539335 | 0.00565  | 0.019101 | 0.01112  | 1869 |
| GSE17974_0H_VS_4H_IN_VITRO_ACT_CD4_TCELL_DN                        | 149 | 0.43666 | 1.543532 | 0.005664 | 0.019115 | 0.011127 | 1882 |
| GSE3982_DC_VS_CENT_MEMORY_CD4_TCELL_DN                             | 141 | 0.44717 | 1.572913 | 0.005671 | 0.019115 | 0.011127 | 1460 |
| GSE40274_CTRL_VS_LEF1_TRANSDUCED_ACTIVATED_CD4_TCELL_UP            | 143 | 0.44477 | 1.565856 | 0.005671 | 0.019115 | 0.011127 | 2292 |
| GSE3203_INFLUENZA_INF_VS_IFNB_TREATED_LN_BCELL_DN                  | 153 | 0.43399 | 1.539974 | 0.005672 | 0.019115 | 0.011127 | 1304 |
| GSE22886_NAIVE_BCELL_VS_BLOOD_PLASMA_CELL_UP                       | 145 | 0.4358  | 1.534996 | 0.005678 | 0.019115 | 0.011127 | 1872 |
| GSE17974_1.5H_VS_72H_IL4_AND_ANTI_IL12_ACT_CD4_TCELL_UP            | 159 | 0.43453 | 1.547792 | 0.005679 | 0.019115 | 0.011127 | 2416 |
| GSE40274_CTRL_VS_FOXP3_AND_SATB1_TRANSDUCED_ACTIVATED_CD4_TCELL_UP | 140 | 0.43768 | 1.536658 | 0.005685 | 0.019115 | 0.011127 | 2676 |
| GSE43955_TH0_VS_TGFB_IL6_TH17_ACT_CD4_TCELL_42H_DN                 | 167 | 0.41883 | 1.506331 | 0.005687 | 0.019115 | 0.011127 | 1521 |
| GSE40274_CTRL_VS_IRF4_TRANSDUCED_ACTIVATED_CD4_TCELL_UP            | 125 | 0.43808 | 1.512948 | 0.005692 | 0.019115 | 0.011127 | 1495 |
| GSE37532_WT_VS_PPARG_KO_LN_TCONV_UP                                | 162 | 0.4277  | 1.52508  | 0.005693 | 0.019115 | 0.011127 | 1961 |
| GSE22886_NAIVE_BCELL_VS_MONOCYTE_UP                                | 133 | 0.44589 | 1.561452 | 0.005707 | 0.019149 | 0.011147 | 2104 |
| GSE22601_DOUBLE_NEGATIVE_VS_CD4_SINGLE_POSITIVE_THYMOCYTE_UP       | 155 | 0.43248 | 1.538696 | 0.005744 | 0.019258 | 0.011211 | 2208 |
| GSE26495_PD1HIGH_VS_PD1LOW_CD8_TCELL_UP                            | 136 | 0.44196 | 1.546524 | 0.005826 | 0.01952  | 0.011363 | 1451 |
| GSE20715_0H_VS_48H_OZONE_LUNG_UP                                   | 160 | 0.43288 | 1.546173 | 0.005837 | 0.019532 | 0.01137  | 1628 |

|                                                             |     |         |          |          |          |          |      |
|-------------------------------------------------------------|-----|---------|----------|----------|----------|----------|------|
| GSE8868_SPLEEN_VS_INTESTINE_CD11B_POS_CD11C_N<br>EG_DC_DN   | 160 | 0.43289 | 1.546193 | 0.005837 | 0.019532 | 0.01137  | 2315 |
| GSE9650_EXHAUSTED_VS_MEMORY_CD8_TCELL_UP                    | 164 | 0.41955 | 1.499948 | 0.005859 | 0.019592 | 0.011405 | 2230 |
| GSE17721_CTRL_VS_PAM3CSK4_8H_BMDC_DN                        | 159 | 0.43396 | 1.545765 | 0.005867 | 0.019603 | 0.011412 | 1975 |
| GSE21670_STAT3_KO_VS_WT_CD4_TCELL_IL6_TREATE<br>D_UP        | 154 | 0.42758 | 1.522234 | 0.005894 | 0.01968  | 0.011456 | 1742 |
| GSE13547_CTRL_VS_ANTI_IGM_STIM_ZFX_KO_BCELL_1<br>2H_DN      | 135 | 0.43647 | 1.525727 | 0.00593  | 0.019788 | 0.011519 | 2067 |
| GSE9037_CTRL_VS_LPS_1H_STIM_IRAK4_KO_BMDM_D                 | 158 | 0.42851 | 1.524974 | 0.005953 | 0.019852 | 0.011556 | 1728 |
| GSE39152_BRAIN_VS_SPLEEN_CD103_NEG_MEMORY_C<br>D8_TCELL_UP  | 163 | 0.42345 | 1.510108 | 0.005983 | 0.019909 | 0.01159  | 2487 |
| GSE12392_WT_VS_IFNB_KO_CD8A_NEG_SPLEEN_DC_D                 | 166 | 0.4244  | 1.523147 | 0.005986 | 0.019909 | 0.01159  | 2477 |
| GSE339_EX_VIVO_VS_IN_CULTURE_CD4POS_DC_DN                   | 166 | 0.4237  | 1.520636 | 0.005986 | 0.019909 | 0.01159  | 1734 |
| GSE3982_MAST_CELL_VS_DC_UP                                  | 154 | 0.42689 | 1.519782 | 0.005986 | 0.019909 | 0.01159  | 1542 |
| GSE3982_BCELL_VS_CENT_MEMORY_CD4_TCELL_DN                   | 160 | 0.43189 | 1.542621 | 0.006024 | 0.02002  | 0.011655 | 2455 |
| GSE24574_BCL6_HIGH_VS_LOW_TFH_CD4_TCELL_UP                  | 156 | 0.41506 | 1.477322 | 0.006054 | 0.020102 | 0.011702 | 2136 |
| GSE19401_UNSTIM_VS_PAM2CSK4_STIM_FOLLICULAR_<br>DC_DN       | 167 | 0.41752 | 1.501644 | 0.006057 | 0.020102 | 0.011702 | 2391 |
| GSE7460_FOXP3_MUT_VS_WT_ACT_WITH_TGFB_TCON<br>V_DN          | 152 | 0.43395 | 1.537793 | 0.006085 | 0.020183 | 0.011749 | 1421 |
| GSE19888_CTRL_VS_T_CELL_MEMBRANES_ACT_MAST<br>_CELL_DN      | 156 | -0.3296 | -1.39713 | 0.006128 | 0.02031  | 0.011823 | 3182 |
| GSE32255_UNSTIM_VS_4H_LPS_STIM_DC_DN                        | 123 | 0.45267 | 1.566458 | 0.006219 | 0.0206   | 0.011992 | 1875 |
| GSE37532_WT_VS_PPARG_KO_VISCERAL_ADIPOSE_TIS<br>SUE_TREG_DN | 170 | 0.41461 | 1.490345 | 0.006257 | 0.020697 | 0.012049 | 2078 |
| GSE39820_CTRL_VS_TGFBETA3_IL6_CD4_TCELL_UP                  | 170 | 0.41421 | 1.488899 | 0.006257 | 0.020697 | 0.012049 | 2334 |
| GSE27859_MACROPHAGE_VS_CD11C_INT_F480_INT_DC_<br>DN         | 163 | 0.42186 | 1.504428 | 0.006266 | 0.020712 | 0.012057 | 2471 |
| GSE13306_LAMINA_PROPRIA_VS_SPLEEN_TREG_UP                   | 165 | 0.4167  | 1.492507 | 0.006312 | 0.020837 | 0.01213  | 1781 |
| GSE37301_LYMPHOID_PRIMED_MPP_VS_GRAN_MONO_<br>PROGENITOR_UP | 165 | 0.41662 | 1.492235 | 0.006312 | 0.020837 | 0.01213  | 1913 |
| GSE2706_LPS_VS_R848_AND_LPS_8H_STIM_DC_UP                   | 153 | 0.43257 | 1.534944 | 0.006328 | 0.020876 | 0.012152 | 2347 |
| GSE26928_EFF_MEM_VS_CENTR_MEM_CD4_TCELL_UP                  | 143 | 0.44251 | 1.557897 | 0.006338 | 0.020895 | 0.012164 | 1498 |
| GSE7831_UNSTIM_VS_INFLUENZA_STIM_PDC_1H_UP                  | 154 | 0.42527 | 1.514016 | 0.006358 | 0.020946 | 0.012193 | 1998 |
| GSE17721_CPG_VS_GARDIQUIMOD_12H_BMDC_UP                     | 168 | 0.41821 | 1.504955 | 0.006419 | 0.021128 | 0.0123   | 2333 |

|                                                                       |     |         |          |          |          |          |      |
|-----------------------------------------------------------------------|-----|---------|----------|----------|----------|----------|------|
| GSE7460_CTRL_VS_TGFB_TREATED_ACT_FOXP3_MUT_TCONV_UP                   | 161 | 0.42202 | 1.505551 | 0.006422 | 0.021128 | 0.0123   | 1757 |
| GSE411_UNSTIM_VS_100MIN_IL6_STIM_MACROPHAGE_UP                        | 159 | 0.43281 | 1.541679 | 0.00643  | 0.021141 | 0.012307 | 2801 |
| GSE360_CTRL_VS_L_DONOVANI_DC_UP                                       | 157 | 0.43334 | 1.5434   | 0.006516 | 0.021408 | 0.012462 | 1424 |
| GSE11961_GERMINAL_CENTER_BCELL_DAY7_VS_PLASMA_CELL_DAY7_UP            | 162 | 0.42606 | 1.519219 | 0.00654  | 0.021449 | 0.012486 | 2540 |
| GSE7852_LN_VS_THYMUS_TCONV_UP                                         | 162 | 0.42569 | 1.51792  | 0.00654  | 0.021449 | 0.012486 | 1557 |
| GSE26030_UNSTIM_VS_RESTIM_TH17_DAY5_POST_POLARIZATION_UP              | 140 | 0.43525 | 1.52814  | 0.006545 | 0.021449 | 0.012486 | 1913 |
| GSE3565_DUSP1_VS_WT_SPLENOCYTES_DN                                    | 140 | 0.43478 | 1.526478 | 0.006545 | 0.021449 | 0.012486 | 2155 |
| GSE43955_10H_VS_60H_ACT_CD4_TCELL_DN                                  | 173 | 0.41143 | 1.487174 | 0.00663  | 0.021711 | 0.012639 | 1944 |
| GSE10239_KLRG1INT_VS_KLRG1HIGH_EFF_CD8_TCELL_UP                       | 159 | -0.3327 | -1.41579 | 0.006657 | 0.021784 | 0.012681 | 1846 |
| GSE21063_WT_VS_NFATC1_KO_3H_ANTI_IGM_STIM_BCELL_UP                    | 160 | 0.42954 | 1.534247 | 0.006678 | 0.021839 | 0.012713 | 2224 |
| GSE28783_ANTI_MIR33_VS_UNTREATED_ATHEROSCLEROSIS_MACROPHAGE_UP        | 164 | 0.41658 | 1.489342 | 0.006703 | 0.021907 | 0.012753 | 1720 |
| GSE19941_UNSTIM_VS_LPS_AND_IL10_STIM_IL10_KO_NFKBP50_KO_MACROPHAGE_DN | 156 | 0.41317 | 1.470577 | 0.006711 | 0.02192  | 0.012761 | 1804 |
| GSE17721_LPS_VS_PAM3CSK4_4H_BMDC_UP                                   | 171 | 0.40896 | 1.475126 | 0.006763 | 0.022073 | 0.01285  | 2752 |
| GSE17721_CPG_VS_GARDIQUIMOD_6H_BMDC_UP                                | 168 | 0.41697 | 1.500512 | 0.006788 | 0.022126 | 0.01288  | 2439 |
| GSE3982_CENT_MEMORY_CD4_TCELL_VS_TH1_DN                               | 168 | 0.41719 | 1.501285 | 0.006788 | 0.022126 | 0.01288  | 2107 |
| GSE22611_NOD2_TRANSDUCED_VS_CTRL_HEK293T_STIMULATED_WITH_MDP_2H_UP    | 157 | 0.43223 | 1.539442 | 0.006797 | 0.02214  | 0.012888 | 2149 |
| GSE9509_10MIN_VS_30MIN_LPS_STIM_IL10_KO_MACROPHAGE_DN                 | 141 | 0.44247 | 1.556365 | 0.006815 | 0.022183 | 0.012914 | 2119 |
| GSE18281_MEDULLARY_THYMOCYTE_VS_WHOLE_MEDULLA_THYMUS_UP               | 140 | 0.43387 | 1.523276 | 0.006832 | 0.022214 | 0.012932 | 1726 |
| GSE36891_POLYIC_TLR3_VS_PAM_TLR2_STIM_PERITONEAL_MACROPHAGE_DN        | 131 | 0.44907 | 1.565646 | 0.006833 | 0.022214 | 0.012932 | 2008 |
| GSE20715_0H_VS_6H_OZONE_LUNG_DN                                       | 162 | 0.42404 | 1.512018 | 0.006917 | 0.022427 | 0.013055 | 1972 |
| GSE24634_NAIVE_CD4_TCELL_VS_DAY3_IL4_CONV_TREG_UP                     | 162 | 0.42395 | 1.511708 | 0.006917 | 0.022427 | 0.013055 | 2095 |

|                                                                   |     |         |          |          |          |          |      |
|-------------------------------------------------------------------|-----|---------|----------|----------|----------|----------|------|
| GSE28737_FOLLICULAR_VS_MARGINAL_ZONE_BCELL_BCL6_HET_UP            | 162 | 0.42451 | 1.513712 | 0.006917 | 0.022427 | 0.013055 | 2684 |
| GSE3982_EOSINOPHIL_VS_BASOPHIL_UP                                 | 162 | 0.42468 | 1.51433  | 0.006917 | 0.022427 | 0.013055 | 1502 |
| GSE3920_IFNA_VS_IFNB_TREATED_ENDOTHELIAL_CELL_UP                  | 144 | 0.431   | 1.517986 | 0.006996 | 0.02267  | 0.013197 | 2335 |
| GSE19825_NAIVE_VS_IL2RAHIGH_DAY3_EFF_CD8_TCELL_UP                 | 162 | 0.42341 | 1.509799 | 0.007011 | 0.022698 | 0.013213 | 1889 |
| GSE24574_BCL6_HIGH_TFH_VS_TFH_CD4_TCELL_UP                        | 150 | 0.43304 | 1.530725 | 0.007014 | 0.022698 | 0.013213 | 1834 |
| GSE42724_B1_BCELL_VS_PLASMABLAST_UP                               | 155 | -0.3369 | -1.42405 | 0.007056 | 0.022819 | 0.013283 | 3395 |
| GSE24142_ADULT_VS_FETAL_EARLY_THYMIC_PROGENITOR_UP                | 157 | 0.43098 | 1.534998 | 0.007078 | 0.022875 | 0.013316 | 1961 |
| GSE27786_BCELL_VS_NKCELL_DN                                       | 169 | 0.40965 | 1.472699 | 0.0071   | 0.022931 | 0.013349 | 2147 |
| GSE46242_TH1_VS_ANERGIC_TH1_CD4_TCELL_UP                          | 144 | 0.4308  | 1.517288 | 0.007282 | 0.023502 | 0.013681 | 1728 |
| GSE5542_UNTREATED_VS_IFNA_AND_IFNG_TREATED_EPITHELIAL_CELLS_6H_UP | 143 | 0.43816 | 1.542567 | 0.007291 | 0.023517 | 0.01369  | 1781 |
| GSE2770_TGFB_AND_IL4_VS_IL4_TREATED_ACT_CD4_TCELL_48H_UP          | 144 | 0.43055 | 1.516387 | 0.007377 | 0.023778 | 0.013842 | 2363 |
| GSE360_T_GONDII_VS_B_MALAYI_LOW_DOSE_DC_DN                        | 167 | 0.415   | 1.492567 | 0.007444 | 0.023977 | 0.013958 | 1718 |
| GSE17301_CTRL_VS_48H_IFNA2_STIM_CD8_TCELL_UP                      | 157 | 0.42952 | 1.529812 | 0.007453 | 0.023992 | 0.013966 | 2819 |
| GSE12366_NAIVE_VS_MEMORY_BCELL_UP                                 | 138 | 0.4358  | 1.525375 | 0.007473 | 0.024039 | 0.013994 | 1777 |
| GSE3982_MAST_CELL_VS_EFF_MEMORY_CD4_TCELL_UP                      | 162 | 0.42252 | 1.506625 | 0.007481 | 0.024051 | 0.014001 | 2579 |
| GSE16450_IMMATURE_VS_MATURE_NEURON_CELL_LINE_12H_IFNA_STIM_UP     | 160 | 0.42742 | 1.526675 | 0.007518 | 0.024155 | 0.014061 | 2336 |
| GSE3982_DC_VS_BASOPHIL_UP                                         | 168 | 0.41513 | 1.493872 | 0.007619 | 0.024463 | 0.01424  | 1342 |
| GSE14415_NATURAL_TREG_VS_FOXP3_KO_NATURAL_TREG_DN                 | 133 | 0.43957 | 1.53933  | 0.007722 | 0.024776 | 0.014423 | 2592 |
| GSE27786_LSK_VS_MONO_MAC_UP                                       | 153 | -0.3341 | -1.41614 | 0.007752 | 0.024856 | 0.014469 | 3307 |
| GSE2770_UNTREATED_VS_ACT_CD4_TCELL_6H_UP                          | 152 | 0.42927 | 1.521205 | 0.007783 | 0.024941 | 0.014519 | 2722 |
| GSE3565_DUSP1_VS_WT_SPLENOCYTES_POST_LPS_INJECTION_DN             | 126 | 0.43322 | 1.502201 | 0.007797 | 0.024968 | 0.014534 | 2126 |
| GSE22611_NOD2_VS_MUTANT_NOD2_TRANSDUCEDK293T_CELL_DN              | 150 | 0.43114 | 1.524002 | 0.007873 | 0.025196 | 0.014667 | 2064 |
| GSE15271_CXCR4_POS_VS_NEG_GC_BCELL_DN                             | 133 | 0.43905 | 1.5375   | 0.007914 | 0.025309 | 0.014733 | 1971 |
| GSE13411_IGM_MEMORY_BCELL_VS_PLASMA_CELL_UP                       | 156 | 0.4104  | 1.460731 | 0.007932 | 0.025346 | 0.014755 | 1652 |

|                                                                         |     |         |          |          |          |          |      |
|-------------------------------------------------------------------------|-----|---------|----------|----------|----------|----------|------|
| GSE37301_RAG2_KO_VS_RAG2_AND_ETS1_KO_NK_CEL<br>L_UP                     | 169 | 0.40693 | 1.462936 | 0.007936 | 0.025346 | 0.014755 | 2094 |
| GSE2405_0H_VS_6H_A_PHAGOCYTOPHILUM_STIM_NEU<br>TROPIL_DN                | 150 | 0.43087 | 1.52304  | 0.008064 | 0.02574  | 0.014984 | 1850 |
| GSE41867_DAY8_EFFECTOR_VS_DAY30_EXHAUSTED_C<br>D8_TCELL_LCMV_CLONE13_DN | 165 | 0.40774 | 1.460421 | 0.008089 | 0.025803 | 0.015021 | 2518 |
| GSE18804_BRAIN_VS_COLON_TUMORAL_MACROPHAG<br>E_UP                       | 157 | 0.42768 | 1.523235 | 0.008109 | 0.025851 | 0.015049 | 1415 |
| GSE42088_UNINF_VS_LEISHMANIA_INF_DC_4H_DN                               | 154 | 0.42227 | 1.503352 | 0.008121 | 0.025872 | 0.015061 | 1414 |
| GSE17721_0.5H_VS_24H_GARDIQUIMOD_BMDC_DN                                | 162 | 0.42032 | 1.498769 | 0.00814  | 0.025915 | 0.015086 | 2439 |
| GSE16385_UNTREATED_VS_12H_ROSIGLITAZONE_TREA<br>TED_MACROPHAGE_DN       | 130 | 0.43071 | 1.503693 | 0.008169 | 0.02599  | 0.015129 | 1110 |
| GSE20715_0H_VS_24H_OZONE_TLR4_KO_LUNG_UP                                | 167 | 0.4129  | 1.485027 | 0.008183 | 0.02602  | 0.015147 | 2180 |
| GSE17721_CTRL_VS_GARDIQUIMOD_8H_BMDC_DN                                 | 171 | 0.40449 | 1.459    | 0.008235 | 0.026167 | 0.015232 | 2786 |
| GSE21546_WT_VS_SAPIA_KO_AND_ELK1_KO_DP_THY<br>MOCYTES_DN                | 152 | 0.42806 | 1.516918 | 0.008255 | 0.026213 | 0.01526  | 2463 |
| GSE17721_4_VS_24H_CPG_BMDC_UP                                           | 168 | 0.41347 | 1.487895 | 0.008266 | 0.02623  | 0.015269 | 2192 |
| GSE2770_TGFB_AND_IL4_VS_TGFB_AND_IL12_TREATE<br>D_ACT_CD4_TCELL_6H_DN   | 167 | 0.41253 | 1.483699 | 0.008276 | 0.026246 | 0.015279 | 2699 |
| GSE2585_AIRE_KO_VS_WT_CD80_LOW_MTEC_DN                                  | 161 | 0.41617 | 1.484666 | 0.008297 | 0.026295 | 0.015307 | 1849 |
| GSE17721_CTRL_VS_CPG_0.5H_BMDC_DN                                       | 156 | 0.40967 | 1.458121 | 0.008307 | 0.026311 | 0.015317 | 1728 |
| HALLMARK_MTORC1_SIGNALING                                               | 171 | 0.40442 | 1.458773 | 0.008327 | 0.026357 | 0.015343 | 1654 |
| GSE11961_MEMORY_BCELL_DAY7_VS_GERMINAL_CEN<br>TER_BCELL_DAY7_DN         | 161 | 0.41605 | 1.484248 | 0.00839  | 0.026541 | 0.01545  | 2580 |
| GSE43700_UNTREATED_VS_IL10_TREATED_PBMC_UP                              | 159 | 0.42561 | 1.516016 | 0.008401 | 0.026557 | 0.01546  | 1625 |
| GSE1925_CTRL_VS_IFNG_PRIMED_MACROPHAGE_DN                               | 149 | 0.4304  | 1.521404 | 0.008424 | 0.026613 | 0.015492 | 1248 |
| GSE6259_BCELL_VS_CD8_TCELL_DN                                           | 150 | 0.42896 | 1.516317 | 0.008446 | 0.026664 | 0.015522 | 2367 |
| GSE15330_WT_VS_IKAROS_KO_HSC_UP                                         | 151 | 0.4261  | 1.509429 | 0.008476 | 0.026742 | 0.015568 | 2617 |
| GSE3982_MAC_VS_BCELL_UP                                                 | 169 | 0.40526 | 1.456913 | 0.008492 | 0.026777 | 0.015588 | 2045 |
| GSE7852_TREG_VS_TCONV_UP                                                | 166 | 0.41718 | 1.497218 | 0.008585 | 0.027053 | 0.015748 | 2824 |
| GSE22025_UNTREATED_VS_PROGESTERONE_TREATED<br>_CD4_TCELL_UP             | 155 | 0.41849 | 1.488928 | 0.008639 | 0.027205 | 0.015837 | 2336 |
| GSE17721_POLYIC_VS_GARDIQUIMOD_12H_BMDC_UP                              | 169 | 0.40443 | 1.453938 | 0.008678 | 0.02731  | 0.015898 | 1317 |
| GSE22611_UNSTIM_VS_6H_MDP_STIM_NOD2_TRANSDU<br>CED_HEK293T_CELL_DN      | 152 | 0.42752 | 1.515014 | 0.008727 | 0.027446 | 0.015977 | 1597 |

|                                                                    |     |         |          |          |          |          |      |
|--------------------------------------------------------------------|-----|---------|----------|----------|----------|----------|------|
| GSE17721_ALL_VS_24H_PAM3CSK4_BMDC_DN                               | 167 | 0.41057 | 1.476652 | 0.008831 | 0.027755 | 0.016157 | 2359 |
| GSE17974_0.5H_VS_72H_IL4_AND_ANTI_IL12_ACT_CD4_TCELL_UP            | 157 | 0.42666 | 1.519602 | 0.008859 | 0.02782  | 0.016195 | 2327 |
| GSE17721_LPS_VS_POLYIC_8H_BMDC_DN                                  | 166 | 0.41663 | 1.49524  | 0.008864 | 0.02782  | 0.016195 | 2138 |
| GSE16385_IFNG_TNF_VS_IL4_STIM_MACROPHAGE_ROSI_GLITAZONE_TREATED_UP | 131 | 0.44423 | 1.548776 | 0.008868 | 0.02782  | 0.016195 | 1988 |
| GSE22886_DAY1_VS_DAY7_MONOCYTE_IN_CULTURE_DN                       | 166 | -0.3114 | -1.33798 | 0.008891 | 0.027873 | 0.016226 | 2721 |
| GSE21927_SPLEEN_VS_C26GM_TUMOR_MONOCYTE_BALBC_UP                   | 120 | 0.44544 | 1.540191 | 0.008926 | 0.027967 | 0.016281 | 1704 |
| GSE12392_CD8A_POS_VS_NEG_SPLEEN_IFNB_KO_DC_UP                      | 161 | 0.41495 | 1.480324 | 0.008953 | 0.028032 | 0.016318 | 2144 |
| GSE7764_IL15_TREATED_VS_CTRL_NK_CELL_24H_DN                        | 149 | 0.42928 | 1.517439 | 0.008995 | 0.028146 | 0.016385 | 2568 |
| GSE27786_CD8_TCELL_VS_NKCELL_DN                                    | 157 | 0.42625 | 1.518142 | 0.009047 | 0.028273 | 0.016459 | 2851 |
| GSE26912_TUMORICIDAL_VS_CTRL_MACROPHAGE_DN                         | 169 | 0.40384 | 1.451829 | 0.009049 | 0.028273 | 0.016459 | 1170 |
| GSE7460_FOXP3_MUT_VS_HET_ACT_TCONV_UP                              | 142 | 0.42677 | 1.49919  | 0.009053 | 0.028273 | 0.016459 | 1945 |
| GSE40274_CTRL_VS_EOS_TRANSDUCED_ACTIVATED_CD4_TCELL_DN             | 113 | 0.43249 | 1.483716 | 0.009072 | 0.028313 | 0.016482 | 1802 |
| GSE12366_PLASMA_CELL_VS_NAIVE_BCELL_UP                             | 146 | 0.42576 | 1.503491 | 0.00909  | 0.028354 | 0.016506 | 2672 |
| GSE17721_LPS_VS_GARDIQUIMOD_8H_BMDC_UP                             | 167 | 0.40869 | 1.46988  | 0.009108 | 0.028391 | 0.016527 | 2716 |
| GSE1925_3H_VS_24H_IFNG_STIM_MACROPHAGE_UP                          | 157 | 0.42607 | 1.517523 | 0.00914  | 0.028461 | 0.016568 | 1914 |
| GSE17721_LPS_VS_GARDIQUIMOD_6H_BMDC_UP                             | 166 | 0.41637 | 1.494314 | 0.009142 | 0.028461 | 0.016568 | 2347 |
| KAECH_DAY15_EFF_VS_MEMORY_CD8_TCELL_DN                             | 163 | 0.4134  | 1.474275 | 0.009187 | 0.028582 | 0.016639 | 2438 |
| GSE27670_CTRL_VS_BLIMP1_TRANSDUCED_GC_BCELL_DN                     | 167 | 0.40779 | 1.466648 | 0.009293 | 0.028894 | 0.01682  | 2003 |
| GSE41867_LCMV_ARMSTRONG_VS_CLONE13_DAY6_EFFECTOR_CD8_TCELL_DN      | 163 | -0.3195 | -1.37098 | 0.009346 | 0.029042 | 0.016906 | 3917 |
| GSE32986_GMCSF_VS_GMCSF_AND_CURDLAN_LOWDOSE_STIM_DC_UP             | 167 | 0.40767 | 1.466193 | 0.009385 | 0.029145 | 0.016966 | 2422 |
| GSE16522_MEMORY_VS_NAIVE_ANTI_CD3CD28_STIM_CD8_TCELL_DN            | 162 | 0.41709 | 1.487243 | 0.009457 | 0.02935  | 0.017086 | 2155 |
| GSE21063_WT_VS_NFATC1_KO_BCELL_UP                                  | 153 | 0.42386 | 1.504038 | 0.009515 | 0.029493 | 0.017169 | 1867 |
| GSE46606_IRF4HIGH_VS_WT_CD40L_IL2_IL5_DAY3_STIMULATED_BCELL_DN     | 157 | 0.42543 | 1.515219 | 0.009515 | 0.029493 | 0.017169 | 1353 |
| GSE20715_WT_VS_TLR4_KO_48H_OZONE_LUNG_UP                           | 168 | 0.41013 | 1.475903 | 0.009559 | 0.029592 | 0.017226 | 1922 |

|                                                                           |     |         |          |          |          |          |      |
|---------------------------------------------------------------------------|-----|---------|----------|----------|----------|----------|------|
| GSE23114_PERITONEAL_CAVITY_B1A_BCELL_VS_SPLE<br>EN_BCELL_DN               | 168 | 0.41005 | 1.475605 | 0.009559 | 0.029592 | 0.017226 | 2282 |
| GSE39152_CD103_NEG_VS_POS_MEMORY_CD8_TCELL_<br>UP                         | 169 | 0.40228 | 1.446224 | 0.009607 | 0.029721 | 0.017302 | 2021 |
| GSE16385_MONOCYTE_VS_MACROPHAGE_UP                                        | 160 | 0.42183 | 1.506689 | 0.009667 | 0.029883 | 0.017396 | 2361 |
| GSE14699_NAIVE_VS_ACT_CD8_TCELL_DN                                        | 141 | 0.43687 | 1.536679 | 0.009674 | 0.029883 | 0.017396 | 1804 |
| GSE17974_0H_VS_6H_IN_VITRO_ACT_CD4_TCELL_UP                               | 132 | 0.44038 | 1.539389 | 0.009678 | 0.029883 | 0.017396 | 1890 |
| GSE7764_NKCELL_VS_SPLENOCYTE_UP                                           | 158 | 0.41881 | 1.490454 | 0.009704 | 0.029945 | 0.017432 | 2343 |
| GSE17721_POLYIC_VS_CPG_4H_BMDC_DN                                         | 156 | 0.40724 | 1.449475 | 0.009716 | 0.029964 | 0.017443 | 2392 |
| GSE17721_PAM3CSK4_VS_CPG_6H_BMDC_DN                                       | 162 | 0.41561 | 1.481974 | 0.009741 | 0.029983 | 0.017454 | 2028 |
| GSE36476_CTRL_VS_TSST_ACT_16H_MEMORY_CD4_TC<br>ELL_OLD_DN                 | 162 | 0.4155  | 1.481584 | 0.009741 | 0.029983 | 0.017454 | 2046 |
| GSE9650_EFFECTOR_VS_EXHAUSTED_CD8_TCELL_DN                                | 162 | 0.41592 | 1.483094 | 0.009741 | 0.029983 | 0.017454 | 2230 |
| GSE36078_UNTREATED_VS_AD5_INF_MOUSE_LUNG_DC<br>UP                         | 154 | 0.41879 | 1.490972 | 0.009794 | 0.030128 | 0.017538 | 1344 |
| GSE30962_PRIMARY_VS_SECONDARY_CHRONIC_LCMV<br>_INF_CD8_TCELL_DN           | 161 | 0.41234 | 1.470997 | 0.009892 | 0.030412 | 0.017704 | 1281 |
| GSE39556_CD8A_DC_VS_NK_CELL_UP                                            | 162 | 0.41542 | 1.481298 | 0.00993  | 0.030508 | 0.01776  | 2220 |
| GSE3337_CTRL_VS_4H_IFNG_IN_CD8POS_DC_UP                                   | 148 | 0.43444 | 1.528919 | 0.009942 | 0.030526 | 0.01777  | 2114 |
| GSE3982_MAST_CELL_VS_BCELL_DN                                             | 151 | 0.42288 | 1.498019 | 0.009993 | 0.030664 | 0.017851 | 2168 |
| GSE41978_ID2_KO_AND_BIM_KO_VS_BIM_KO_KLRG1_L<br>OW_EFFECTOR_CD8_TCELL_DN  | 165 | 0.40378 | 1.446241 | 0.010055 | 0.030822 | 0.017943 | 1648 |
| GSE25088_CTRL_VS_IL4_STIM_MACROPHAGE_UP                                   | 143 | 0.4305  | 1.515621 | 0.010057 | 0.030822 | 0.017943 | 2132 |
| GSE2770_IL4_ACT_VS_ACT_CD4_TCELL_2H_DN                                    | 162 | 0.41454 | 1.478165 | 0.010119 | 0.030993 | 0.018042 | 2237 |
| GSE18791_UNSTIM_VS_NEWCATSLE_VIRUS_DC_18H_UP                              | 141 | -0.3308 | -1.3764  | 0.010139 | 0.031034 | 0.018066 | 2980 |
| GSE22935_UNSTIM_VS_12H_MBOVIS_BCG_STIM_MYD88<br>_KO_MACROPHAGE_UP         | 166 | 0.41333 | 1.483397 | 0.010167 | 0.0311   | 0.018105 | 1886 |
| GSE22601_IMMATURE_CD4_SINGLE_POSITIVE_VS_DOU<br>BLE_POSITIVE_THYMOCYTE_UP | 138 | 0.42916 | 1.502142 | 0.010174 | 0.031104 | 0.018107 | 1420 |
| GSE45365_CD8A_DC_VS_CD11B_DC_UP                                           | 160 | 0.42101 | 1.50378  | 0.01023  | 0.031242 | 0.018187 | 1704 |
| GSE15930_NAIVE_VS_48H_IN_VITRO_STIM_CD8_TCELL<br>_DN                      | 164 | -0.3129 | -1.34345 | 0.010238 | 0.031242 | 0.018187 | 3839 |
| GSE17721_POLYIC_VS_PAM3CSK4_2H_BMDC_DN                                    | 174 | 0.39788 | 1.437821 | 0.010238 | 0.031242 | 0.018187 | 2621 |
| GSE23321_CD8_STEM_CELL_MEMORY_VS_EFFECTOR_<br>MEMORY_CD8_TCELL_DN         | 161 | 0.41153 | 1.468129 | 0.010269 | 0.031297 | 0.018219 | 1712 |

|                                                                                 |     |         |          |          |          |          |      |
|---------------------------------------------------------------------------------|-----|---------|----------|----------|----------|----------|------|
| GSE30962_ACUTE_VS_CHRONIC_LCMV_SECONDARY_I<br>NF_CD8_TCELL_UP                   | 158 | 0.41799 | 1.487544 | 0.010269 | 0.031297 | 0.018219 | 2276 |
| GSE9650_EXHAUSTED_VS_MEMORY_CD8_TCELL_DN                                        | 154 | 0.41732 | 1.485734 | 0.010353 | 0.031534 | 0.018357 | 2065 |
| GSE8621_UNSTIM_VS_LPS_PRIMED_AND_LPS_STIM_MA<br>CROPHAGE_DN                     | 151 | 0.42172 | 1.493916 | 0.010374 | 0.031576 | 0.018382 | 2795 |
| GSE19941_LPS_VS_LPS_AND_IL10_STIM_IL10_KO_NFKB<br>P50_KO_MACROPHAGE_DN          | 160 | 0.41961 | 1.498794 | 0.010418 | 0.031692 | 0.018449 | 2881 |
| GSE3337_CTRL_VS_16H_IFNG_IN_CD8POS_DC_DN                                        | 157 | 0.42214 | 1.503527 | 0.010458 | 0.031789 | 0.018505 | 2104 |
| GSE6566_STRONG_VS_WEAK_DC_STIMULATED_CD4_T<br>CELL_DN                           | 128 | 0.43232 | 1.503152 | 0.010463 | 0.031789 | 0.018505 | 2208 |
| GSE17721_LPS_VS_CPG_4H_BMDC_UP                                                  | 176 | 0.39718 | 1.438812 | 0.010568 | 0.032089 | 0.01868  | 2347 |
| GSE19923_WT_VS_E2A_KO_DP_THYMOCYTE_UP                                           | 165 | 0.40246 | 1.441519 | 0.010619 | 0.032212 | 0.018752 | 1477 |
| GSE45837_WT_VS_GFII1_KO_PDC_DN                                                  | 167 | -0.3135 | -1.34687 | 0.010622 | 0.032212 | 0.018752 | 3197 |
| GSE17721_LPS_VS_CPG_16H_BMDC_UP                                                 | 162 | 0.41335 | 1.473905 | 0.010686 | 0.032368 | 0.018843 | 1981 |
| GSE7568_IL4_TGFB_DEXAMETHASONE_VS_IL4_TGFB_T<br>REATED_MACROPHAGE_DN            | 139 | 0.42921 | 1.504801 | 0.010686 | 0.032368 | 0.018843 | 2101 |
| GSE9509_LPS_VS_LPS_AND_IL10_STIM_IL10_KO_MACR<br>OPHAGE_20MIN_DN                | 150 | 0.42334 | 1.496434 | 0.010837 | 0.032797 | 0.019092 | 2046 |
| GSE1432_6H_VS_24H_IFNG_MICROGLIA_UP                                             | 159 | 0.4216  | 1.501758 | 0.010848 | 0.032797 | 0.019092 | 1729 |
| GSE32423_IL7_VS_IL7_IL4_NAIVE_CD8_TCELL_UP                                      | 156 | 0.40413 | 1.438412 | 0.010848 | 0.032797 | 0.019092 | 778  |
| GSE13522_CTRL_VS_T_CRUZI_G_STRAIN_INF_SKIN_UP                                   | 167 | 0.40474 | 1.455652 | 0.010872 | 0.03285  | 0.019123 | 2598 |
| GSE11057_CD4_EFF_MEM_VS_PBMC_UP                                                 | 157 | 0.42119 | 1.500126 | 0.011023 | 0.033285 | 0.019376 | 1894 |
| GSE18893_TCONV_VS_TREG_24H_CULTURE_UP                                           | 168 | 0.40593 | 1.460772 | 0.011044 | 0.033329 | 0.019402 | 1622 |
| GSE37534_GW1929_VS_PIOGLITAZONE_TREATED_CD4_<br>TCELL_PPARG1_FOXP3_TRANSDUCE_DN | 162 | 0.41264 | 1.471383 | 0.011065 | 0.03335  | 0.019414 | 1999 |
| GSE3982_BCELL_VS_NKCELL_UP                                                      | 162 | 0.41273 | 1.471714 | 0.011065 | 0.03335  | 0.019414 | 1785 |
| GSE33425_CD161_INT_VS_NEG_CD8_TCELL_UP                                          | 163 | 0.4104  | 1.463562 | 0.011079 | 0.033371 | 0.019427 | 3047 |
| GSE24142_DN2_VS_DN3_THYMOCYTE_DN                                                | 170 | 0.40159 | 1.443519 | 0.011086 | 0.033372 | 0.019427 | 2060 |
| GSE17721_CPG_VS_GARDIQUIMOD_24H_BMDC_DN                                         | 170 | 0.40141 | 1.44287  | 0.011272 | 0.033912 | 0.019741 | 1921 |
| GSE37605_C57BL6_VS_NOD_FOXP3_IRES_GFP_TCONV_<br>UP                              | 114 | 0.43922 | 1.511589 | 0.011471 | 0.034489 | 0.020077 | 1407 |
| GSE25088_WT_VS_STAT6_KO_MACROPHAGE_UP                                           | 138 | -0.3276 | -1.37288 | 0.011513 | 0.034596 | 0.020139 | 2771 |
| GSE41867_NAIVE_VS_DAY6_LCMV_EFFECTOR_CD8_TC<br>ELL_DN                           | 155 | 0.41323 | 1.47023  | 0.011544 | 0.034668 | 0.020182 | 2010 |

|                                                                            |     |         |          |          |          |          |      |
|----------------------------------------------------------------------------|-----|---------|----------|----------|----------|----------|------|
| GSE17186_BLOOD_VS_CORD_BLOOD_CD21HIGH_TRANSITIONAL_BCELL_UP                | 164 | 0.40694 | 1.454878 | 0.011588 | 0.034736 | 0.020221 | 2829 |
| GSE22229_RENAL_TRANSPLANT_IMMUNOSUPP_THERAPY_VS_HEALTHY_PBMC_DN            | 164 | 0.40756 | 1.457059 | 0.011588 | 0.034736 | 0.020221 | 2350 |
| GSE43863_NAIVE_VS_MEMORY_TFH_CD4_TCELL_D150_LCMV_DN                        | 164 | 0.40694 | 1.454876 | 0.011588 | 0.034736 | 0.020221 | 1933 |
| GSE40274_CTRL_VS_IRF4_TRANSDUCE_ACTIVATED_CD4_TCELL_DN                     | 137 | 0.42799 | 1.493472 | 0.011636 | 0.034859 | 0.020293 | 2297 |
| GSE19941_UNSTIM_VS_LPS_STIM_IL10_KO_MACROPHAGE_UP                          | 148 | 0.43035 | 1.514495 | 0.011679 | 0.034966 | 0.020355 | 2559 |
| GSE46606_UNSTIM_VS_CD40L_IL2_IL5_3DAY_STIMULATED_IRF4_KO_BCELL_UP          | 120 | -0.3457 | -1.41659 | 0.011699 | 0.035006 | 0.020378 | 3490 |
| GSE39916_B_CELL_SPLEEN_VS_PLASMA_CELL_BONE_MARROW_UP                       | 150 | 0.42108 | 1.488459 | 0.011796 | 0.035273 | 0.020534 | 2391 |
| GSE13522_WT_VS_IFNG_KO_SKIN_DN                                             | 96  | 0.45977 | 1.539056 | 0.012022 | 0.035914 | 0.020907 | 2741 |
| GSE22935_WT_VS_MYD88_KO_MACROPHAGE_24H_MBOVIS_BCG_STIM_DN                  | 163 | 0.40781 | 1.454332 | 0.012025 | 0.035914 | 0.020907 | 2069 |
| GSE17721_12H_VS_24H_CPG_BMDC_UP                                            | 169 | 0.39857 | 1.432887 | 0.012032 | 0.035914 | 0.020907 | 1792 |
| GSE3920_UNTREATED_VS_IFNG_TREATED_ENDOTHELIAL_CELL_UP                      | 126 | 0.42463 | 1.472426 | 0.012122 | 0.036161 | 0.021051 | 1675 |
| GSE15324_ELF4_KO_VS_WT_NAIVE_CD8_TCELL_UP                                  | 150 | 0.41956 | 1.483072 | 0.01218  | 0.03631  | 0.021137 | 1959 |
| GSE21360_SECONDARY_VS_TERTIARY_MEMORY_CD8_TCELL_DN                         | 133 | 0.43044 | 1.507353 | 0.012242 | 0.036475 | 0.021233 | 1640 |
| GSE17322_CD103_POS_VS_CD11B_HIGH_LUNG_DC_DN                                | 154 | -0.3269 | -1.38115 | 0.012314 | 0.036667 | 0.021345 | 2790 |
| GSE27786_NKCELL_VS_NKTCELL_UP                                              | 167 | 0.40155 | 1.444177 | 0.012359 | 0.036778 | 0.02141  | 2249 |
| GSE2405_HEAT_KILLED_LYSATE_VS_LIVE_A_PHAGOCYTOPHILUM_STIM_NEUTROPHIL_9H_DN | 160 | 0.41671 | 1.488407 | 0.012671 | 0.037683 | 0.021936 | 2199 |
| GSE36888_UNTREATED_VS_IL2_TREATED_TCELL_2H_UP                              | 153 | 0.41862 | 1.485446 | 0.012719 | 0.037802 | 0.022006 | 2022 |
| GSE3982_MAC_VS_EFF_MEMORY_CD4_TCELL_DN                                     | 150 | 0.41874 | 1.480159 | 0.012755 | 0.037888 | 0.022056 | 2139 |
| GSE39820_CTRL_VS_TGFBETA1_IL6_CD4_TCELL_DN                                 | 166 | 0.41116 | 1.47562  | 0.012778 | 0.037934 | 0.022083 | 2240 |
| GSE27786_BCELL_VS_NKTCELL_DN                                               | 153 | 0.41801 | 1.483288 | 0.012907 | 0.038293 | 0.022292 | 1808 |
| GSE17186_CD21LOW_VS_CD21HIGH_TRANSITIONAL_BCELL_UP                         | 156 | 0.40254 | 1.43275  | 0.012923 | 0.038295 | 0.022293 | 2140 |
| GSE22935_UNSTIM_VS_24H_MBOVIS_BCG_STIM_MYD88_KO_MACROPHAGE_DN              | 159 | 0.41861 | 1.491098 | 0.012923 | 0.038295 | 0.022293 | 1720 |

|                                                                    |     |         |          |          |          |          |      |
|--------------------------------------------------------------------|-----|---------|----------|----------|----------|----------|------|
| GSE15733_BM_VS_SPLEEN_MEMORY_CD4_TCELL_DN                          | 169 | 0.39716 | 1.4278   | 0.012965 | 0.038395 | 0.022351 | 2460 |
| GSE17721_LPS_VS_CPG_12H_BMDC_DN                                    | 164 | 0.40436 | 1.445648 | 0.013095 | 0.038735 | 0.022549 | 2060 |
| GSE7460_CD8_TCELL_VS_TREG_ACT_UP                                   | 158 | 0.4131  | 1.470121 | 0.013095 | 0.038735 | 0.022549 | 1308 |
| GSE21063_3H_VS_16H_ANTI_IGM_STIM_NFATC1_KOBC<br>ELL_UP             | 166 | 0.41071 | 1.473993 | 0.013151 | 0.038877 | 0.022632 | 3205 |
| GSE2770_UNTREATED_VS_TGFB_AND_IL4_TREATED_A<br>CT_CD4_TCELL_2H_DN  | 152 | 0.41739 | 1.479086 | 0.013178 | 0.038934 | 0.022665 | 2237 |
| GSE22443_NAIVE_VS_ACT_AND_IL2_TREATED_CD8_TC<br>ELL_DN             | 160 | 0.41535 | 1.483547 | 0.013234 | 0.039074 | 0.022746 | 2271 |
| GSE29615_DAY3_VS_DAY7_LAIV_FLU_VACCINE_PBM<br>C_DN                 | 134 | 0.42164 | 1.473779 | 0.013469 | 0.039744 | 0.023136 | 2182 |
| GSE21546_WT_VS_SAPIA_KO_ANTI_CD3_STIM_DP_THY<br>MOCYTES_UP         | 162 | 0.40823 | 1.455657 | 0.013523 | 0.039881 | 0.023216 | 2047 |
| GSE4984_UNTREATED_VS_GALECTIN1_TREATED_DC_D<br>N                   | 142 | 0.42073 | 1.477997 | 0.013574 | 0.040008 | 0.02329  | 1899 |
| GSE16697_CD4_TCELL_VS_TFH_CD4_TCELL_UP                             | 160 | 0.41499 | 1.482262 | 0.013609 | 0.040087 | 0.023336 | 2704 |
| GSE15930_NAIVE_VS_48H_IN_VITRO_STIM_IFNAB_CD8_<br>TCELL_DN         | 160 | -0.3182 | -1.35681 | 0.01364  | 0.040153 | 0.023374 | 3658 |
| GSE21927_C26GM_VS_4T1_TUMOR_MONOCYTE_BALBC<br>_UP                  | 156 | 0.40094 | 1.427061 | 0.013678 | 0.040241 | 0.023425 | 2231 |
| GSE14699_NAIVE_VS_DELETIONAL_TOLERANCE_CD8_T<br>CELL_UP            | 126 | 0.42181 | 1.462648 | 0.013699 | 0.04027  | 0.023443 | 2053 |
| GSE13306_TREG_VS_TCONV_SPLEEN_UP                                   | 162 | 0.40749 | 1.453009 | 0.013712 | 0.04027  | 0.023443 | 2135 |
| GSE17721_POLYIC_VS_CPG_1H_BMDC_DN                                  | 162 | 0.40785 | 1.454312 | 0.013712 | 0.04027  | 0.023443 | 2068 |
| GSE36476_YOUNG_VS_OLD_DONOR_MEMORY_CD4_TC<br>ELL_72H_TSST_ACT_UP   | 160 | 0.41466 | 1.481104 | 0.013797 | 0.040494 | 0.023573 | 1272 |
| GSE45739_NRAS_KO_VS_WT_UNSTIM_CD4_TCELL_DN                         | 145 | 0.41545 | 1.463352 | 0.013906 | 0.040789 | 0.023745 | 3037 |
| GSE21927_SPLEEN_VS_TUMOR_MONOCYTE_C57BL6_UP                        | 133 | 0.42824 | 1.499639 | 0.013978 | 0.040972 | 0.023851 | 1218 |
| GSE17301_IFNA2_VS_IFNA5_STIM_ACD3_ACD28_ACT_C<br>D8_TCELL_UP       | 160 | 0.41414 | 1.479238 | 0.013985 | 0.040972 | 0.023851 | 2274 |
| GSE46606_IRF4HIGH_VS_WT_CD40L_IL2_IL5_DAY1_STI<br>MULATED_BCELL_DN | 168 | 0.40106 | 1.443249 | 0.014014 | 0.041034 | 0.023887 | 2285 |
| GSE17721_CTRL_VS_POLYIC_8H_BMDC_DN                                 | 177 | 0.40355 | 1.464543 | 0.014174 | 0.041478 | 0.024146 | 2034 |
| GSE339_EX_VIVO_VS_IN_CULTURE_CD4CD8DN_DC_DN                        | 165 | 0.39763 | 1.424209 | 0.01419  | 0.0415   | 0.024158 | 2028 |

|                                                                   |     |         |          |          |          |          |      |
|-------------------------------------------------------------------|-----|---------|----------|----------|----------|----------|------|
| GSE43863_TH1_VS_LY6C_INT_CXCR5POS_EFFECTOR_CD4_TCELL_DN           | 153 | 0.41666 | 1.478493 | 0.014226 | 0.04158  | 0.024205 | 2971 |
| GSE30083_SP1_VS_SP3_THYMOCYTE_UP                                  | 156 | 0.40011 | 1.424107 | 0.014244 | 0.041583 | 0.024207 | 2490 |
| GSE3982_MEMORY_CD4_TCELL_VS_TH1_DN                                | 173 | 0.39664 | 1.433714 | 0.014244 | 0.041583 | 0.024207 | 3577 |
| GSE10240_CTRL_VS_IL17_STIM_PRIMARY_BRONCHIAL_EPITHELIAL_CELLS_DN  | 149 | 0.41992 | 1.484352 | 0.014253 | 0.041584 | 0.024208 | 1159 |
| GSE2585_CTEC_VS_THYMIC_MACROPHAGE_UP                              | 152 | 0.41344 | 1.465102 | 0.014316 | 0.041744 | 0.024301 | 2017 |
| GSE17721_LPS_VS_PAM3CSK4_12H_BMDC_UP                              | 164 | 0.40294 | 1.440567 | 0.014414 | 0.041981 | 0.024438 | 2398 |
| GSE37605_C57BL6_VS_NOD_FOXP3_IRES_GFP_TREG_DN                     | 164 | 0.40287 | 1.440299 | 0.014414 | 0.041981 | 0.024438 | 2037 |
| GSE17974_CTRL_VS_ACT_IL4_AND_ANTI_IL12_2H_CD4_TCELL_UP            | 134 | 0.41891 | 1.464247 | 0.014438 | 0.042023 | 0.024463 | 1666 |
| GSE17721_LPS_VS_CPG_8H_BMDC_UP                                    | 164 | 0.40259 | 1.439301 | 0.014603 | 0.042479 | 0.024729 | 2381 |
| GSE2770_IL12_AND_TGFB_ACT_VS_ACT_CD4_TCELL_48H_UP                 | 149 | 0.41932 | 1.482233 | 0.014636 | 0.042549 | 0.024769 | 2034 |
| GSE30971_WBP7_HET_VS_KO_MACROPHAGE_UP                             | 150 | 0.41665 | 1.472772 | 0.014673 | 0.042633 | 0.024818 | 2013 |
| GSE26030_UNSTIM_VS_RESTIM_TH1_DAY15_POST_POLARIZATION_UP          | 165 | 0.39699 | 1.421916 | 0.014754 | 0.04284  | 0.024939 | 2799 |
| GSE36888_UNTREATED_VS_IL2_TREATED_STAT5_AB_KNOCKIN_TCELL_6H_DN    | 163 | -0.3121 | -1.33898 | 0.014762 | 0.04284  | 0.024939 | 2037 |
| GSE43863_TH1_VS_LY6C_INT_CXCR5POS_MEMORY_CD4_TCELL_UP             | 161 | 0.40476 | 1.443976 | 0.014791 | 0.0429   | 0.024974 | 1996 |
| GSE37416_CTRL_VS_12H_F_TULARENSIS_LVS_NEUTROPHIL_DN               | 156 | 0.39966 | 1.422513 | 0.01481  | 0.042929 | 0.024991 | 3349 |
| GSE1460_DP_THYMOCYTE_VS_NAIVE_CD4_TCELL_CORD_BLOOD_DN             | 154 | 0.41089 | 1.46284  | 0.01483  | 0.042938 | 0.024995 | 2451 |
| GSE43863_NAIVE_VS_MEMORY_LY6C_INT_CXCR5POS_CD4_TCELL_D150_LCMV_UP | 166 | 0.40827 | 1.46523  | 0.01483  | 0.042938 | 0.024995 | 2291 |
| GSE7460_WT_VS_FOXP3_HET_ACT_WITH_TGFB_TCONV_DN                    | 150 | 0.41581 | 1.469824 | 0.014865 | 0.043013 | 0.025039 | 2808 |
| GSE17721_POLYIC_VS_GARDIQUIMOD_8H_BMDC_UP                         | 167 | 0.39627 | 1.425209 | 0.014961 | 0.043265 | 0.025186 | 2144 |
| GSE30083_SP1_VS_SP2_THYMOCYTE_UP                                  | 161 | 0.40372 | 1.440249 | 0.01498  | 0.043294 | 0.025203 | 1116 |
| GSE45365_HEALTHY_VS_MCMV_INFECTION_CD11B_DC_IFNAR_KO_DN           | 136 | 0.4199  | 1.469316 | 0.014999 | 0.043326 | 0.025221 | 2190 |
| GSE3982_MAC_VS_BCELL_DN                                           | 144 | 0.41685 | 1.468155 | 0.015018 | 0.043354 | 0.025238 | 2368 |
| GSE24210_IL35_TREATED_VS_RESTING_TREG_UP                          | 153 | 0.41481 | 1.471936 | 0.015168 | 0.04371  | 0.025445 | 2218 |

|                                                                                         |     |         |          |          |          |          |      |
|-----------------------------------------------------------------------------------------|-----|---------|----------|----------|----------|----------|------|
| GSE26290_WT_VS_PDK1_KO_ANTI_CD3_AND_IL2_STIM_CD8_TCELL_UP                               | 158 | 0.41031 | 1.4602   | 0.015168 | 0.04371  | 0.025445 | 2947 |
| GSE40273_XBP1_KO_VS_WT_TREG_DN                                                          | 153 | 0.41467 | 1.471422 | 0.015168 | 0.04371  | 0.025445 | 2053 |
| GSE13306_TREG_VS_TCONV_SPLEEN_DN                                                        | 156 | 0.39882 | 1.419513 | 0.015187 | 0.043714 | 0.025447 | 2095 |
| GSE30962_ACUTE_VS_CHRONIC_LCMV_SECONDARY_I_NF_CD8_TCELL_DN                              | 159 | 0.4141  | 1.475028 | 0.015187 | 0.043714 | 0.025447 | 2485 |
| GSE30153_LUPUS_VS_HEALTHY_DONOR_BCELL_DN                                                | 146 | 0.41    | 1.447858 | 0.015209 | 0.043753 | 0.02547  | 1692 |
| GSE20366_CD103_KLRG1_DP_VS_DN_TREG_DN                                                   | 162 | 0.40615 | 1.448248 | 0.015226 | 0.043758 | 0.025473 | 2675 |
| GSE23114_PERITONEAL_CAVITY_B1A_BCELL_VS_SPLEEN_BCELL_IN_SLE2C1_MOUSE_DN                 | 143 | 0.41922 | 1.475916 | 0.015229 | 0.043758 | 0.025473 | 2013 |
| GSE12198_CTRL_VS_LOW_IL2_STIM_NK_CELL_UP                                                | 168 | 0.39972 | 1.438416 | 0.015313 | 0.043962 | 0.025592 | 1951 |
| GSE17721_CPG_VS_GARDIQUIMOD_IH_BMDC_UP                                                  | 165 | 0.39584 | 1.417806 | 0.015318 | 0.043962 | 0.025592 | 2170 |
| GSE24671_CTRL_VS_BAKIMULC_INFECTED_MOUSE_SPLENOCYTES_UP                                 | 161 | 0.40299 | 1.437662 | 0.015356 | 0.044047 | 0.025641 | 1816 |
| GSE32986_CURDLAN_LOWDOSE_VS_GMCSF_AND_CURDLAN_LOWDOSE_STIM_DC_DN                        | 159 | 0.41363 | 1.473356 | 0.015376 | 0.044077 | 0.025659 | 2871 |
| GSE360_CTRL_VS_T_GONDII_DC_UP                                                           | 166 | 0.40683 | 1.46009  | 0.01539  | 0.044091 | 0.025667 | 2256 |
| GSE45365_NK_CELL_VS_BCELL_MCMV_INFECTION_DN                                             | 151 | 0.4125  | 1.461275 | 0.015513 | 0.044417 | 0.025857 | 2021 |
| GSE27241_WT_CTRL_VS_DIGOXIN_TREATED_RORGT_KO_CD4_TCELL_IN_TH17_POLARIZING_CONDITIONS_UP | 141 | 0.4263  | 1.499483 | 0.015612 | 0.044676 | 0.026007 | 3002 |
| GSE3982_BCELL_VS_TH2_DN                                                                 | 165 | 0.39462 | 1.413421 | 0.015694 | 0.044884 | 0.026128 | 1638 |
| GSE14415_FOXP3_KO_NATURAL_TREG_VS_TCONV_UP                                              | 145 | 0.41137 | 1.448962 | 0.015824 | 0.045229 | 0.02633  | 2038 |
| GSE3920_IFNA_VS_IFNG_TREATED_ENDOTHELIAL_CELL_UP                                        | 135 | 0.41425 | 1.448034 | 0.015988 | 0.045672 | 0.026587 | 1913 |
| GSE9601_UNTREATED_VS_NFKB_INHIBITOR_TREATED_HCMV_INF_MONOCYTE_UP                        | 131 | 0.43007 | 1.49943  | 0.016071 | 0.045883 | 0.02671  | 2087 |
| GSE25087_FETAL_VS_ADULT_TCONV_UP                                                        | 153 | 0.41314 | 1.465994 | 0.01611  | 0.045968 | 0.026759 | 2542 |
| GSE22432_CDC_VS_COMMON_DC_PROGENITOR_UP                                                 | 159 | 0.41243 | 1.469066 | 0.01613  | 0.045972 | 0.026762 | 3005 |
| GSE40068_BCL6_POS_VS_NEG_CXCR5_POS_TFH_DN                                               | 159 | 0.4125  | 1.469323 | 0.01613  | 0.045972 | 0.026762 | 2672 |
| GSE37532_WT_VS_PPARG_KO_LN_TREG_DN                                                      | 86  | 0.45678 | 1.504212 | 0.016226 | 0.046218 | 0.026905 | 852  |
| GSE28737_WT_VS_BCL6_KO_FOLLICULAR_BCELL_UP                                              | 161 | 0.40172 | 1.433106 | 0.016299 | 0.046328 | 0.026969 | 1771 |
| GSE40666_UNTREATED_VS_IFNA_STIM_STAT4_KO_EFFECTOR_CD8_TCELL_90MIN_UP                    | 157 | 0.41164 | 1.466113 | 0.016299 | 0.046328 | 0.026969 | 2005 |
| GSE40666_WT_VS_STAT1_KO_CD8_TCELL_WITH_IFNA_STIM_90MIN_UP                               | 157 | 0.41174 | 1.466467 | 0.016299 | 0.046328 | 0.026969 | 1896 |

|                                                                         |     |         |          |          |          |          |      |
|-------------------------------------------------------------------------|-----|---------|----------|----------|----------|----------|------|
| GSE9650_EFFECTOR_VS_MEMORY_CD8_TCELL_UP                                 | 170 | 0.39545 | 1.421449 | 0.016302 | 0.046328 | 0.026969 | 1042 |
| GSE29949_CD8_POS_DC_SPLEEN_VS_MONOCYTE_BONE_MARROW_UP                   | 147 | 0.41727 | 1.471847 | 0.016378 | 0.046517 | 0.027079 | 1740 |
| GSE40274_CTRL_VS_FOXP3_AND_IRF4_TRANSDUCE_ACTIVATED_CD4_TCELL_UP        | 130 | 0.41295 | 1.441688 | 0.016418 | 0.046603 | 0.027129 | 2073 |
| GSE20366_EX_VIVO_VS_DEC205_CONVERSION_DN                                | 151 | 0.41149 | 1.457676 | 0.016464 | 0.046681 | 0.027174 | 2140 |
| GSE21670_UNTREATED_VS_IL6_TREATED_CD4_TCELL_DN                          | 151 | 0.41166 | 1.458273 | 0.016464 | 0.046681 | 0.027174 | 2050 |
| GSE46606_DAY1_VS_DAY3_CD40L_IL2_IL5_STIMULATE_D_BCELL_UP                | 128 | 0.42577 | 1.480401 | 0.016525 | 0.046826 | 0.027259 | 1197 |
| GSE22886_DC_VS_MONOCYTE_UP                                              | 168 | 0.3989  | 1.435463 | 0.016613 | 0.047047 | 0.027388 | 1424 |
| GSE13229_IMM_VS_INTMATURE_NKCELL_DN                                     | 165 | 0.39384 | 1.410659 | 0.016633 | 0.047052 | 0.02739  | 2409 |
| GSE22229_RENAL_TRANSPLANT_IMMUNOSUPP_THERAPY_VS_HEALTHY_PBMC_UP         | 165 | 0.39396 | 1.411086 | 0.016633 | 0.047052 | 0.02739  | 2325 |
| GSE5589_WT_VS_IL6_KO_LPS_AND_IL10_STIM_MACROPHAGE_45MIN_DN              | 162 | 0.40363 | 1.439243 | 0.016739 | 0.047322 | 0.027548 | 2477 |
| GSE21546_SAP1A_KO_VS_SAP1A_KO_AND_ELK1_KO_DP_THYMOCYTES_UP              | 155 | 0.40434 | 1.438576 | 0.0168   | 0.047442 | 0.027618 | 2763 |
| GSE5455_HEALTHY_VS_TUMOR_BEARING_MOUSE_SPLEEN_MONOCYTE_DN               | 160 | 0.41001 | 1.464478 | 0.0168   | 0.047442 | 0.027618 | 2077 |
| GSE28408_LY6G_POS_VS_NEG_DC_UP                                          | 161 | 0.40097 | 1.430444 | 0.016864 | 0.047594 | 0.027706 | 2202 |
| GSE37301_MULTIPOTENT_PROGENITOR_VS_GRANULOCYTES_PROGENITOR_UP           | 159 | 0.41183 | 1.466933 | 0.016885 | 0.047618 | 0.02772  | 2484 |
| GSE45365_WT_VS_IFNAR_KO_CD11B_DC_MCMV_INFECTION_UP                      | 155 | -0.3207 | -1.35561 | 0.016892 | 0.047618 | 0.02772  | 4086 |
| GSE23505_IL6_IL1_VS_IL6_IL1_TGFB_TREATED_CD4_TCELL_DN                   | 162 | -0.3176 | -1.35842 | 0.016938 | 0.047721 | 0.02778  | 3654 |
| GSE18281_PERIMEDULLARY_CORTICAL_REGION_VS_WHITE_MATTER_CORTEX_THYMUS_DN | 143 | 0.41634 | 1.465776 | 0.016953 | 0.047736 | 0.027789 | 1475 |
| GSE22886_IGG_IGA_MEMORY_BCELL_VS_BLOOD_PLASMA_CELL_UP                   | 156 | 0.39571 | 1.408435 | 0.017074 | 0.048021 | 0.027955 | 2102 |
| GSE6259_BCELL_VS_CD4_TCELL_DN                                           | 156 | 0.39612 | 1.409911 | 0.017074 | 0.048021 | 0.027955 | 2973 |
| GSE13738_RESTING_VS_TCR_ACTIVATED_CD4_TCELL_UP                          | 124 | -0.3326 | -1.37567 | 0.017142 | 0.048165 | 0.028039 | 2425 |

|                                                                               |     |         |          |          |          |          |      |
|-------------------------------------------------------------------------------|-----|---------|----------|----------|----------|----------|------|
| GSE5099_DAY3_VS_DAY7_MCSF_TREATED_MACROPHAGE_UP                               | 147 | 0.41532 | 1.464993 | 0.017144 | 0.048165 | 0.028039 | 1464 |
| GSE17721_LPS_VS_GARDIQUIMOD_8H_BMDC_DN                                        | 162 | 0.40317 | 1.437604 | 0.017306 | 0.048563 | 0.02827  | 1806 |
| GSE43955_10H_VS_30H_ACT_CD4_TCELL_DN                                          | 162 | 0.403   | 1.437003 | 0.017306 | 0.048563 | 0.02827  | 1315 |
| GSE37532_TREG_VS_TCONV_PPARG_KO_CD4_TCELL_F<br>ROM_VISCERAL_ADIPOSE_TISSUE_DN | 168 | 0.39777 | 1.431408 | 0.017355 | 0.048674 | 0.028335 | 2357 |
| GSE16385_UNTREATED_VS_12H_ROSIGLITAZONE_TREA<br>TED_MACROPHAGE_UP             | 124 | 0.42118 | 1.458839 | 0.017398 | 0.048767 | 0.028389 | 1433 |
| GSE15330_HSC_VS_MEGAKARYOCYTE_ERYTHROID_PR<br>OGENITOR_UP                     | 142 | 0.41467 | 1.456701 | 0.017425 | 0.048797 | 0.028407 | 2035 |
| GSE20366_CD103_POS_VS_NEG_TREG_KLRG1NEG_DN                                    | 157 | 0.4102  | 1.460999 | 0.017429 | 0.048797 | 0.028407 | 2282 |
| GSE36392_TYPE_2_MYELOID_VS_MAC_IL25_TREATED_<br>LUNG_UP                       | 154 | 0.40785 | 1.452022 | 0.017442 | 0.048805 | 0.028411 | 1628 |
| GSE36476_CTRL_VS_TSST_ACT_16H_MEMORY_CD4_TC<br>ELL_OLD_UP                     | 162 | 0.40289 | 1.436625 | 0.017495 | 0.048927 | 0.028482 | 1143 |
| GSE24634_IL4_VS_CTRL_TREATED_NAIVE_CD4_TCELL_<br>DAY7_UP                      | 163 | 0.39978 | 1.425699 | 0.017517 | 0.048961 | 0.028502 | 1418 |
| GSE5589_LPS_AND_IL10_VS_LPS_AND_IL6_STIM_IL10_K<br>O_MACROPHAGE_45MIN_DN      | 160 | 0.40904 | 1.461021 | 0.017551 | 0.049028 | 0.028541 | 2743 |
| GSE14350_IL2RB_KO_VS_WT_TEFF_UP                                               | 149 | 0.4139  | 1.463081 | 0.017697 | 0.049378 | 0.028744 | 1756 |
| GSE7831_1H_VS_4H_INFLUENZA_STIM_PDC_DN                                        | 149 | 0.41381 | 1.462766 | 0.017697 | 0.049378 | 0.028744 | 1621 |
| GSE45365_WT_VS_IFNAR_KO_CD8A_DC_MCMV_INFECT<br>ION_UP                         | 160 | 0.40877 | 1.460059 | 0.017739 | 0.049468 | 0.028797 | 2377 |
| GSE22443_NAIVE_VS_ACT_AND_IL2_TREATED_CD8_TC<br>ELL_UP                        | 165 | 0.39245 | 1.405651 | 0.017761 | 0.049502 | 0.028817 | 1491 |
| GSE23398_WT_VS_IL2_KO_CD4_TCELL_SCURFY_MOUS<br>E_UP                           | 152 | 0.40784 | 1.445262 | 0.017919 | 0.049913 | 0.029056 | 1685 |

**Table S3. Gene Set Enrichment Analysis of CD Related Genes based on KEGG database**

| ID                                                 | Description | setSize | enrichment | NES      | pvalue   | p.adjust | qvalues  | rank |
|----------------------------------------------------|-------------|---------|------------|----------|----------|----------|----------|------|
| KEGG_KEGG_CHEMOKINE_SIGNALING_PATHWAY              |             | 154     | 0.727131   | 2.593778 | 1.00E-10 | 6.03E-09 | 4.25E-09 | 1433 |
| KEGG_KEGG_CYTOKINE_CYTOKINE_RECEPTOR_INTERACTION   |             | 224     | 0.695624   | 2.57591  | 1.00E-10 | 6.03E-09 | 4.25E-09 | 1477 |
| KEGG_KEGG_LEISHMANIA_INFECTION                     |             | 51      | 0.793382   | 2.386832 | 1.00E-10 | 6.03E-09 | 4.25E-09 | 1240 |
| KEGG_KEGG_TOLL_LIKE_RECEPTOR_SIGNALING_PATHWAY     |             | 85      | 0.670061   | 2.212459 | 3.46E-09 | 1.56E-07 | 1.10E-07 | 910  |
| KEGG_KEGG_INTESTINAL_IMMUNE_NETWORK_FOR_IGA_PROD   |             | 38      | 0.796733   | 2.284697 | 7.45E-09 | 2.70E-07 | 1.90E-07 | 1087 |
| KEGG_KEGG_NOD_LIKE_RECEPTOR_SIGNALING_PATHWAY      |             | 51      | 0.740115   | 2.22658  | 2.31E-08 | 6.96E-07 | 4.90E-07 | 1534 |
| KEGG_KEGG_SYSTEMIC_LUPUS_ERYTHEMATOSUS             |             | 36      | 0.792119   | 2.242403 | 3.15E-08 | 8.15E-07 | 5.74E-07 | 1313 |
| KEGG_KEGG_COMPLEMENT_AND_COAGULATION_CASCADES      |             | 58      | 0.713917   | 2.195299 | 8.67E-08 | 1.96E-06 | 1.38E-06 | 1240 |
| KEGG_KEGG_OXIDATIVE_PHOSPHORYLATION                |             | 93      | -0.55017   | -2.18157 | 1.02E-07 | 2.04E-06 | 1.44E-06 | 3141 |
| KEGG_KEGG_HUNTINGTONS_DISEASE                      |             | 140     | -0.48673   | -2.09618 | 1.40E-07 | 2.53E-06 | 1.78E-06 | 2922 |
| KEGG_KEGG_ALZHEIMERS_DISEASE                       |             | 127     | -0.48501   | -2.03405 | 2.47E-07 | 4.06E-06 | 2.85E-06 | 3048 |
| KEGG_KEGG_CELL_ADHESION_MOLECULES_CAMS             |             | 105     | 0.594189   | 2.013713 | 1.00E-06 | 1.51E-05 | 1.06E-05 | 1393 |
| KEGG_KEGG_PARKINSONS_DISEASE                       |             | 90      | -0.52446   | -2.05608 | 2.17E-06 | 3.02E-05 | 2.13E-05 | 2922 |
| KEGG_KEGG_ASTHMA                                   |             | 19      | 0.831808   | 2.117064 | 3.63E-06 | 4.70E-05 | 3.30E-05 | 764  |
| KEGG_KEGG_HEMATOPOIETIC_CELL_LINEAGE               |             | 73      | 0.636089   | 2.052313 | 5.00E-06 | 5.91E-05 | 4.16E-05 | 2339 |
| KEGG_KEGG_BUTANOATE_METABOLISM                     |             | 28      | -0.70559   | -2.20417 | 5.23E-06 | 5.91E-05 | 4.16E-05 | 1452 |
| KEGG_KEGG_CITRATE_CYCLE_TCA_CYCLE                  |             | 27      | -0.72247   | -2.23698 | 7.38E-06 | 7.85E-05 | 5.53E-05 | 2459 |
| KEGG_KEGG_TYPE_I_DIABETES_MELLITUS                 |             | 25      | 0.784719   | 2.120342 | 7.86E-06 | 7.90E-05 | 5.56E-05 | 998  |
| KEGG_KEGG_VIRAL_MYOCARDITIS                        |             | 50      | 0.656597   | 1.968365 | 1.27E-05 | 0.000121 | 8.52E-05 | 1076 |
| KEGG_KEGG_ALLOGRAFT_REJECTION                      |             | 23      | 0.776624   | 2.069013 | 2.09E-05 | 0.000189 | 0.000133 | 998  |
| KEGG_KEGG_GRAFT_VERSUS_HOST_DISEASE                |             | 21      | 0.802722   | 2.093788 | 3.45E-05 | 0.000297 | 0.000209 | 998  |
| KEGG_KEGG_VALINE_LEUCINE_AND_ISOLEUCINE_DEGRADATIC |             | 37      | -0.61761   | -2.05096 | 3.81E-05 | 0.000314 | 0.000221 | 2877 |
| KEGG_KEGG_NATURAL_KILLER_CELL_MEDIATED_CYTOTOXICIT |             | 99      | 0.561983   | 1.89148  | 4.86E-05 | 0.000383 | 0.000269 | 2540 |
| KEGG_KEGG_PATHWAYS_IN_CANCER                       |             | 280     | 0.429056   | 1.62865  | 0.000103 | 0.000774 | 0.000544 | 1325 |
| KEGG_KEGG_LEUKOCYTE_TRANSENDOTHELIAL_MIGRATION     |             | 95      | 0.554877   | 1.855411 | 0.000112 | 0.000814 | 0.000573 | 1358 |
| KEGG_KEGG_STARCH_AND_SUCROSE_METABOLISM            |             | 30      | -0.64977   | -2.07349 | 0.000131 | 0.000912 | 0.000642 | 1640 |
| KEGG_KEGG_ANTIGEN_PROCESSING_AND_PRESENTATION      |             | 48      | 0.639567   | 1.901178 | 0.000141 | 0.000945 | 0.000665 | 2315 |
| KEGG_KEGG_AUTOIMMUNE_THYROID_DISEASE               |             | 34      | 0.68844    | 1.92557  | 0.000209 | 0.001352 | 0.000951 | 1079 |
| KEGG_KEGG_ECM_RECEPTOR_INTERACTION                 |             | 68      | 0.577621   | 1.833095 | 0.000266 | 0.001662 | 0.00117  | 1732 |
| KEGG_KEGG_FOCAL_ADHESION                           |             | 169     | 0.450035   | 1.625635 | 0.000535 | 0.003229 | 0.002272 | 1872 |
| KEGG_KEGG_CARDIAC_MUSCLE_CONTRACTION               |             | 63      | -0.47994   | -1.75772 | 0.000716 | 0.004181 | 0.002942 | 3454 |
| KEGG_KEGG_JAK_STAT_SIGNALING_PATHWAY               |             | 133     | 0.487871   | 1.716122 | 0.000742 | 0.004197 | 0.002953 | 2179 |
| KEGG_KEGG_PYRUVATE_METABOLISM                      |             | 37      | -0.55134   | -1.83091 | 0.001004 | 0.005508 | 0.003876 | 2122 |
| KEGG_KEGG_PROXIMAL_TUBULE_BICARBONATE_RECLAMATIO   |             | 22      | -0.65717   | -1.93188 | 0.001126 | 0.005994 | 0.004218 | 1513 |
| KEGG_KEGG_PENTOSE_AND_GLUCURONATE_INTERCONVERSIO   |             | 14      | -0.70176   | -1.82272 | 0.001612 | 0.008337 | 0.005867 | 699  |
| KEGG_KEGG_ASCORBATE_AND_ALDARATE_METABOLISM        |             | 11      | -0.75575   | -1.80469 | 0.002712 | 0.013637 | 0.009596 | 291  |
| KEGG_KEGG_PROPANOATE_METABOLISM                    |             | 29      | -0.56746   | -1.78744 | 0.002821 | 0.0138   | 0.009711 | 2528 |
| KEGG_KEGG_BLADDER_CANCER                           |             | 37      | 0.60113    | 1.717148 | 0.003105 | 0.014791 | 0.010408 | 267  |
| KEGG_KEGG_DRUG_METABOLISM_CYTOCHROME_P450          |             | 49      | -0.4695    | -1.64898 | 0.003308 | 0.015353 | 0.010804 | 1061 |
| KEGG_KEGG_FC_EPSILON_RI_SIGNALING_PATHWAY          |             | 67      | 0.521442   | 1.651291 | 0.005067 | 0.022929 | 0.016135 | 1076 |
| KEGG_KEGG_CYTOSOLIC_DNA_SENSING_PATHWAY            |             | 37      | 0.574825   | 1.642009 | 0.006928 | 0.030586 | 0.021523 | 979  |
| KEGG_KEGG_GLYCOSAMINOGLYCAN_BIOSYNTHESIS_CHONDR    |             | 17      | 0.686      | 1.695888 | 0.008666 | 0.037344 | 0.026279 | 1968 |
| KEGG_KEGG_FATTY_ACID_METABOLISM                    |             | 35      | -0.48374   | -1.58338 | 0.00939  | 0.039525 | 0.027813 | 2401 |

**Table S4. Correlation analysis analysis between SLC6A14 and immune cell**

|       | gene    | path                           | r            | p           | sign  | absR        | rSeg | pSeg             |
|-------|---------|--------------------------------|--------------|-------------|-------|-------------|------|------------------|
| cor   | SLC6414 | Activated.B.cell               | 0.289198493  | 0.023788677 | pos   | 0.289198493 |      | 0.5 <0.05        |
| cor1  | SLC6414 | Activated.CD4.T.cell           | 0.559389308  | 2.78E-06    | pos   | 0.559389308 |      | 0.75 <0.001      |
| cor2  | SLC6414 | Activated.CD8.T.cell           | 0.42530732   | 0.000633548 | pos   | 0.42530732  |      | 0.5 <0.001       |
| cor3  | SLC6414 | Activated.dendritic.cell       | 0.711466872  | 1.31E-10    | pos   | 0.711466872 |      | 0.75 <0.001      |
| cor4  | SLC6414 | CD56bright.natural.killer.cell | 0.233876759  | 0.069662865 | pos   | 0.233876759 |      | 0.25 ns          |
| cor5  | SLC6414 | CD56dim.natural.killer.cell    | -0.431362037 | 0.000518906 | neg   | 0.431362037 |      | 0.5 <0.001       |
| cor6  | SLC6414 | Eosinophil                     | 0.31853271   | 0.012353091 | pos   | 0.31853271  |      | 0.5 <0.05        |
| cor7  | SLC6414 | Gamma.delta.T.cell             | 0.381700286  | 0.002402768 | pos   | 0.381700286 |      | 0.5 <0.01        |
| cor8  | SLC6414 | Immature.B.cell                | 0.371422458  | 0.003207679 | pos   | 0.371422458 |      | 0.5 <0.01        |
| cor9  | SLC6414 | Immature.dendritic.cell        | 0.630631543  | 5.12E-08    | pos   | 0.630631543 |      | 0.75 <0.001      |
| cor10 | SLC6414 | MDSC                           | 0.58559514   | 7.15E-07    | pos   | 0.58559514  |      | 0.75 <0.001      |
| cor11 | SLC6414 | Macrophage                     | 0.543848035  | 5.90E-06    | pos   | 0.543848035 |      | 0.75 <0.001      |
| cor12 | SLC6414 | Mast.cell                      | 0.573210146  | 1.38E-06    | pos   | 0.573210146 |      | 0.75 <0.001      |
| cor13 | SLC6414 | Monocyte                       | 0.436463688  | 0.000437304 | pos   | 0.436463688 |      | 0.5 <0.001       |
| cor14 | SLC6414 | Natural.killer.T.cell          | 0.399899101  | 0.001407693 | pos   | 0.399899101 |      | 0.5 <0.01        |
| cor15 | SLC6414 | Natural.killer.cell            | 0.559309585  | 2.79E-06    | pos   | 0.559309585 |      | 0.75 <0.001      |
| cor16 | SLC6414 | Neutrophil                     | 0.624394297  | 7.56E-08    | pos   | 0.624394297 |      | 0.75 <0.001      |
| cor17 | SLC6414 | Plasmacytoid.dendritic.cell    | 0.544952563  | 5.60E-06    | pos   | 0.544952563 |      | 0.75 <0.001      |
| cor18 | SLC6414 | Regulatory.T.cell              | 0.408348644  | 0.001086907 | pos   | 0.408348644 |      | 0.5 <0.01        |
| cor19 | SLC6414 | T.follicular.helper.cell       | 0.478109953  | 9.74E-05    | pos   | 0.478109953 |      | 0.5 <0.001       |
| cor20 | SLC6414 | Type.1.T.helper.cell           | 0.603489448  | 2.63E-07    | pos   | 0.603489448 |      | 0.75 <0.001      |
| cor21 | SLC6414 | Type.17.T.helper.cell          | -0.09189526  | 0.481202833 | neg   | 0.09189526  |      | 0.25 ns          |
| cor22 | SLC6414 | Type.2.T.helper.cell           | 0.667953049  | 4.09E-09    | pos   | 0.667953049 |      | 0.75 <0.001      |
| cor23 | SLC6414 | Effector.memory.CD4.T.cell     | 0.29245456   | 0.022187467 | pos   | 0.29245456  |      | 0.5 <0.05        |
| cor24 | SLC6414 | Memory.B.cell                  | 0.270105708  | 0.035269222 | pos   | 0.270105708 |      | 0.5 <0.05        |
| cor25 | SLC6414 | Central.memory.CD4.T.cell      | 0.370475731  | 0.003292678 | pos   | 0.370475731 |      | 0.5 <0.01        |
| cor26 | SLC6414 | Central.memory.CD8.T.cell      | 0.338609284  | 0.007601785 | pos   | 0.338609284 |      | 0.5 <0.01        |
| cor27 | SLC6414 | Effector.memory.CD8.T.cell     | 0.130785232  | 0.315062126 | pos   | 0.130785232 |      | 0.25 ns          |
| cor28 | SLC6414 | SLC6414                        |              | 1           | 0 pos |             | 1    | 1 Not Applicable |

**Table S5. Correlation analysis analysis between SLC6A14 and immune function pathways**

|       | gene    | path                   | r        | p        | sign  | absR     | rSeg | pSeg             |
|-------|---------|------------------------|----------|----------|-------|----------|------|------------------|
| cor   | SLC6414 | aDCs                   | 0.425583 | 0.000628 | pos   | 0.425583 |      | 0.5 <0.001       |
| cor1  | SLC6414 | APC_co_inhibition      | 0.533883 | 9.38E-06 | pos   | 0.533883 |      | 0.75 <0.001      |
| cor2  | SLC6414 | APC_co_stimulation     | 0.505544 | 3.24E-05 | pos   | 0.505544 |      | 0.75 <0.001      |
| cor3  | SLC6414 | B_cells                | 0.270106 | 0.035269 | pos   | 0.270106 |      | 0.5 <0.05        |
| cor4  | SLC6414 | CCR                    | 0.658181 | 8.20E-09 | pos   | 0.658181 |      | 0.75 <0.001      |
| cor5  | SLC6414 | CD8+_T_cells           | 0.128651 | 0.323093 | pos   | 0.128651 |      | 0.25 ns          |
| cor6  | SLC6414 | Check-point            | 0.486597 | 7.00E-05 | pos   | 0.486597 |      | 0.5 <0.001       |
| cor7  | SLC6414 | Cytolytic_activity     | 0.309477 | 0.015224 | pos   | 0.309477 |      | 0.5 <0.05        |
| cor8  | SLC6414 | DCs                    | 0.067897 | 0.603116 | pos   | 0.067897 |      | 0.25 ns          |
| cor9  | SLC6414 | HLA                    | 0.397088 | 0.001532 | pos   | 0.397088 |      | 0.5 <0.01        |
| cor10 | SLC6414 | iDCs                   | 0.030538 | 0.815275 | pos   | 0.030538 |      | 0.25 ns          |
| cor11 | SLC6414 | Inflammation-promoting | 0.548479 | 4.74E-06 | pos   | 0.548479 |      | 0.75 <0.001      |
| cor12 | SLC6414 | Macrophages            | 0.355915 | 0.004876 | pos   | 0.355915 |      | 0.5 <0.01        |
| cor13 | SLC6414 | Mast_cells             | 0.086139 | 0.509204 | pos   | 0.086139 |      | 0.25 ns          |
| cor14 | SLC6414 | Neutrophils            | 0.545807 | 5.38E-06 | pos   | 0.545807 |      | 0.75 <0.001      |
| cor15 | SLC6414 | NK_cells               | 0.099061 | 0.447518 | pos   | 0.099061 |      | 0.25 ns          |
| cor16 | SLC6414 | Parainflammation       | 0.671647 | 3.12E-09 | pos   | 0.671647 |      | 0.75 <0.001      |
| cor17 | SLC6414 | pDCs                   | 0.353801 | 0.005155 | pos   | 0.353801 |      | 0.5 <0.01        |
| cor18 | SLC6414 | T_cell_co-inhibition   | 0.485914 | 7.19E-05 | pos   | 0.485914 |      | 0.5 <0.001       |
| cor19 | SLC6414 | T_cell_co-stimulation  | 0.422166 | 0.000702 | pos   | 0.422166 |      | 0.5 <0.001       |
| cor20 | SLC6414 | T_helper_cells         | 0.128728 | 0.3228   | pos   | 0.128728 |      | 0.25 ns          |
| cor21 | SLC6414 | Tfh                    | 0.156381 | 0.228772 | pos   | 0.156381 |      | 0.25 ns          |
| cor22 | SLC6414 | Th1_cells              | 0.529075 | 1.17E-05 | pos   | 0.529075 |      | 0.75 <0.001      |
| cor23 | SLC6414 | Th2_cells              | 0.576631 | 1.15E-06 | pos   | 0.576631 |      | 0.75 <0.001      |
| cor24 | SLC6414 | TIL                    | 0.40667  | 0.001145 | pos   | 0.40667  |      | 0.5 <0.01        |
| cor25 | SLC6414 | Treg                   | 0.339486 | 0.007437 | pos   | 0.339486 |      | 0.5 <0.01        |
| cor26 | SLC6414 | Type_I_IFN_Reponse     | 0.354024 | 0.005125 | pos   | 0.354024 |      | 0.5 <0.01        |
| cor27 | SLC6414 | Type_II_IFN_Reponse    | 0.684111 | 1.22E-09 | pos   | 0.684111 |      | 0.75 <0.001      |
| cor28 | SLC6414 | SLC6414                |          | 1        | 0 pos |          | 1    | 1 Not Applicable |
